# Supplementary material for: A general nickel-catalyzed highly regioselective hydroarylation of unactivated alkenes enabled by the picolinamide auxiliary
Source: Royal Society of Chemistry journal article supplement (doi:10.1039/d2cc04932e), 2022-01-01

## **Supporting Information**

# **A General Nickel-Catalyzed Highly Regioselective Hydroarylation of Unactivated Alkenes Enabled by Picolinamide Auxiliary**

Lanlan Zhang,<sup>a</sup> Chun Luo,<sup>a</sup> Haoran Shi,<sup>a</sup> Lin Zhu,<sup>a</sup> Yuan-Qing Xu,<sup>b</sup> Zhong-Yan Cao,<sup>b,\*</sup> and Chao Wang<sup>a,\*</sup>

<sup>a</sup>Tianjin Key Laboratory of Structure and Performance for Functional Molecules, College of Chemistry, Tianjin Normal University, Tianjin 300387, China. E-mail: chwang@tjnu.edu.cn;

<sup>b</sup>College of Chemistry and Chemical Engineering, Henan University, Kaifeng 475004, China. E-mail: zycao@henu.edu.cn

## Table of Contents

|                                                                                         |    |
|-----------------------------------------------------------------------------------------|----|
| 1. General Remarks .....                                                                | 2  |
| 2. Condition Optimization.....                                                          | 3  |
| 3. Alkene Substrate Synthesis .....                                                     | 5  |
| 4. General Procedure for the Nickel(II)-Catalyzed Hydroarylation of Alkeny Amines ..... | 7  |
| 5. Synthetic Utilities .....                                                            | 20 |
| 6. Deuterium Labelling Experiments .....                                                | 23 |
| 7. References .....                                                                     | 23 |
| 8. NMR Spectra.....                                                                     | 24 |

## 1. General Remarks

All the manipulations were performed in an argon-filled glovebox, unless mentioned otherwise. Anhydrous solvent was purchased from commercial sources and transferred under argon atmosphere. Alkene substrates were prepared according to previously reported procedures, all arylboronic acids was purchased from commercial sources and used without further purification.

$^1\text{H}$  NMR,  $^{13}\text{C}$  NMR spectra were recorded using Bruker 400 MHz NMR spectrometer.

$^1\text{H}$  NMR and  $^{13}\text{C}$  NMR spectra were referenced to resonances of the residual protons in the deuterated solvents. Multiplicities are recorded as: s = singlet, d = doublet, t = triplet, dd = doublet of doublets, br = broad singlet and m = multiplet. GC-MS analysis was performed on Shimadzu GC-2010 gas chromatography coupled to a Shimadzu QP2010 mass selective detector. Analytical HPLC/MS was performed with an Agilent 6520 Series HPLC.

## 2. Condition Optimization

In order to identify the optimal conditions for the designed regioselective hydroarylation, amide **1a** bearing picolinamide auxiliary (PA) and phenyl boronic acid **2a** was chosen as the model substrates. After carefully evaluation of reaction parameters, it was noticed that the desired hydrophenylation product **3a** could be isolated with excellent yield (93%) in our hand, and the optimal conditions was shown in Table S1. During this process, the following five points should be highlighted. (1) No external ligand was necessary and the use of Ni(OTf)<sub>2</sub> is best for the transformation, although the employment of air-sensitive and expensive Ni(COD)<sub>2</sub> could also give rise to the same result (entries 2-3). As a comparison, the use of other nickel salts which include NiCl<sub>2</sub> or NiBr<sub>2</sub> only led to inferior yield (entry 1 vs. 4). (2) Control experiments confirmed that both solvent and base has great influence for the hydrophenylation, and the use of polar solvent DMF and K<sub>3</sub>PO<sub>4</sub> as base is optimal (entries 6-9). (3) a small amount of MeOH is good for the yield (entries 10-11). (4) Both the temperature and reaction time is also inevitable for obtaining the anticipated efficiency (entries 12-13). (5) The auxiliary plays a very decisive role for this process, as attempting to utilize other similar ones led to the complete shutdown of the transformation (entry 14). As demonstrated later, the PA auxiliary could be easily removed under basic conditions.

**Table S1** Optimal conditions.<sup>a</sup>

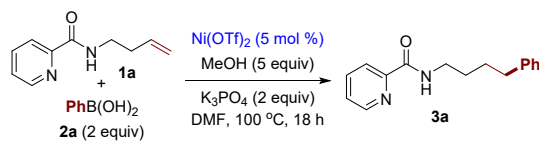

| Entry | Deviation from standard conditions                                     | Yield <b>3a</b> (%) <sup>b</sup> |
|-------|------------------------------------------------------------------------|----------------------------------|
| 1     | none                                                                   | 93                               |
| 2     | No $\text{Ni}(\text{OTf})_2$                                           | 0                                |
| 3     | $\text{Ni}(\text{COD})_2$ instead of $\text{Ni}(\text{OTf})_2$         | 93                               |
| 4     | $\text{NiCl}_2$ , $\text{NiBr}_2$ instead of $\text{Ni}(\text{OTf})_2$ | <55                              |
| 5     | 1,4-dioxane instead of DMF                                             | 42                               |
| 6     | MeCN instead of DMF                                                    | NR                               |
| 7     | <i>t</i> -BuOH instead of DMF                                          | 82                               |
| 8     | $\text{Cs}_2\text{CO}_3$ instead of $\text{K}_3\text{PO}_4$            | 84                               |
| 9     | $\text{KHCO}_3$ instead of $\text{K}_3\text{PO}_4$                     | 88                               |
| 10    | No MeOH                                                                | 78                               |
| 11    | MeOH instead of DMF                                                    | 86                               |
| 12    | 80 °C instead of 100 °C                                                | 59                               |
| 13    | 12 h instead of 18 h                                                   | 87                               |
| 14    |                                                                        |                                  |

<sup>a</sup> Conditions: **1a** (0.20 mmol), **2a** (2.0 equiv),  $\text{Ni}(\text{OTf})_2$  (0.01 mmol, 5 mol %),  $\text{K}_3\text{PO}_4$  (2.0 equiv), N,N-dimethylformamide (DMF) (1.0 mL), MeOH (6 mmol, 30 equiv) at 100 °C for 24 hours. <sup>b</sup> Isolated yield. NR = no reaction.

### 3. Alkene Substrate Synthesis

**Table S2.** Picolinamide-containing alkene substrates **S-1b** – **S-Z-1r**.

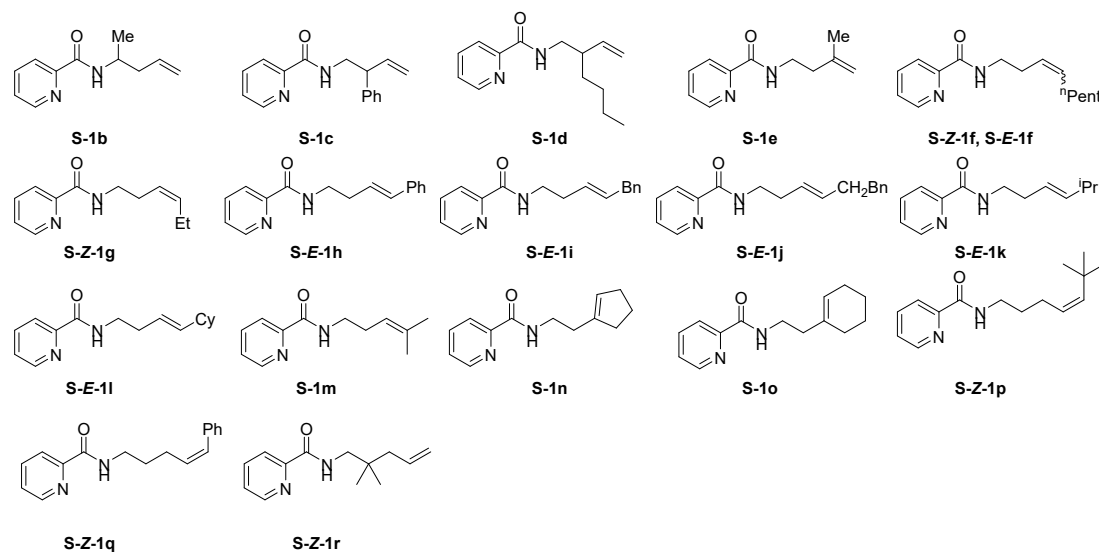

The synthesis of compounds **S-E-1j** and **S-E-1l**.

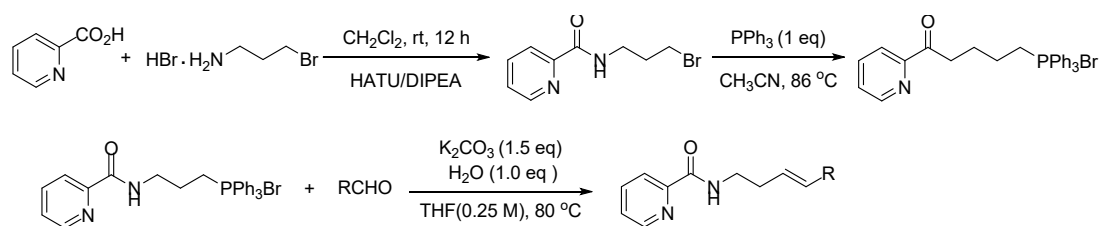

To a 50 mL flask was added 3-bromopropylamine hydrobromide (1.0 eq), picolinic acid (1.2 eq), HATU (1.1 eq), DIPEA (2 eq) and  $\text{CH}_2\text{Cl}_2$  (30 mL). The reaction mixture was left to stir for 12 h. After that, the reaction mixture was diluted with EtOAc (100 mL) and washed with brine ( $3 \times 100$  mL). The organic layer was separated, dried over  $\text{Na}_2\text{SO}_4$ , and concentrated, and carried forward to the next step without further purification. <sup>[1]</sup>

$\text{PPh}_3$  (30 mmol, 1.0 eq),  $\text{CH}_3\text{CN}$  (150 mL) was added to the resulting solution and then the reaction vessel was allowed to heat to reflux under argon for 48 h. After this time, the reaction vessel was cooled to room temperature, removed solvent by vacuum. Then added aldehyde (30 mmol, 1.0 eq),  $\text{K}_2\text{CO}_3$  (45 mmol, 1.5 eq),  $\text{H}_2\text{O}$  (30 mmol, 1.0 eq) in THF (80 mL) was stirred at 80 °C for 12 h. After that, the combined organic layers were washed with water and brine, dried over anhydrous  $\text{Na}_2\text{SO}_4$ , filtered and

concentrated in vacuo. The resulting residue was purified by silica gel flash chromatography (ethyl acetate:hexanes = 1:8) to give the desired product.

**(E)-N-(6-phenylhex-3-en-1-yl)picolinamide (S-E-1j)**

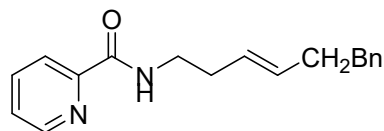

The title compound was isolated as yellow oil after chromatography on silica with ethyl acetate/hexane (1:8). <sup>1</sup>H NMR (400 MHz, CDCl<sub>3</sub>) δ 8.53 (dd, J = 4.8, 0.6 Hz, 1H), 8.20 (d, J = 7.8 Hz, 1H), 8.09 (br, 1H), 7.94 – 7.78 (m, 1H), 7.41 (m, 1H), 7.36 – 7.21 (m, 2H), 7.21 – 7.08 (m, 3H), 5.65 – 5.53 (m, 1H), 5.44 (m, 1H), 3.44 (dd, J = 13.1, 6.8 Hz, 2H), 2.66 (dd, J = 15.6, 8.3 Hz, 2H), 2.43 – 2.20 (m, 4H). <sup>13</sup>C NMR (101 MHz, CDCl<sub>3</sub>) δ 164.3, 150.1, 148.1, 141.9, 137.4, 131.8, 128.5, 128.3, 126.6, 126.2, 125.9, 122.3, 39.1, 35.9, 29.3, 27.6. GC-MS (EI): Calcd for C<sub>18</sub>H<sub>20</sub>N<sub>2</sub>O:280.16, found: 280.19.

**(E)-N-(4-phenylbut-3-en-1-yl)picolinamide (S-E-1l)**

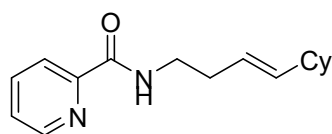

The title compound was isolated as a yellow oil after chromatography on silica with ethyl acetate/hexane (1:8). <sup>1</sup>H NMR (400 MHz, CDCl<sub>3</sub>) δ 8.54 – 8.51 (m, 1H), 8.20 (m, 1H), 8.12 (br, 1H), 7.84 (m, 1H), 7.41 (m, 1H), 5.47 – 5.22 (m, 2H), 3.50 (dd, J = 13.0, 6.8 Hz, 2H), 2.39 (m, 2H), 2.30 – 2.15 (m, 1H), 1.69 – 1.53 (m, 6H), 1.28 – 1.12 (m, 4H), 1.04 (m, 2H). <sup>13</sup>C NMR (101 MHz, CDCl<sub>3</sub>) δ 164.3, 150.1, 148.0, 139.1, 137.4, 126.1, 123.8, 122.2, 39.3, 36.5, 33.3, 27.8, 26.0, 25.9. GC-MS (EI): Calcd for C<sub>18</sub>H<sub>20</sub>N<sub>2</sub>O:258.17, found:258.19.

**Table S3.** Reference containing synthetic/characterization data for known substrates.

| Alkene substrates       | Reference                                            |
|-------------------------|------------------------------------------------------|
| <b>S-1b - S-1g</b>      | <i>Cell Rep. Phys. Sci.</i> <b>2021</b> , 2, 100574. |
| <b>S-1h, S-1i, S-1k</b> | <i>Nat. Commun.</i> <b>2021</b> , 12, 6280.          |
| <b>S-1n</b>             | <i>Org. Lett.</i> <b>2016</b> , 18, 5014.            |
| <b>S-1o, S-Z-1p</b>     | <i>J. Am. Chem. Soc.</i> <b>2019</b> , 141, 8758.    |
| <b>S-Z-1q, S-Z-1r</b>   | <i>Nat. Commun.</i> <b>2021</b> , 12, 6280.          |

## 4. General Procedure for the Nickel(II)-Catalyzed Hydroarylation of Alkeny Amines

In an argon-filled glovebox, Ni(OTf)<sub>2</sub> (0.01 mmol, 5 mol%), K<sub>3</sub>PO<sub>4</sub> (0.4 mmol, 2.0 eq), alkene substrate (0.2 mmol, 1.0 eq), appropriate aryl boronic nucleophile (0.4 mmol, 2 eq), DMF (1 mL) and MeOH (243.0 μL, 30 eq) were added to a 10 mL schlenk flask. The reaction mixture was stirred at 100 °C for 18 h and the resulting solution was concentrated in vacuum. The crude product was purified by column chromatography on silica gel with a mixture of ethyl acetate and hexane as eluent. The conditions for flash chromatography and data for characterization of the products are listed below.

### N-(4-phenylbutyl)picolinamide (3a)

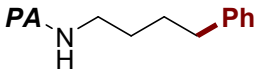 The title compound was isolated as yellow oil (93% yield) after chromatography on silica with ethyl acetate/hexane (1:6). <sup>1</sup>H NMR (400 MHz, CDCl<sub>3</sub>) δ 8.50 (d, J = 4.5 Hz, 1H), 8.16 (d, J = 7.8 Hz, 1H), 8.03 (br, 1H), 7.80 (m, 1H), 7.37 (dd, J = 6.9, 5.2 Hz, 1H), 7.33 – 7.17 (m, 2H), 7.15 (d, J = 7.0 Hz, 3H), 3.49 – 3.44 (m, 2H), 2.64 (t, J = 7.2 Hz, 2H), 1.79 – 1.53 (m, 4H); <sup>13</sup>C NMR (101 MHz, CDCl<sub>3</sub>) δ 164.3, 150.1, 148.1, 142.2, 137.4, 128.5, 128.4, 126.1, 125.8, 122.2, 39.3, 35.6, 29.3, 28.8. GC-MS (EI): Calcd for C<sub>16</sub>H<sub>18</sub>N<sub>2</sub>O: 254.14, found: 254.20.

### N-(4-(*o*-tolyl)butyl)picolinamide (3b)

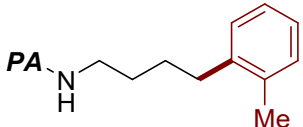 The title compound was isolated as yellow oil (93% yield) after chromatography on silica with ethyl acetate/hexane (1:6). <sup>1</sup>H NMR (400 MHz, CDCl<sub>3</sub>) δ 8.54 (d, J = 4.2 Hz, 1H), 8.21 (d, J = 7.8 Hz, 1H), 8.12 (br, 1H), 7.87 – 7.82 (m, 1H), 7.44 – 7.40 (m, 1H), 7.25 – 7.03 (m, 4H), 3.55 – 3.50 (m, 2H), 2.66 (t, J = 7.4 Hz, 2H), 2.30 (s, 3H), 1.87 – 1.58 (m, 4H); <sup>13</sup>C NMR (101 MHz, CDCl<sub>3</sub>) δ 164.2, 149.9, 148.0, 140.3, 137.5, 135.9, 130.2, 128.9, 126.1, 126.0, 125.9, 122.3, 39.4, 32.9, 29.6, 27.6, 19.3. GC-MS (EI): Calcd for C<sub>17</sub>H<sub>20</sub>N<sub>2</sub>O: 268.16, found: 268.23.

### N-(4-(*m*-tolyl)butyl)picolinamide (3c)

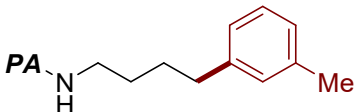 The title compound was isolated as yellow oil (86% yield) after chromatography on silica with ethyl acetate/hexane (1:6). <sup>1</sup>H



NMR (400 MHz, CDCl<sub>3</sub>)  $\delta$  8.54 (d, *J* = 4.1 Hz, 1H), 8.21 (d, *J* = 7.8 Hz, 1H), 8.10 (br, 1H), 7.86 (t, *J* = 7.7 Hz, 1H), 7.43 (dd, *J* = 7.4, 4.9 Hz, 1H), 7.16 (t, *J* = 7.8 Hz, 1H), 7.02 – 6.93 (m, 2H), 3.78 – 3.52 (m, 2H), 2.63 (t, *J* = 7.2 Hz, 2H), 2.32 (s, 3H), 1.98 – 1.59 (m, 4H); <sup>13</sup>C NMR (101 MHz, CDCl<sub>3</sub>)  $\delta$  163.9, 149.8, 147.6, 142.2, 137.9, 129.3, 129.3, 128.3, 126.6, 126.3, 125.5, 122.6, 39.5, 35.5, 29.3, 28.9, 21.5. GC-MS (EI): Calcd for C<sub>17</sub>H<sub>20</sub>N<sub>2</sub>O: 268.16, found: 268.23.

#### N-(4-(*p*-tolyl)butyl)picolinamide (3d)

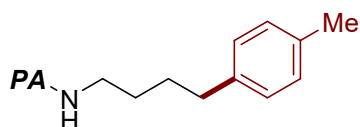

The title compound was isolated as yellow oil (89% yield) after chromatography on silica with ethyl acetate/hexane (1:6). <sup>1</sup>H NMR (400 MHz, CDCl<sub>3</sub>)  $\delta$  8.53 (d, *J* = 4.7 Hz, 1H), 8.20 (d, *J* = 7.8 Hz, 1H), 8.09 (br, 1H), 7.84 (m, 1H), 7.41 (dd, *J* = 7.5, 4.8 Hz, 1H), 7.08 (s, 4H), 3.52 – 3.47 (m, 2H), 2.63 (t, *J* = 7.1 Hz, 2H), 2.31 (s, 3H), 1.89 – 1.55 (m, 4H); <sup>13</sup>C NMR (101 MHz, CDCl<sub>3</sub>)  $\delta$  164.4, 150.0, 148.0, 139.1, 137.4, 135.3, 134.1, 129.1, 128.3, 126.1, 122.3, 39.4, 35.1, 29.3, 28.9, 21.0. GC-MS (EI): Calcd for C<sub>17</sub>H<sub>20</sub>N<sub>2</sub>O: 268.16, found: 268.23.

#### N-(4-(4-fluorophenyl)butyl)picolinamide (3e)

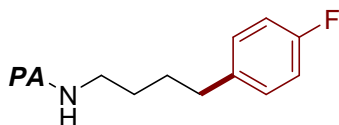

The title compound was isolated as yellow oil (89% yield) after chromatography on silica with ethyl acetate/hexane (1:6). <sup>1</sup>H NMR (400 MHz, CDCl<sub>3</sub>)  $\delta$  8.54 (dd, *J* = 4.7, 0.7 Hz, 1H), 8.20 (d, *J* = 7.8 Hz, 1H), 8.09 (br, 1H), 7.85 (m, 1H), 7.43 (m, 1H), 7.18 – 7.05 (m, 2H), 7.03 – 6.85 (m, 2H), 3.49 (m, 2H), 2.64 (t, *J* = 7.1 Hz, 2H), 1.86 – 1.43 (m, 4H); <sup>13</sup>C NMR (101 MHz, CDCl<sub>3</sub>)  $\delta$  164.3, 162.5, 160.1, 150.0, 148.0, 137.8, 137.6, 129.8, 129.8, 126.2, 122.4, 115.2, 115.0, 39.3, 34.8, 29.3, 28.9. GC-MS (EI): Calcd for C<sub>16</sub>H<sub>17</sub>FN<sub>2</sub>O: 272.13, found: 272.15.

#### N-(4-(4-chlorophenyl)butyl)picolinamide (3f)

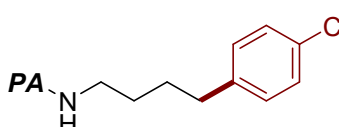

The title compound was isolated as yellow oil (87% yield) after chromatography on silica with ethyl acetate/hexane (1:6). <sup>1</sup>H NMR (400 MHz, CDCl<sub>3</sub>)  $\delta$  8.54 (d, *J* = 4.3 Hz, 1H), 8.21 (d, *J* = 7.8 Hz, 1H), 8.09 (br, 1H), 7.88 – 7.84 (m, 1H), 7.45 – 7.41 (m, 1H), 7.24 – 7.22 (m, 2H), 7.10 (d, *J* = 8.3 Hz, 2H), 3.49 (m, 2H), 2.64 (t, *J* = 7.2 Hz, 2H), 1.93 – 1.48 (m, 4H); <sup>13</sup>C

NMR (101 MHz, CDCl<sub>3</sub>)  $\delta$  164.1, 149.8, 147.8, 140.6, 137.8, 131.6, 129.8, 128.5, 126.3, 122.5, 39.3, 34.9, 29.2, 28.7. GC-MS (EI): Calcd for C<sub>16</sub>H<sub>17</sub>ClN<sub>2</sub>O: 288.10, found: 288.13.

### N-(4-(4-bromophenyl)butyl)picolinamide (3g)

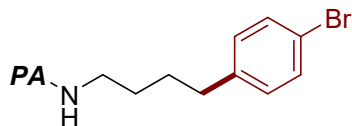

The title compound was isolated as green oil (78% yield) after chromatography on silica with ethyl acetate/hexane (1:6). <sup>1</sup>H NMR (400 MHz, CDCl<sub>3</sub>)  $\delta$  8.53 (d, *J* = 4.6 Hz, 1H), 8.19 (d, *J* = 7.8 Hz, 1H), 8.05 (s, 1H), 7.86 – 7.81 (m, 1H), 7.45 – 7.34 (m, 3H), 7.05 (d, *J* = 8.3 Hz, 2H), 3.48 (m, 2H), 2.61 (t, *J* = 7.1 Hz, 2H), 1.75 – 1.53 (m, 4H); <sup>13</sup>C NMR (101 MHz, CDCl<sub>3</sub>)  $\delta$  164.2, 149.9, 148.0, 141.0, 137.3, 131.3, 130.2, 126.1, 122.2, 119.5, 39.1, 34.9, 29.1, 28.5. GC-MS (EI): Calcd for C<sub>16</sub>H<sub>17</sub>BrN<sub>2</sub>O: 332.05, found: 332.11.

### N-(4-(4-methoxyphenyl)butyl)picolinamide (3h)

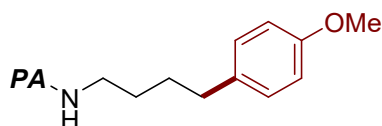

The title compound was isolated as green oil (84% yield) after chromatography on silica with ethyl acetate/hexane (1:6). <sup>1</sup>H NMR (400 MHz, CDCl<sub>3</sub>)  $\delta$  8.53 (d, *J* = 4.5 Hz, 1H), 8.20 (d, *J* = 7.8 Hz, 1H), 8.06 (br, 1H), 7.83 (dd, *J* = 11.1, 4.3 Hz, 1H), 7.41 (dd, *J* = 7.2, 4.9 Hz, 1H), 7.09 (d, *J* = 8.4 Hz, 2H), 6.82 (d, *J* = 8.5 Hz, 2H), 3.78 (s, 3H), 3.51 – 3.46 (m, 2H), 2.61 (t, *J* = 7.0 Hz, 2H), 1.71–1.64 (m, 4H); <sup>13</sup>C NMR (101 MHz, CDCl<sub>3</sub>)  $\delta$  164.3, 157.8, 150.1, 148.0, 137.5, 134.3, 129.4, 126.1, 122.3, 113.8, 55.3, 39.4, 34.7, 29.3, 29.0. GC-MS (EI): Calcd for C<sub>17</sub>H<sub>20</sub>N<sub>2</sub>O<sub>2</sub>: 284.15, found: 284.16.

### N-(4-(4-(trifluoromethoxy)phenyl)butyl)picolinamide (3i)

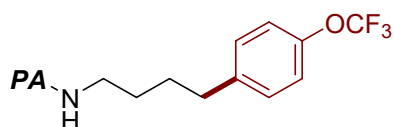

The title compound was isolated as yellow oil (86% yield) after chromatography on silica with ethyl acetate/hexane (1:6). <sup>1</sup>H NMR (400 MHz, CDCl<sub>3</sub>)  $\delta$  8.54 (d, *J* = 4.6 Hz, 1H), 8.20 (d, *J* = 7.8 Hz, 1H), 8.11 (br, 1H), 7.88 – 7.84 (m, 1H), 7.45 – 7.41 (m, 1H), 7.19 (d, *J* = 8.6 Hz, 2H), 7.11 (d, *J* = 8.2 Hz, 2H), 3.62 – 3.39 (m, 2H), 2.67 (t, *J* = 7.2 Hz, 2H), 1.81 – 1.56 (m, 4H); <sup>13</sup>C NMR (101 MHz, CDCl<sub>3</sub>)  $\delta$  164.2, 149.9, 147.9, 147.5, 140.9, 137.7, 129.7, 126.3, 124.4, 122.5, 121.9, 121.0, 119.3, 116.8, 39.3, 34.9, 29.3, 28.7. GC-MS (EI): Calcd for C<sub>17</sub>H<sub>17</sub>F<sub>3</sub>N<sub>2</sub>O<sub>2</sub>: 338.12, found: 338.15.

### N-(4-(4-(trifluoromethyl)phenyl)butyl)picolinamide (3j)

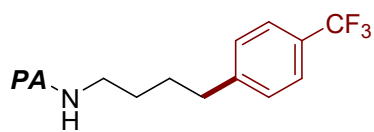

The title compound was isolated as yellow oil (84% yield) after chromatography on silica with ethyl acetate/hexane (1:6). <sup>1</sup>H NMR (400 MHz, CDCl<sub>3</sub>) δ 8.51 (d, J = 4.3 Hz, 1H), 8.16 (d, J = 7.8 Hz, 1H), 8.10 (br, 1H), 7.82 (m, 1H), 7.49 (d, J = 8.0 Hz, 2H), 7.40 (m, 1H), 7.30 – 7.18 (m, 2H), 3.49 (m, 2H), 2.69 (t, J = 7.2 Hz, 2H), 1.82 – 1.52 (m, 4H); <sup>13</sup>C NMR (101 MHz, CDCl<sub>3</sub>) δ 164.5, 149.8, 148.1, 146.3, 137.6, 134.4, 128.8, 126.3, 125.4, 125.3, 122.4, 39.3, 35.4, 29.3, 28.5. GC-MS (EI): Calcd for C<sub>17</sub>H<sub>17</sub>F<sub>3</sub>N<sub>2</sub>O<sub>2</sub>: 322.13, found: 322.16.

### N-(4-(4-(dimethylamino)phenyl)butyl)picolinamide (3k)

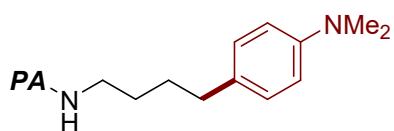

The title compound was isolated as a yellow oil (83% yield) after chromatography on silica with ethyl acetate/hexane (1:6). <sup>1</sup>H NMR (400 MHz, CDCl<sub>3</sub>) δ 8.53 (d, J = 4.7 Hz, 1H), 8.20 (d, J = 7.8 Hz, 1H), 8.05 (br, 1H), 7.83 (m, 1H), 7.47 – 7.34 (m, 1H), 7.06 (d, J = 8.5 Hz, 2H), 6.69 (d, J = 8.6 Hz, 2H), 3.51 – 3.47 (m, 2H), 2.91 (s, 6H), 2.58 (t, J = 7.0 Hz, 2H), 1.78 – 1.62 (m, 4H); <sup>13</sup>C NMR (101 MHz, CDCl<sub>3</sub>) δ 164.3, 150.1, 149.1, 148.1, 137.4, 130.4, 129.1, 126.1, 122.2, 113.1, 41.0, 39.4, 34.5, 29.3, 29.1. GC-MS (EI): Calcd for C<sub>18</sub>H<sub>23</sub>N<sub>3</sub>O: 297.18, found: 297.20.

### N-(4-(3-bromophenyl)butyl)picolinamide (3l)

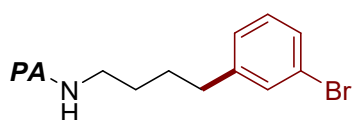

The title compound was isolated as yellow oil (83% yield) after chromatography on silica with ethyl acetate/hexane (1:6). <sup>1</sup>H NMR (400 MHz, CDCl<sub>3</sub>) δ 8.47 (m, 1H), 8.13 (dd, J = 7.8, 0.9 Hz, 1H), 8.01 (br, 1H), 7.79 – 7.75 (m, 1H), 7.36 – 7.33 (m, 1H), 7.28 – 7.20 (m, 2H), 7.14 – 6.98 (m, 2H), 3.43 (m, 2H), 2.56 (t, J = 7.2 Hz, 2H), 1.72 – 1.46 (m, 4H); <sup>13</sup>C NMR (101 MHz, CDCl<sub>3</sub>) δ 164.3, 150.0, 148.0, 144.6, 137.5, 131.5, 130.0, 129.0, 127.2, 126.2, 122.5, 122.3, 39.2, 35.2, 29.3, 28.6. GC-MS (EI): Calcd for C<sub>16</sub>H<sub>17</sub>BrN<sub>2</sub>O: 332.05, found: 332.11.

### N-(4-(3-(dimethylamino)phenyl)butyl)picolinamide (3m)

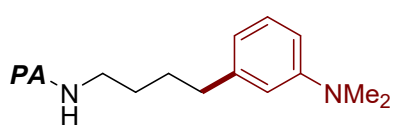

The title compound was isolated as yellow oil (91% yield) after chromatography on silica with ethyl acetate/hexane (1:6). <sup>1</sup>H NMR (400 MHz, CDCl<sub>3</sub>) δ 8.45 (d, J = 4.2 Hz, 1H),

8.12 (d,  $J = 7.8$  Hz, 1H), 7.99 (br, 1H), 7.78 – 7.73 (m, 1H), 7.34 – 7.31 (m, 1H), 7.11 – 7.02 (m, 1H), 6.52 (dd,  $J = 10.7, 4.3$  Hz, 3H), 3.45 – 3.40 (m, 2H), 2.86 (s, 6H), 2.55 (t,  $J = 7.3$  Hz, 2H), 1.73 – 1.50 (m, 4H);  $^{13}\text{C}$  NMR (101 MHz,  $\text{CDCl}_3$ )  $\delta$  164.3, 150.6, 150.1, 148.0, 143.2, 137.4, 129.1, 126.1, 122.2, 117.3, 113.1, 110.6, 40.9, 40.9, 39.4, 36.1, 29.4, 28.9. GC-MS (EI): Calcd for  $\text{C}_{18}\text{H}_{23}\text{N}_3\text{O}$ : 297.18, found: 297.20.

#### N-(4-(naphthalen-2-yl)butyl)picolinamide (3n)

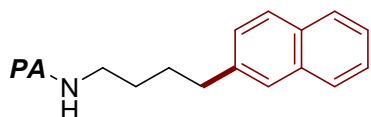

The title compound was isolated as brown oil (88% yield) after chromatography on silica with ethyl acetate/hexane (1:6).  $^1\text{H}$  NMR (400 MHz,  $\text{CDCl}_3$ )  $\delta$  8.53 (dd,  $J = 4.7, 0.6$  Hz, 1H), 8.20 (d,  $J = 7.8$  Hz, 1H), 8.06 (br, 1H), 7.86–7.75 (m, 4H), 7.62 (s, 1H), 7.47–7.39 (m, 3H),  $\delta$  7.33 (dd,  $J = 8.4, 1.6$  Hz, 1H), 3.52 (dd,  $J = 13.3, 6.9$  Hz, 2H), 2.84 (t,  $J = 7.5$  Hz, 2H), 1.88–1.68 (m, 4H);  $^{13}\text{C}$  NMR (101 MHz,  $\text{CDCl}_3$ )  $\delta$  164.4, 150.1, 148.1, 139.7, 137.4, 133.7, 132.1, 128.0, 127.7, 127.5, 127.4, 126.5, 126.1, 126.0, 125.2, 122.3, 39.4, 35.7, 29.4, 28.7. GC-MS (EI): Calcd for  $\text{C}_{20}\text{H}_{20}\text{N}_2\text{O}$ : 304.16, found: 304.18.

#### N-(4-(benzo[d][1,3]dioxol-5-yl)butyl)picolinamide (3o)

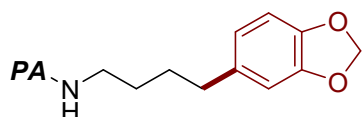

The title compound was isolated as brown oil (88% yield) after chromatography on silica with ethyl acetate/hexane (1:6).  $^1\text{H}$  NMR (400 MHz,  $\text{CDCl}_3$ )  $\delta$  8.54 (d,  $J = 3.9$  Hz, 1H), 8.20 (d,  $J = 7.7$  Hz, 1H), 8.07 (br, 1H), 7.85 (t,  $J = 7.5$  Hz, 1H), 7.42 (dd,  $J = 7.1, 4.8$  Hz, 1H), 6.94 – 6.52 (m, 3H), 5.91 (s, 2H), 3.57 – 3.40 (m, 2H), 2.59 (t,  $J = 6.9$  Hz, 2H), 1.72 – 1.58 (m, 4H);  $^{13}\text{C}$  NMR (101 MHz,  $\text{CDCl}_3$ )  $\delta$  164.1, 149.9, 147.9, 147.6, 145.6, 137.7, 136.1, 126.2, 122.5, 121.2, 108.9, 108.2, 100.8, 39.4, 35.3, 29.2, 29.1. GC-MS (EI): Calcd for  $\text{C}_{17}\text{H}_{18}\text{N}_2\text{O}_3$ : 298.13, found: 298.17.

#### N-(4-(4-acetylphenyl)butyl)picolinamide (3p)

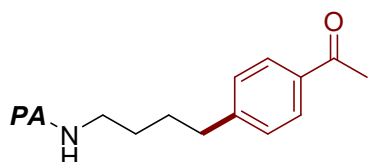

The title compound was isolated as green oil (88% yield) after chromatography on silica with ethyl acetate/hexane (1:6).  $^1\text{H}$  NMR (400 MHz,  $\text{CDCl}_3$ )  $\delta$  8.52 (d,  $J = 4.2$  Hz, 1H), 8.18 (d,  $J = 7.8$  Hz, 1H), 8.08 (br, 1H), 7.88–7.82 (m, 3H), 7.42 – 7.39 (m, 1H), 7.27–7.24 (m, 2H), 3.51 – 3.46 (m, 2H), 2.71 (t,  $J = 7.4$  Hz, 2H), 2.56 (s, 3H), 1.77 – 1.63 (m, 4H);  $^{13}\text{C}$  NMR

(101 MHz, CDCl<sub>3</sub>)  $\delta$  197.9, 164.3, 149.9, 148.0, 148.0, 137.5, 135.1, 128.6, 126.2, 122.3, 39.2, 35.60, 29.3, 28.4, 26.6. GC-MS (EI): Calcd for C<sub>18</sub>H<sub>20</sub>N<sub>2</sub>O<sub>2</sub>: 296.15, found: 296.18.

#### Methyl 4-(4-(picolinamido)butyl)benzoate (3q)

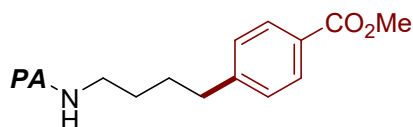

The title compound was isolated as yellow oil (88% yield) after chromatography on silica with ethyl acetate/hexane (1:6). <sup>1</sup>H NMR (400 MHz, CDCl<sub>3</sub>)  $\delta$  8.53 (d, J = 4.7 Hz,

1H), 8.19 (d, J = 7.8 Hz, 1H), 8.08 (br, 1H), 7.94 (d, J = 8.2 Hz, 2H), 7.86 – 7.82 (m, 1H), 7.47 – 7.36 (m, 1H), 7.24 (d, J = 8.2 Hz, 2H), 3.89 (s, 3H), 3.52 – 3.47 (m, 2H), 2.72 (t, J = 7.4 Hz, 2H), 1.85 – 1.60 (m, 4H); <sup>13</sup>C NMR (101 MHz, CDCl<sub>3</sub>)  $\delta$  167.2, 164.3, 149.9, 148.0, 147.8, 137.6, 129.8, 128.5, 127.9, 126.2, 122.4, 52.1, 39.2, 35.6, 29.3, 28.5. GC-MS (EI): Calcd for C<sub>18</sub>H<sub>20</sub>N<sub>2</sub>O<sub>3</sub>: 312.15, found: 312.12.

#### N-(4-(4-cyanophenyl)butyl)picolinamide (3r)

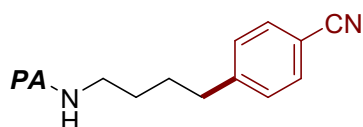

The title compound was isolated as green oil (75% yield) after chromatography on silica with ethyl acetate/hexane (1:6). <sup>1</sup>H NMR (400 MHz, CDCl<sub>3</sub>)  $\delta$  8.54 (d, J = 4.7 Hz, 1H), 8.20 (d, J

= 7.8 Hz, 1H), 8.08 (br, 1H), 7.87 – 7.83 (m, 1H), 7.56 (d, J = 8.1 Hz, 2H), 7.45–7.41 (m, 1H), 7.28 (d, J = 8.1 Hz, 2H), 3.53 – 3.48 (m, 2H), 2.73 (t, J = 7.3 Hz, 2H), 1.76 – 1.67 (m, 4H); <sup>13</sup>C NMR (101 MHz, CDCl<sub>3</sub>)  $\delta$  164.4, 150.0, 148.1, 147.9, 137.5, 132.3, 129.3, 126.2, 122.3, 119.2, 109.8, 39.1, 35.7, 29.3, 28.3. GC-MS (EI): Calcd for C<sub>17</sub>H<sub>17</sub>N<sub>3</sub>O: 279.14, found: 279.24.

#### N-(4-(3-formylphenyl)butyl)picolinamide (3s)

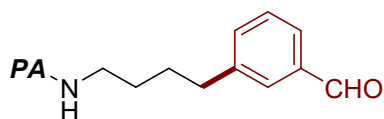

The title compound was isolated as yellow oil (84% yield) after chromatography on silica with ethyl acetate/hexane (1:6). <sup>1</sup>H NMR (400 MHz, CDCl<sub>3</sub>)  $\delta$  9.97 (s, 1H), 8.52 (d, J =

4.2 Hz, 1H), 8.18 (d, J = 7.8 Hz, 1H), 8.07 (br, 1H), 7.82 (dd, J = 11.0, 4.4 Hz, 1H), 7.68 (dd, J = 5.0, 2.0 Hz, 2H), 7.49 – 7.34 (m, 3H), 3.52 – 3.47 (m, 2H), 2.74 (t, J = 7.4 Hz, 2H), 1.88 – 1.59 (m, 4H); <sup>13</sup>C NMR (101 MHz, CDCl<sub>3</sub>)  $\delta$  192.6, 164.4, 150.0, 148.1, 143.3, 137.4, 136.6, 134.8, 129.4, 129.1, 127.7, 126.2, 122.3, 39.2, 35.2, 29.3, 28.6. GC-MS (EI): Calcd for C<sub>17</sub>H<sub>18</sub>N<sub>2</sub>O<sub>2</sub>: 282.14, found: 282.12.

### N-(4-(thiophen-3-yl)butyl)picolinamide (3t)

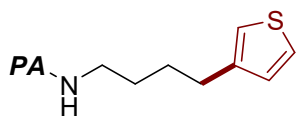

The title compound was isolated as green oil (84% yield) after chromatography on silica with ethyl acetate/hexane (1:6).  $^1\text{H}$  NMR (400 MHz,  $\text{CDCl}_3$ )  $\delta$  8.54 (d,  $J$  = 4.1 Hz, 1H), 8.20 (d,  $J$  = 7.8 Hz, 1H), 8.08 (br, 1H), 7.86 – 7.82 (m, 1H), 7.43 – 7.40 (m, 1H), 7.28 – 7.16 (m, 1H), 6.94 (d,  $J$  = 4.3 Hz, 2H), 3.52 – 3.46 (m, 2H), 2.69 (t,  $J$  = 7.2 Hz, 2H), 1.89 – 1.59 (m, 4H);  $^{13}\text{C}$  NMR (101 MHz,  $\text{CDCl}_3$ )  $\delta$  164.3, 150.0, 148.0, 142.5, 137.5, 128.3, 126.2, 125.4, 122.3, 120.2, 39.3, 29.9, 29.3, 28.0. GC-MS (EI): Calcd for  $\text{C}_{15}\text{H}_{18}\text{N}_2\text{S}$ : 260.09, found: 260.12.

### N-(4-(furan-3-yl)butyl)picolinamide (3u)

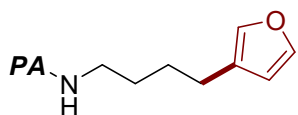

The title compound was isolated as yellow oil (69% yield) after chromatography on silica with ethyl acetate/hexane (1:6).  $^1\text{H}$  NMR (400 MHz,  $\text{CDCl}_3$ )  $\delta$  8.54 (d,  $J$  = 4.1 Hz, 1H), 8.21 (d,  $J$  = 7.8 Hz, 1H), 8.11 (br, 1H), 7.88 – 7.84 (m, 1H), 7.45 – 7.43 (m, 1H), 7.34 (d,  $J$  = 1.6 Hz, 1H), 7.22 (s, 1H), 6.27 (s, 1H), 3.52 – 3.47 (m, 2H), 2.48 (t,  $J$  = 6.7 Hz, 2H), 1.74 – 1.55 (m, 4H);  $^{13}\text{C}$  NMR (101 MHz,  $\text{CDCl}_3$ )  $\delta$  164.2, 149.9, 147.9, 142.8, 139.0, 137.7, 126.2, 124.8, 122.5, 111.0, 39.3, 29.3, 27.4, 24.5. GC-MS (EI): Calcd for  $\text{C}_{14}\text{H}_{16}\text{N}_2\text{O}_2$ : 244.12, found: 244.23.

### N-(4-(1H-indol-3-yl)butyl)picolinamide (3v)

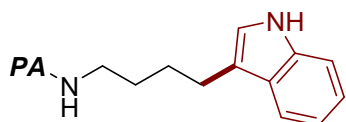

The title compound was isolated as brown oil (58% yield) after chromatography on silica with ethyl acetate/hexane (1:6).  $^1\text{H}$  NMR (400 MHz,  $\text{CDCl}_3$ )  $\delta$  8.54 – 8.52 (m, 1H), 8.23 (d,  $J$  = 7.8 Hz, 1H), 8.16 (d,  $J$  = 15.8 Hz, 2H), 7.90 – 7.86 (m, 1H), 7.46 – 7.42 (m, 2H), 7.31 (d,  $J$  = 8.3 Hz, 1H), 7.21 – 7.13 (m, 1H), 7.03 (dd,  $J$  = 8.3, 1.5 Hz, 1H), 6.49 – 6.47 (m, 1H), 3.51 (dd,  $J$  = 13.1, 6.8 Hz, 2H), 2.76 (t,  $J$  = 7.3 Hz, 2H), 1.79 (m, 2H), 1.74 – 1.64 (m, 2H);  $^{13}\text{C}$  NMR (101 MHz,  $\text{CDCl}_3$ )  $\delta$  164.2, 150.0, 148.0, 137.3, 134.5, 133.4, 128.0, 126.0, 124.3, 122.9, 122.1, 119.8, 110.8, 102.2, 39.4, 35.6, 29.4, 29.2. GC-MS (EI): Calcd for  $\text{C}_{18}\text{H}_{19}\text{N}_3\text{O}$ : 293.15, found: 293.13.

### N-(5-phenylpentan-2-yl)picolinamide (3w)

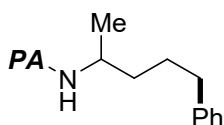

The title compound was isolated as brown oil (57% yield) after chromatography on silica with ethyl acetate/hexane (1:6).  $^1\text{H}$  NMR (400 MHz,  $\text{CDCl}_3$ )  $\delta$  8.51 (dd,  $J = 2.9, 1.9$  Hz, 1H), 8.18 (d,  $J = 7.8$  Hz, 1H), 7.95 – 7.71 (m, 2H), 7.44 – 7.37 (m, 1H), 7.27 – 7.06 (m, 5H), 4.25 – 4.19 (m, 1H), 2.63 (t,  $J = 7.5$  Hz, 2H), 1.83 – 1.66 (m, 2H), 1.64 – 1.52 (m, 2H), 1.34 – 1.10 (m, 3H);  $^{13}\text{C}$  NMR (101 MHz,  $\text{CDCl}_3$ )  $\delta$  163.6, 150.2, 148.0, 142.3, 137.4, 128.5, 128.3, 126.1, 125.8, 122.3, 45.2, 36.6, 35.8, 28.0, 21.1. GC-MS (EI): Calcd for  $\text{C}_{17}\text{H}_{20}\text{N}_2\text{O}$ : 268.16, found: 268.19.

#### N-(2,4-diphenylbutyl)picolinamide (3x)

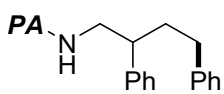

The title compound was isolated as brown oil (76% yield) after chromatography on silica with ethyl acetate/hexane (1:6).  $^1\text{H}$  NMR (400 MHz,  $\text{CDCl}_3$ )  $\delta$  8.37 (dd,  $J = 4.4, 1.2$  Hz, 1H), 8.08 (d,  $J = 7.8$  Hz, 1H), 7.91 (br, 1H), 7.75 – 7.70 (m, 1H), 7.34 – 7.24 (m, 3H), 7.21 – 7.13 (m, 5H), 7.12 – 6.97 (m, 3H), 3.87 – 3.71 (m, 1H), 3.48 – 3.43 (m, 1H), 2.99 – 2.76 (m, 1H), 2.54 – 2.30 (m, 2H), 2.10 – 1.86 (m, 2H);  $^{13}\text{C}$  NMR (101 MHz,  $\text{CDCl}_3$ )  $\delta$  164.3, 149.9, 148.1, 142.4, 142.1, 137.4, 128.9, 128.5, 128.4, 128.0, 126.9, 126.1, 125.9, 122.3, 45.6, 45.2, 35.3, 33.5. GC-MS (EI): Calcd for  $\text{C}_{22}\text{H}_{22}\text{N}_2\text{O}$ : 330.17, found: 330.20.

#### N-(2-phenethylhexyl)picolinamide (3y)

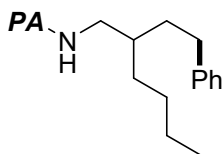

The title compound was isolated as green oil (87% yield) after chromatography on silica with ethyl acetate/hexane (1:6).  $^1\text{H}$  NMR (400 MHz,  $\text{CDCl}_3$ )  $\delta$  8.53 – 8.51 (m, 1H), 8.19 (dd,  $J = 4.8, 3.9$  Hz, 1H), 8.08 (br, 1H), 7.82 (m, 1H), 7.40 (m, 1H), 7.31 – 7.08 (m, 5H), 3.48 – 3.44 (m, 2H), 2.75 – 2.59 (m, 2H), 1.76 – 1.51 (m, 3H), 1.40 – 1.36 (m, 2H), 1.31 (m, 4H), 0.88 (t,  $J = 7.0$  Hz, 3H);  $^{13}\text{C}$  NMR (101 MHz,  $\text{CDCl}_3$ )  $\delta$  164.4, 150.1, 148.0, 142.6, 137.5, 128.5, 128.4, 126.1, 125.8, 122.3, 42.6, 37.9, 33.9, 33.1, 31.6, 28.9, 23.1, 14.2. GC-MS (EI): Calcd for  $\text{C}_{20}\text{H}_{26}\text{N}_2\text{O}$ : 310.20, found: 310.22.

#### N-(4-(3-(dimethylamino)phenyl)-3-methylbutyl)picolinamide (3z)

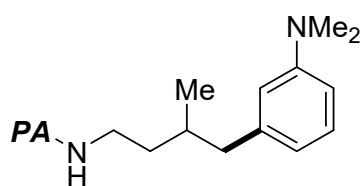

The title compound was isolated as green oil (65% yield) after chromatography on silica with ethyl acetate/hexane (1:6).  $^1\text{H}$  NMR (400 MHz,  $\text{CDCl}_3$ )  $\delta$  8.53 (dd,  $J = 4.7, 0.7$  Hz, 1H), 8.19 (d,  $J = 7.8$  Hz, 1H), 8.00 (br, 1H), 7.86 – 7.81 (m, 1H), 7.43 – 7.39 (m, 1H), 7.16 (t,  $J = 7.8$  Hz, 1H), 6.62 (m, 3H), 3.59 (m, 1H), 3.47 (m, 1H), 2.94 (s, 6H), 2.66 – 2.61 (m, 1H), 2.46 – 2.40 (m, 1H), 1.94 – 1.85 (m, 1H), 1.79 – 1.65 (m, 1H), 1.54 – 1.44 (m, 1H), 0.97 (d,  $J = 6.6$  Hz, 3H);  $^{13}\text{C}$  NMR (101 MHz,  $\text{CDCl}_3$ )  $\delta$  164.1, 150.6, 150.0, 148.0, 141.7, 137.3, 128.8, 126.0, 122.1, 117.8, 113.6, 110.4, 44.0, 40.7, 37.5, 36.3, 32.8, 19.5. GC-MS (EI): Calcd for  $\text{C}_{19}\text{H}_{25}\text{N}_3\text{O}$ : 311.20, found: 311.22.

#### N-(4-phenylnonyl)picolinamide (3aa) (from *Z*)

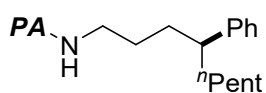

The title compound was isolated as brown oil (94% yield) after chromatography on silica with ethyl acetate/hexane (1:6).  $^1\text{H}$  NMR (400 MHz,  $\text{CDCl}_3$ )  $\delta$  8.52 – 8.50 (m, 1H), 8.18 (d,  $J = 7.8$  Hz, 1H), 7.97 (br, 1H), 7.84 – 7.80 (m, 1H), 7.41 – 7.37 (m, 1H), 7.33 – 7.23 (m, 2H), 7.22 – 7.09 (m, 3H), 3.53 – 3.30 (m, 2H), 2.61 – 2.34 (m, 1H), 1.79 – 1.70 (m, 1H), 1.66 – 1.48 (m, 4H), 1.47 – 1.36 (m, 1H), 1.31 – 1.07 (m, 6H), 0.81 (t,  $J = 6.8$  Hz, 3H);  $^{13}\text{C}$  NMR (101 MHz,  $\text{CDCl}_3$ )  $\delta$  164.2, 150.1, 148.0, 145.7, 137.4, 128.4, 127.7, 126.1, 126.0, 122.3, 45.9, 39.6, 37.0, 34.2, 32.0, 27.9, 27.3, 22.6, 14.1. GC-MS (EI): Calcd for  $\text{C}_{21}\text{H}_{28}\text{N}_2\text{O}$ : 324.22, found: 324.23.

#### N-(4-phenylnonyl)picolinamide (3ab) (from *E*)

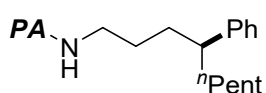

The title compound was isolated as brown oil (92% yield) after chromatography on silica with ethyl acetate/hexane (1:6).  $^1\text{H}$  NMR (400 MHz,  $\text{CDCl}_3$ )  $\delta$  8.50 (d,  $J = 4.7$  Hz, 1H), 8.16 (d,  $J = 7.8$  Hz, 1H), 7.99 (br, 1H), 7.82 – 7.77 (m, 1H), 7.39 – 7.35 (m, 1H), 7.26 (dd,  $J = 10.4, 4.4$  Hz, 2H), 7.21 – 7.04 (m, 3H), 3.42 – 3.35 (m, 2H), 2.52 – 2.47 (m, 1H), 1.78 – 1.69 (m, 1H), 1.64 – 1.48 (m, 3H), 1.45 – 1.32 (m, 1H), 1.29 – 0.98 (m, 7H), 0.80 (t,  $J = 6.8$  Hz, 3H);  $^{13}\text{C}$  NMR (101 MHz,  $\text{CDCl}_3$ )  $\delta$  164.3, 150.0, 148.0, 145.6, 137.4, 128.3, 127.7, 126.1, 126.0, 122.2, 45.8, 39.6, 37.0, 34.2, 31.9, 27.8, 27.3, 22.6, 14.1. GC-MS (EI): Calcd for  $\text{C}_{21}\text{H}_{28}\text{N}_2\text{O}$ : 324.22 found: 324.24.

#### N-(4-phenylhexyl)picolinamide (3ac) (from *Z*)



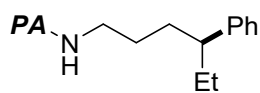

The title compound was isolated as brown oil (51% yield) after chromatography on silica with ethyl acetate/hexane (1:6). <sup>1</sup>H NMR (400 MHz, CDCl<sub>3</sub>) δ 8.52 (d, J = 4.7 Hz, 1H), 8.18 (d, J = 7.9 Hz, 1H), 7.96 (br, 1H), 7.83 (m, 1H), 7.44 – 7.36 (m, 1H), 7.31 – 7.23 (m, 2H), 7.22 – 7.08 (m, 3H), 3.55 – 3.32 (m, 2H), 2.52 – 2.33 (m, 1H), 1.88 – 1.69 (m, 2H), 1.63 – 1.57 (m, 2H), 1.52 (m, 2H), 0.76 (t, J = 7.4 Hz, 3H); <sup>13</sup>C NMR (101 MHz, CDCl<sub>3</sub>) δ 164.1, 150.0, 147.9, 145.3, 137.3, 128.3, 127.7, 126.0, 126.0, 122.1, 47.6, 39.4, 33.7, 29.7, 27.8, 12.1. GC-MS (EI): Calcd for C<sub>18</sub>H<sub>22</sub>N<sub>2</sub>O: 282.17, found: 282.22.

#### N-(4,4-diphenylbutyl)picolinamide (3ad) (from *E*)

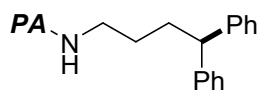

The title compound was isolated as brown oil (81% yield) after chromatography on silica with ethyl acetate/hexane (1:6). <sup>1</sup>H NMR (400 MHz, CDCl<sub>3</sub>) δ 8.51 (d, J = 4.0 Hz, 1H), 8.17 (d, J = 7.8 Hz, 1H), 8.03 (br, 1H), 7.82 (m, 1H), 7.44 – 7.36 (m, 1H), 7.30 – 7.20 (m, 8H), 7.20 – 7.05 (m, 2H), 3.93 (t, J = 7.9 Hz, 1H), 3.49 (m, 2H), 2.21 – 2.03 (m, 2H), 1.71 – 1.53 (m, 2H); <sup>13</sup>C NMR (101 MHz, CDCl<sub>3</sub>) δ 164.2, 150.0, 147.9, 144.7, 137.3, 128.5, 127.8, 126.2, 126.0, 122.2, 51.0, 39.3, 32.9, 28.3. GC-MS (EI): Calcd for C<sub>22</sub>H<sub>22</sub>N<sub>2</sub>O: 330.17, found: 330.20.

#### N-(4,5-diphenylpentyl)picolinamide (3ae) (from *E*)

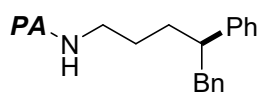

The title compound was isolated as yellow oil (65% yield) after chromatography on silica with ethyl acetate/hexane (1:6). <sup>1</sup>H NMR (400 MHz, CDCl<sub>3</sub>) δ 8.51 (d, J = 4.7 Hz, 1H), 8.18 (d, J = 7.8 Hz, 1H), 7.94 (br, 1H), 7.83 (m, 1H), 7.40 (m, 2H), 7.26 (t, J = 7.4 Hz, 3H), 7.18 (m, 3H), 7.15 – 7.08 (m, 3H), 7.06 – 6.95 (m, 2H), 3.47 – 3.29 (m, 2H), 3.01 – 2.71 (m, 3H), 1.86 – 1.64 (m, 2H), 1.56 – 1.37 (m, 2H); <sup>13</sup>C NMR (101 MHz, CDCl<sub>3</sub>) δ 164.2, 150.1, 148.0, 144.6, 140.5, 137.4, 129.2, 128.4, 128.1, 127.8, 126.3, 126.1, 125.9, 122.2, 47.8, 43.9, 39.4, 32.8, 27.8. GC-MS (EI): Calcd for C<sub>23</sub>H<sub>24</sub>N<sub>2</sub>O: 344.19, found: 344.22.

#### N-(4,6-diphenylhexyl)picolinamide (3af) (from *E*)

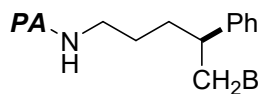

The title compound was isolated as yellow oil (95% yield) after chromatography on silica with ethyl acetate/hexane (1:6). <sup>1</sup>H NMR (400 MHz, CDCl<sub>3</sub>) δ 8.52 (m, 1H), 8.19 (dd, J = 7.8, 0.8 Hz, 1H), 8.00 (br, 1H), 7.82 (m, 1H),

7.40 (m, 1H), 7.33 (t,  $J = 7.4$  Hz, 2H), 7.25 (m, 3H), 7.22 – 7.16 (m, 3H), 7.13 – 7.05 (m, 2H), 3.52 – 3.29 (m, 2H), 2.68 – 2.52 (m, 1H), 2.50 – 2.41 (m, 2H), 2.02 – 1.87 (m, 2H), 1.84 – 1.75 (m, 1H), 1.73 – 1.62 (m, 1H), 1.60 – 1.50 (m, 1H), 1.49 – 1.36 (m, 1H).;  $^{13}\text{C}$  NMR (101 MHz,  $\text{CDCl}_3$ )  $\delta$  164.2, 150.0, 148.0, 145.0, 142.4, 137.3, 128.5, 128.4, 128.3, 127.8, 126.2, 126.0, 125.7, 122.2, 45.3, 39.4, 38.6, 34.3, 33.8, 27.8. GC-MS (EI): Calcd for  $\text{C}_{24}\text{H}_{26}\text{N}_2\text{O}$ : 358.20, found: 358.22.

**N-(5-methyl-4-phenylhexyl)picolinamide (3ag) (from *E*)**

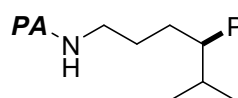

The title compound was isolated as yellow oil (92% yield) after chromatography on silica with ethyl acetate/hexane (1:6).  $^1\text{H}$  NMR (400 MHz,  $\text{CDCl}_3$ )  $\delta$  8.54 – 8.47 (m, 1H), 8.16 (dd,  $J = 4.8, 4.0$  Hz, 1H), 7.95 (br, 1H), 7.81 (m, 1H), 7.38 (m, 1H), 7.31 – 7.23 (m, 2H), 7.21 – 7.14 (m, 1H), 7.11 (dd,  $J = 5.1, 3.2$  Hz, 2H), 3.39 (m, 2H), 2.27 (m, 1H), 1.99 – 1.74 (m, 2H), 1.71 – 1.59 (m, 1H), 1.50 – 1.34 (m, 2H), 0.94 (d,  $J = 6.7$  Hz, 3H), 0.70 (d,  $J = 6.7$  Hz, 3H).;  $^{13}\text{C}$  NMR (101 MHz,  $\text{CDCl}_3$ )  $\delta$  164.2, 150.1, 148.0, 144.1, 137.3, 128.5, 128.1, 126.0, 126.0, 122.2, 52.9, 39.5, 33.5, 30.3, 28.1, 21.1, 20.8. GC-MS (EI): Calcd for  $\text{C}_{19}\text{H}_{24}\text{N}_2\text{O}$ : 296.19, found: 296.23.

**N-(4-cyclohexyl-4-phenylbutyl)picolinamide (3ah) (from *E*)**

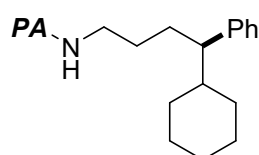

The title compound was isolated as yellow oil (57% yield) after chromatography on silica with ethyl acetate/hexane (1:6).  $^1\text{H}$  NMR (400 MHz,  $\text{CDCl}_3$ )  $\delta$  8.51 (d,  $J = 4.3$  Hz, 1H), 8.17 (d,  $J = 7.8$  Hz, 1H), 7.93 (br, 1H), 7.82 (m, 1H), 7.40 (dd,  $J = 6.6, 4.9$  Hz, 1H), 7.26 (t,  $J = 7.4$  Hz, 2H), 7.17 (t,  $J = 7.3$  Hz, 1H), 7.10 (d,  $J = 7.1$  Hz, 2H), 3.38 (m, 2H), 2.32 (m, 1H), 1.98 – 1.85 (m, 2H), 1.80 – 1.54 (m, 4H), 1.47 – 1.32 (m, 4H), 1.29 – 1.15 (m, 1H), 1.13 – 1.01 (m, 2H), 0.90 (m, 1H), 0.83 – 0.69 (m, 1H);  $^{13}\text{C}$  NMR (101 MHz,  $\text{CDCl}_3$ )  $\delta$  164.2, 150.1, 148.0, 144.3, 137.4, 128.6, 128.1, 126.1, 125.9, 122.2, 52.1, 43.3, 39.6, 31.5, 31.1, 30.0, 28.1, 26.6. GC-MS (EI): Calcd for  $\text{C}_{22}\text{H}_{28}\text{N}_2\text{O}$ : 336.22, found: 336.24.

**N-(2-(2-phenylcyclopentyl)ethyl)picolinamide (3ai)**

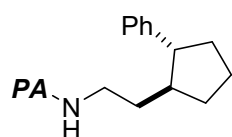

The title compound was isolated as yellow oil (89% yield) after chromatography on silica with ethyl acetate/hexane (1:6).  $^1\text{H}$  NMR (400 MHz,  $\text{CDCl}_3$ )  $\delta$  8.51 (d,  $J = 4.2$  Hz, 1H), 8.16 (d,  $J = 7.8$  Hz, 1H), 7.91

(br, 1H), 7.82 (m, 1H), 7.40 (m, 1H), 7.34 – 7.13 (m, 5H), 3.50 – 3.29 (m, 2H), 2.67 – 2.48 (m, 1H), 2.25 – 1.88 (m, 3H), 1.84 – 1.64 (m, 4H), 1.60 – 1.35 (m, 2H);  $^{13}\text{C}$  NMR (101 MHz,  $\text{CDCl}_3$ )  $\delta$  164.1, 150.0, 148.0, 145.2, 137.5, 128.5, 127.6, 126.2, 126.1, 122.3, 53.4, 53.4, 46.2, 46.2, 38.8, 38.8, 35.6, 35.6, 34.4, 32.4, 32.4, 32.3, 24.2, 24.2. GC-MS (EI): Calcd for  $\text{C}_{19}\text{H}_{22}\text{N}_2\text{O}$ : 294.17, found: 294.22.

### N-(2-(2-(3-(dimethylamino)phenyl)cyclohexyl)ethyl)picolinamide (3aj)

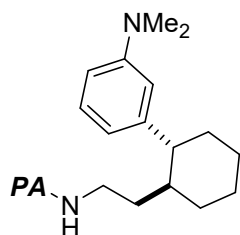

The title compound was isolated as yellow oil (54% yield) after chromatography on silica with ethyl acetate/hexane (1:6).  $^1\text{H}$  NMR (400 MHz,  $\text{CDCl}_3$ )  $\delta$  8.49 (d,  $J$  = 4.7 Hz, 1H), 8.15 (d,  $J$  = 7.8 Hz, 1H), 7.81 (m, 1H), 7.47 – 7.34 (m, 1H), 7.16 (t,  $J$  = 7.9 Hz, 1H), 6.72 – 6.46 (m, 3H), 3.45 (m, 1H), 3.29 (m, 1H), 2.93 (s, 6H), 2.18 (m, 1H), 2.12 – 2.01 (m, 1H), 1.93 – 1.76 (m, 3H), 1.71 – 1.60 (m, 1H), 1.59 – 1.41 (m, 2H), 1.40 – 1.31 (m, 2H), 1.30 – 1.23 (m, 1H), 1.11 (m, 1H);  $^{13}\text{C}$  NMR (101 MHz,  $\text{CDCl}_3$ )  $\delta$  164.1, 150.6, 150.1, 148.0, 147.4, 137.3, 129.2, 126.0, 122.1, 110.6, 51.5, 40.8, 40.2, 37.3, 36.2, 34.2, 32.8, 32.4, 26.9, 26.5. GC-MS (EI): Calcd for  $\text{C}_{22}\text{H}_{29}\text{N}_3\text{O}$ : 351.23, found: 351.24.

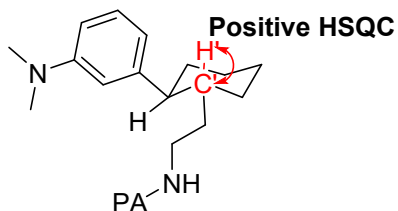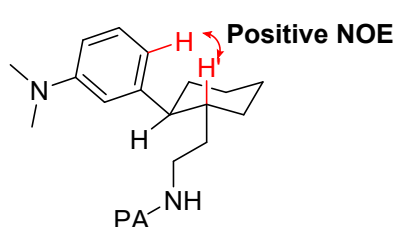

1D  $^{13}\text{C}$  DEPT 90 and 2D NMR analysis was used to determine the relative stereochemistry of the cyclic product. First, the chemical shift of C' was determined by 1D  $^{13}\text{C}$  DEPT 90. The H' was properly assigned in the  $^1\text{H}$  spectrum using HSQC to identify the positive correlation between the C' and the H'. Finally, the positive NOE correlation corresponding between the H' and the H, demonstrating they are on the same side of the ring, was observed, which indicating the Ni-Ph species underwent a syn-insertion process.

### N-(6,6-dimethyl-5-phenylheptyl)picolinamide (3ak) (from Z)

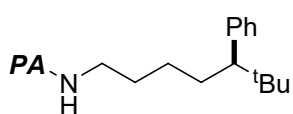

The title compound was isolated as yellow oil (78% yield) after chromatography on silica with ethyl acetate/hexane (1:6).  $^1\text{H}$  NMR (400 MHz,  $\text{CDCl}_3$ )  $\delta$  8.51 (d,  $J$  = 4.3 Hz, 1H), 8.18 (d,  $J$  = 7.8 Hz,

1H), 7.95 (br, 1H), 7.86 – 7.78 (m, 1H), 7.41 – 7.38 (m, 1H), 7.31 – 7.20 (m, 2H), 7.18 – 7.14 (m, 1H), 7.12 (dd, J = 6.5, 5.2 Hz, 2H), 3.49 – 3.09 (m, 2H), 2.31 (m, 1H), 1.88 – 1.69 (m, 2H), 1.64 – 1.43 (m, 2H), 1.20 – 1.08 (m, 2H), 0.85 (s, 9H); <sup>13</sup>C NMR (101 MHz, CDCl<sub>3</sub>) δ 164.1, 150.1, 147.9, 142.9, 137.2, 127.5, 125.9, 125.8, 122.1, 56.6, 39.30, 33.7, 29.6, 28.9, 28.3, 25.8. GC-MS (EI): Calcd for C<sub>21</sub>H<sub>28</sub>N<sub>2</sub>O: 324.22, found: 324.20.

#### N-(5,5-diphenylpentyl)picolinamide (3al) (from Z)

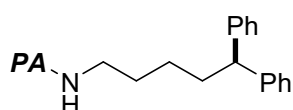

The title compound was isolated as yellow oil (77% yield) after chromatography on silica with ethyl acetate/hexane (1:6). <sup>1</sup>H NMR (400 MHz, CDCl<sub>3</sub>) δ 8.55 (d, J = 4.6 Hz, 1H), 8.21 (d, J = 7.8 Hz, 1H), 8.06 (br, 1H), 7.88 – 7.84(m, 1H), 7.48 – 7.39 (m, 1H), 7.35 – 7.23 (m, 8H), 7.22 – 7.13 (m, 2H), 3.92 (t, J = 7.8 Hz, 1H), 3.47 – 3.42 (m, 2H), 2.15 – 2.09 (m, 2H), 1.77 – 1.64 (m, 2H), 1.43 – 1.35 (m, 2H); <sup>13</sup>C NMR (101 MHz, CDCl<sub>3</sub>) δ 164.3, 149.8, 146.3, 141.3, 141.0, 137.9, 130.3, 129.5, 129.4, 128.6, 128.5, 128.1, 128.0, 127.9, 124.7, 119.0, 65.5, 43.4, 37.8, 36.2, 33.0. GC-MS (EI): Calcd for C<sub>23</sub>H<sub>24</sub>N<sub>2</sub>O: 344.19, found: 344.22.

#### N-(2,2-dimethyl-5-phenylpentyl)picolinamide (3am)

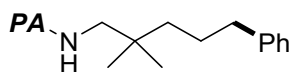

The title compound was isolated as yellow oil (90% yield) after chromatography on silica with ethyl acetate/hexane (1:8). <sup>1</sup>H NMR (400 MHz, CDCl<sub>3</sub>) δ 8.55 (d, J = 4.0 Hz, 1H), 8.21 (d, J = 7.8 Hz, 1H), 8.16 (br, 1H), 7.82 – 7.86(m, 1H), 7.43 – 7.41(m, 1H), 7.31 – 7.22 (m, 2H), 7.19 – 7.14(m, 3H), 3.30 (d, J = 6.6 Hz, 2H), 2.60 (t, J = 7.7 Hz, 2H), 1.77 – 1.58 (m, 2H), 1.42 – 1.31 (m, 2H), 0.95 (s, 6H); <sup>13</sup>C NMR (101 MHz, CDCl<sub>3</sub>) δ 164.4, 150.1, 148.1, 142.6, 137.4, 128.4, 128.3, 127.8, 126.1, 125.7, 122.3, 49.2, 39.7, 36.7, 34.6, 29.7, 26.0, 25.1. GC-MS (EI): Calcd for C<sub>19</sub>H<sub>24</sub>N<sub>2</sub>O: 296.19, found: 296.22.

## 5. Synthetic Utilities

To further demonstrate the synthetic utility of our strategy, a gram scale reaction was first conducted. As depicted in Scheme S1-A, the desired **3a** could be isolated with 94% yield under standard conditions (1.25 g). Furthermore, the PA auxiliary can be facilely removed under the conditions of base,<sup>16</sup> providing a new way for the preparation of **4a** that can act as a [<sup>3</sup>H]tryptamine binding inhibitor (Scheme S1-B).<sup>2c</sup> Eventually, our method can be applied for the modification of bioactive derivatives. For the use of arylboronic acids **2w–2x** derived from estrone and tyrosine, bearing with different functional group as arylation source, they all proceeded smoothly and products **5a–5b** could be isolated with good yields, highlighting the synthetic potential of our strategy (Scheme S1-C).

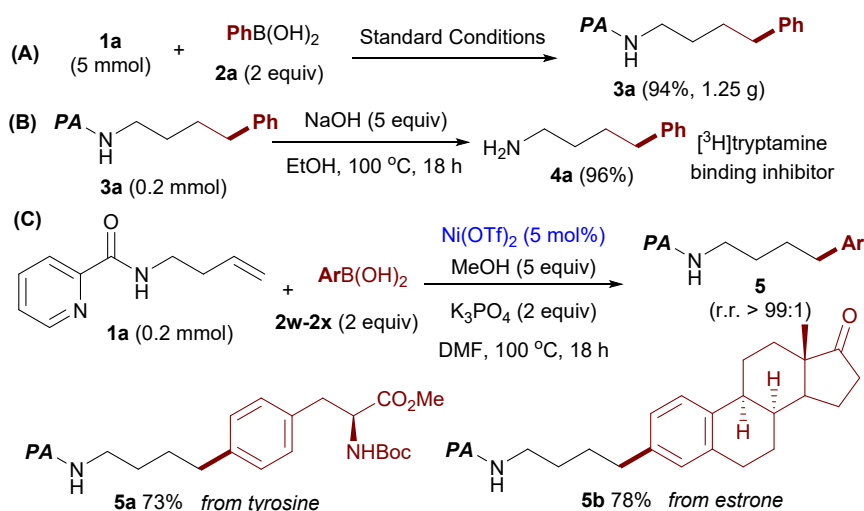

**Scheme S1** Synthetic utilities.

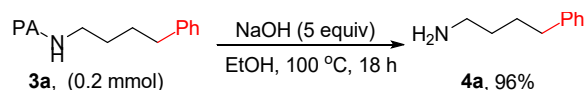

Removal of picolinic acid directing group was carried out by adapting a literature procedure.<sup>[2]</sup> To an oven-dried schlenk flask was added the hydroarylation product **3a** (0.2 mmol, 1.0 eq), NaOH (1 mmol, 5 eq), and EtOH (1 mL). The resulting mixture was stirred at 100 °C for 18 h. After this time, the reaction mixture was allowed to cool to room temperature, diluted by addition of EtOAc (5 mL) and H<sub>2</sub>O (2 mL × 2). The aqueous layers

were combined and extracted with EtOAc (10 mL × 2). The organic layers were combined, dried over Na<sub>2</sub>SO<sub>4</sub>, and concentrated in vacuo to give pure primary amine product.

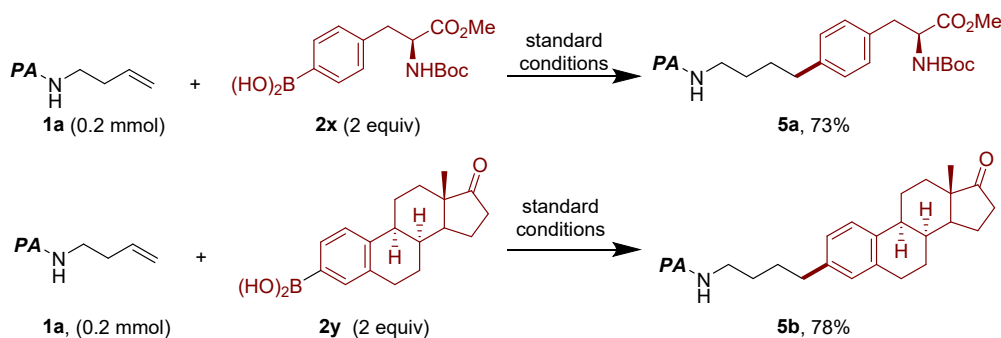

#### 4-Phenylbutan-1-amine (4a)

NCCCCc1ccccc1 The title compound was obtained as colorless oil (96% yield). <sup>1</sup>H NMR (400 MHz, CDCl<sub>3</sub>) δ 7.28 – 7.18 (m, 5H), 2.73 (t, J = 7.1 Hz, 2H), 2.62 (t, J = 7.6 Hz, 2H), 1.71 – 1.40 (m, 6H). The NMR spectras of the product **4a** match the previously described in literature. [3]

#### Methyl (S)-2-(((tert-butoxycarbonyl)amino)-3-(4-(4-(picolinamido)butyl)phenyl)propanoate (5a)

COC(=O)C(NC(=O)OC(C)(C)C)Cc1ccc(cc1)CCCCNC The title compound was isolated as yellow oil (73% yield) after chromatography on silica with ethyl acetate/hexane (1:8). <sup>1</sup>H NMR (400 MHz, CDCl<sub>3</sub>) δ 8.51 (dd, J = 4.7, 0.7 Hz, 1H), 8.17 (d, J = 7.8 Hz, 1H), 8.05 (br 1H), 7.81 (t, J = 7.7 Hz, 1H), 7.44 – 7.35 (m, 1H), 7.08 (d, J = 7.8 Hz, 2H), 7.01 (d, J = 7.8 Hz, 2H), 4.65 – 4.42 (m, 1H), 3.68 (s, 3H), 3.47 (m, 2H), 3.06 – 2.97 (m, 2H), 2.61 (t, J = 7.0 Hz, 2H), 1.73 – 1.58 (m, 4H), 1.38 (s, 9H); <sup>13</sup>C NMR (101 MHz, CDCl<sub>3</sub>) δ 172.4, 164.3, 155.1, 150.0, 148.0, 140.9, 137.4, 133.4, 129.3, 128.6, 126.1, 122.2, 79.9, 54.5, 52.2, 39.3, 37.9, 35.1, 29.3, 28.7, 28.3. HRMS (ESI) m/z calculated for C<sub>25</sub>H<sub>33</sub>N<sub>3</sub>O<sub>5</sub> [M+Na]<sup>+</sup> 478.2312, found: 478.2312.

**N-(4-((8*R*,9*S*,13*S*)-13-methyl-17-oxo-7,8,9,11,12,13,14,15,16,17-decahydro-6*H*-cyclopenta[*a*]phenanthren-3-yl)butyl)picolinamide (5b)**

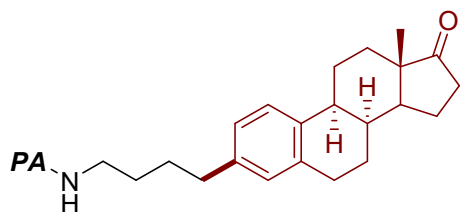

The title compound was isolated as yellow oil (78% yield) after chromatography on silica with ethyl acetate/hexane (1:8). <sup>1</sup>H NMR (400 MHz, CDCl<sub>3</sub>) δ 8.53 (d, *J* = 4.6 Hz, 1H), 8.19 (d, *J* = 7.8 Hz, 1H), 8.06 (br, 1H), 7.84 (t, *J* = 7.7 Hz, 1H), 7.41 (dd, *J* = 7.5, 4.8 Hz, 1H), 7.20 (d, *J* = 7.9 Hz, 1H), 6.98 (d, *J* = 8.0 Hz, 1H), 6.92 (s, 1H), 3.50 (m, 2H), 2.93 – 2.77 (m, 2H), 2.61 (t, *J* = 7.0 Hz, 2H), 2.53 – 2.46 (m, 1H), 2.45 – 2.34 (m, 1H), 2.27 (t, *J* = 10.4 Hz, 1H), 2.20 – 2.09 (m, 1H), 2.08 – 1.85 (m, 3H), 1.78 – 1.68 (m, 4H), 1.61 (d, *J* = 11.5 Hz, 2H), 1.53 – 1.46 (m, 2H), 1.42 (t, *J* = 4.9 Hz, 1H), 1.26 (t, *J* = 6.9 Hz, 1H), 0.90 (s, 3H).; <sup>13</sup>C NMR (101 MHz, CDCl<sub>3</sub>) δ 164.3, 150.1, 148.0, 139.6, 137.4, 137.2, 136.4, 129.1, 126.1, 125.9, 125.3, 122.2, 53.5, 50.6, 48.1, 44.4, 39.4, 38.3, 35.9, 35.0, 31.7, 29.4, 29.4, 28.8, 26.6, 25.8, 21.6, 13.9. HRMS (ESI) *m/z* calculated for C<sub>28</sub>H<sub>34</sub>N<sub>2</sub>O<sub>2</sub> [M+Na]<sup>+</sup> 453.2512, found: 453.2512.

## 6. Deuterium Labelling Experiment

To further study the reaction mechanism, deuterium labelling experiment has been conducted. The sum of deuterium was less than one, suggesting that the proton source might come from MeOH and H<sub>2</sub>O (probably formed *in situ* via the trimerization of PhB(OH)<sub>2</sub>).

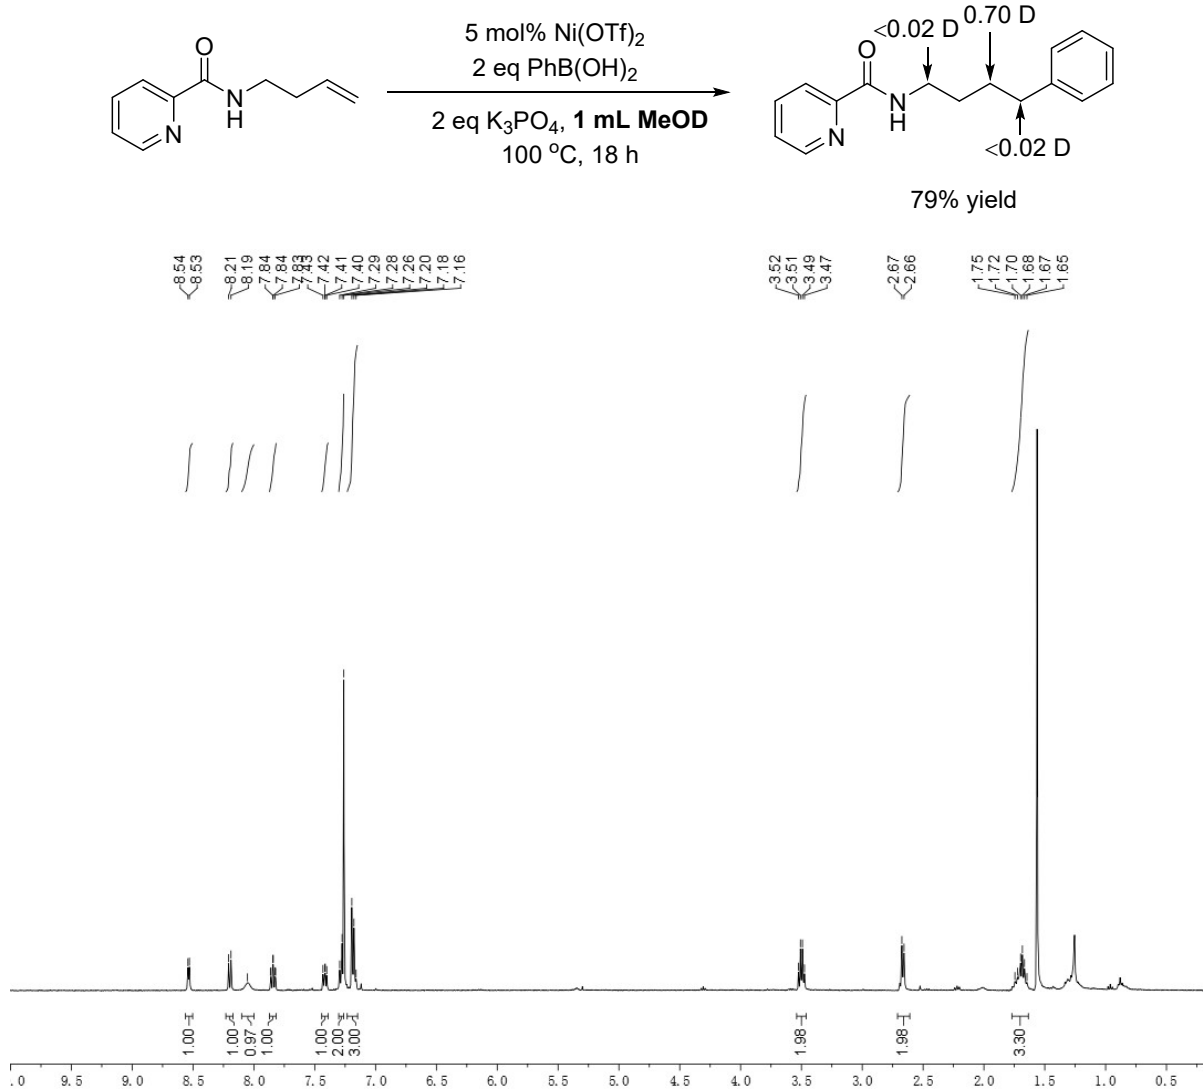

## 7. References

- [1] B. S. Schreib, M. Fadel, E. M. Carreira, *Angew. Chem. Int. Ed.* **2020**, *59*, 7818.
- [2] J. Derosa, V. T. Tran, M. N. Boulous, J. S. Chen, K. M. Engle, *J. Am. Chem. Soc.* **2017**, *139*, 10657.
- [3] Y. Shimizu, H. Morimoto, M. Zhang, T. Ohshima, *Angew. Chem. Int. Ed.* **2012**, *51*, 8564.



## 8. NMR Spectra

$^1\text{H}$  NMR (400 MHz,  $\text{CDCl}_3$ ) of **S-E-1j**

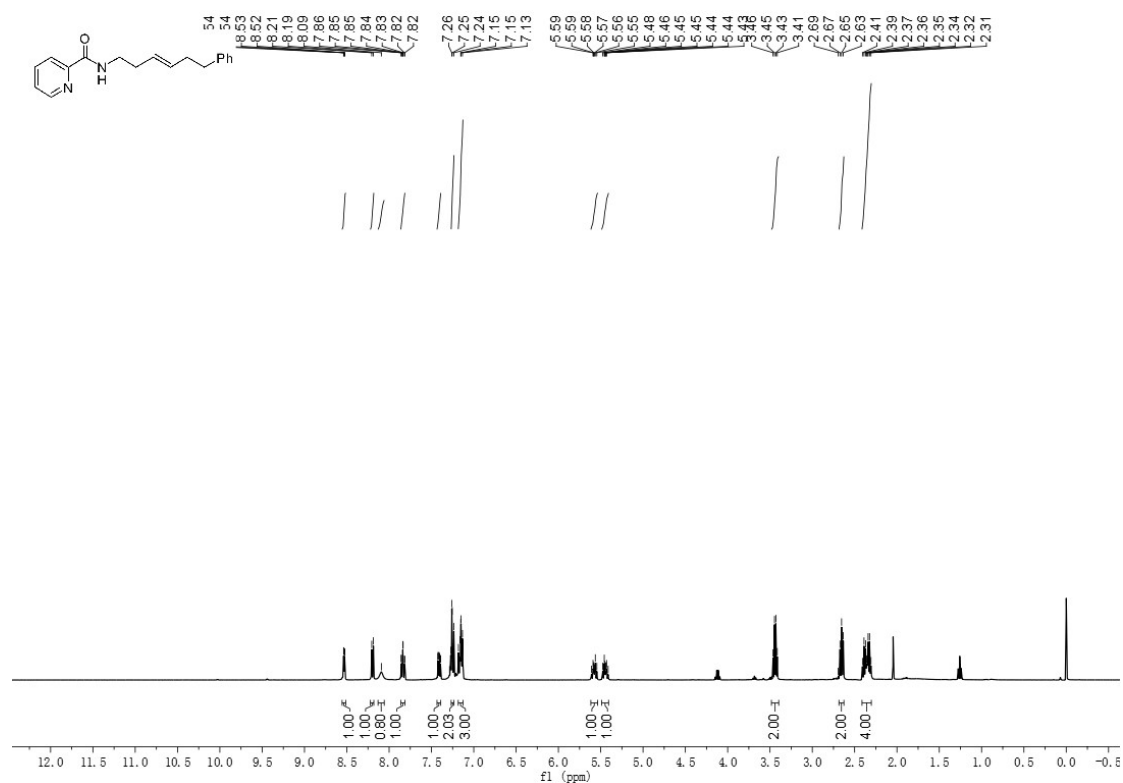

$^{13}\text{C}$  NMR (101 MHz,  $\text{CDCl}_3$ ) of **S-E-1j**

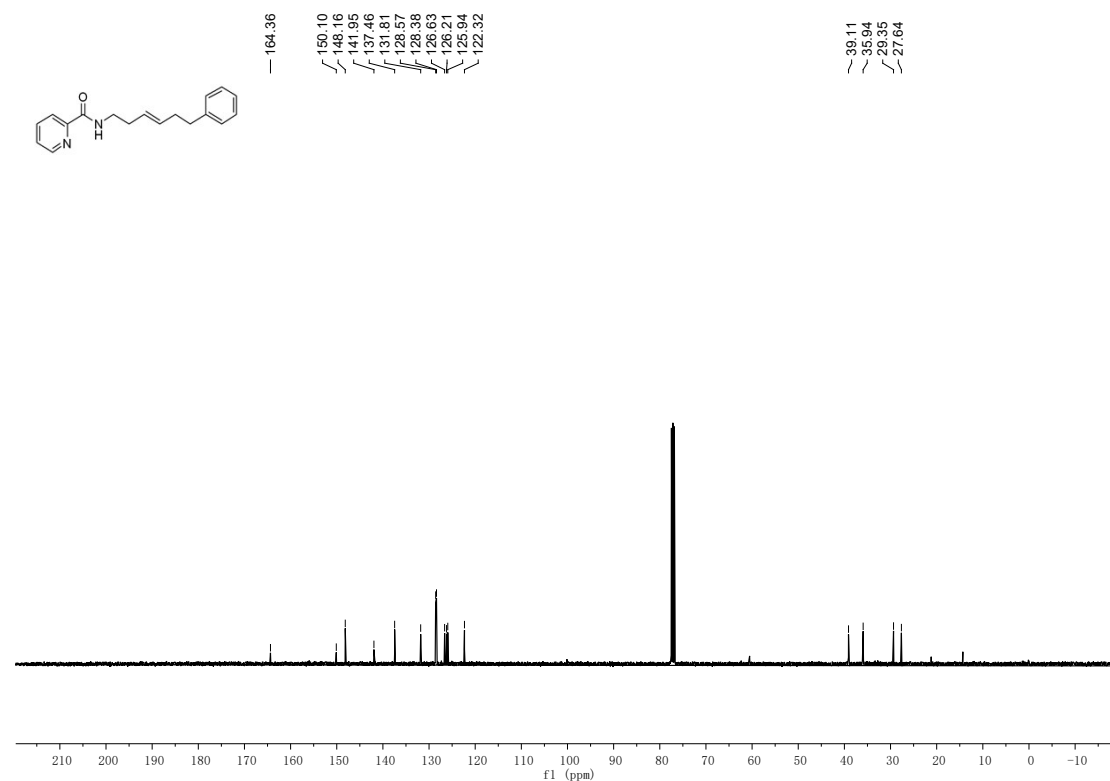

<sup>1</sup>H NMR (400 MHz, CDCl<sub>3</sub>) of **S-E-11**

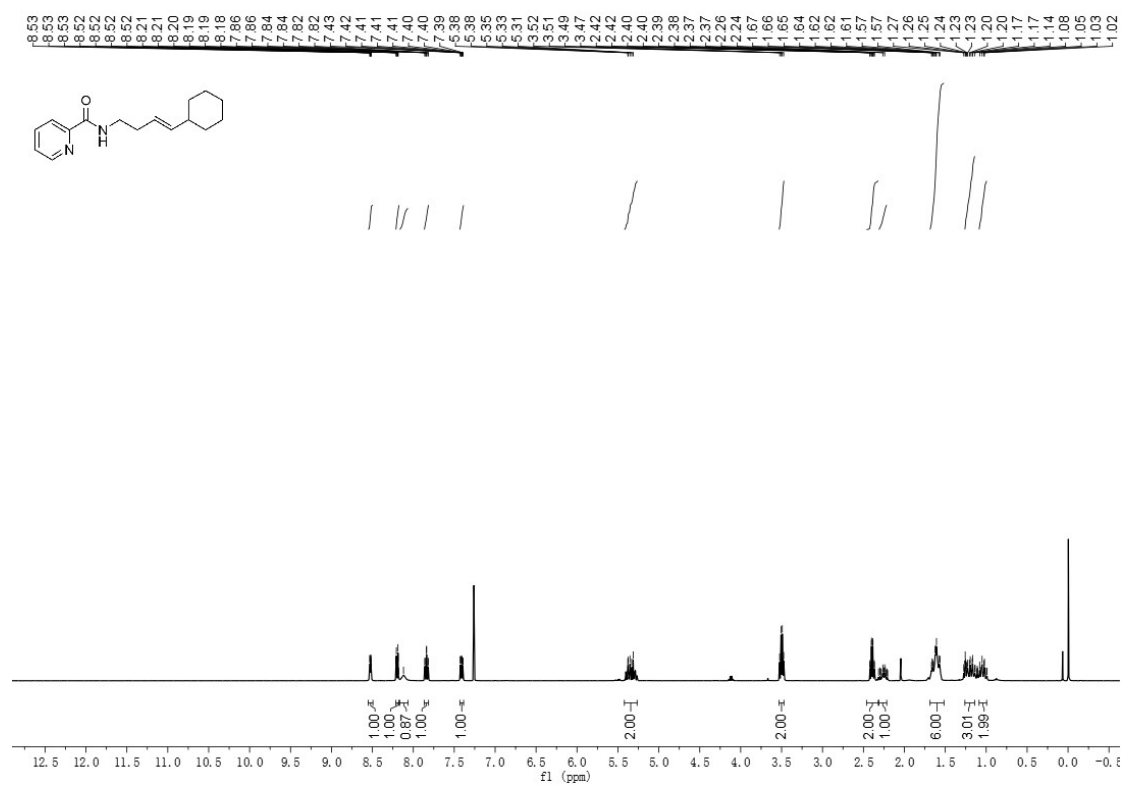

<sup>13</sup>C NMR (101 MHz, CDCl<sub>3</sub>) of **S-E-11**

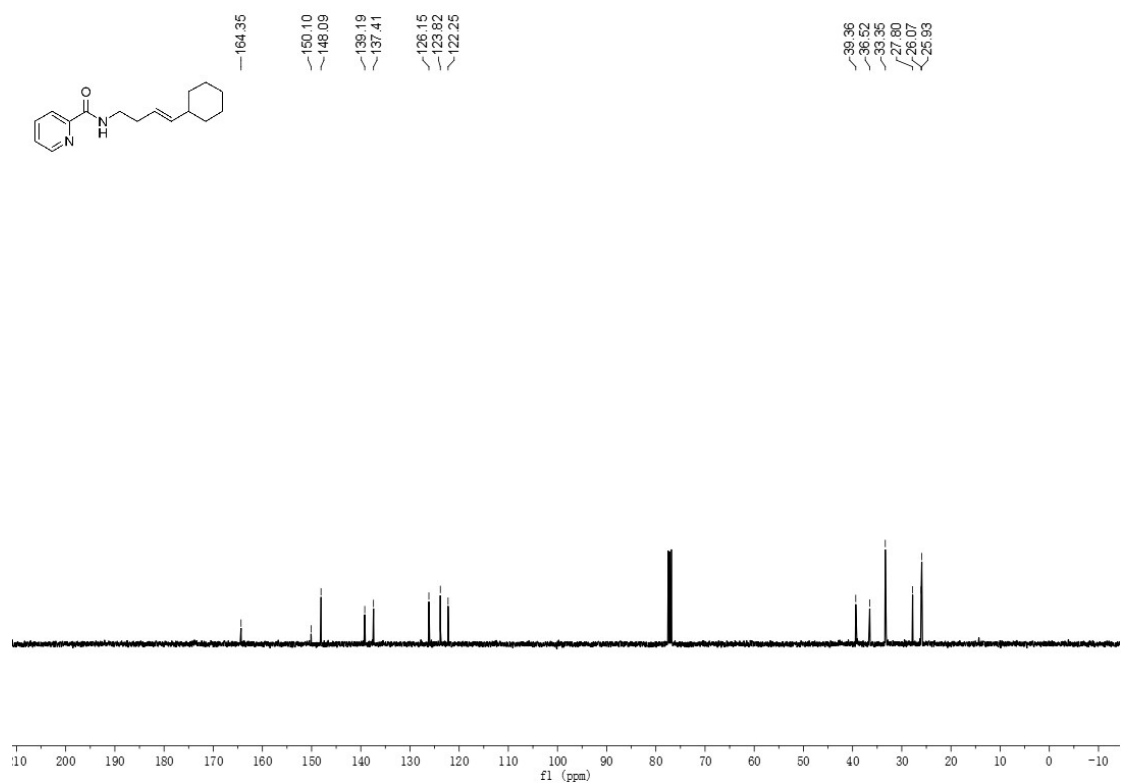

<sup>1</sup>H NMR (400 MHz, CDCl<sub>3</sub>) of **3a**

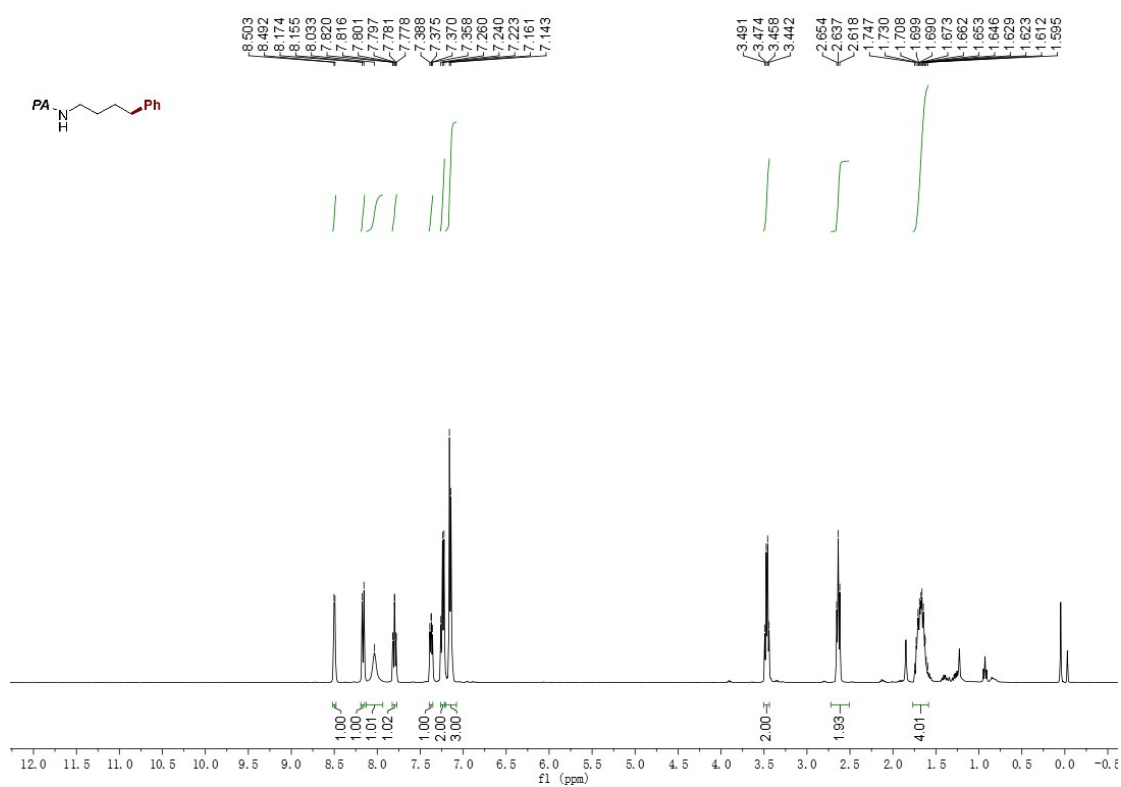

<sup>13</sup>C NMR (101 MHz, CDCl<sub>3</sub>) of **3a**

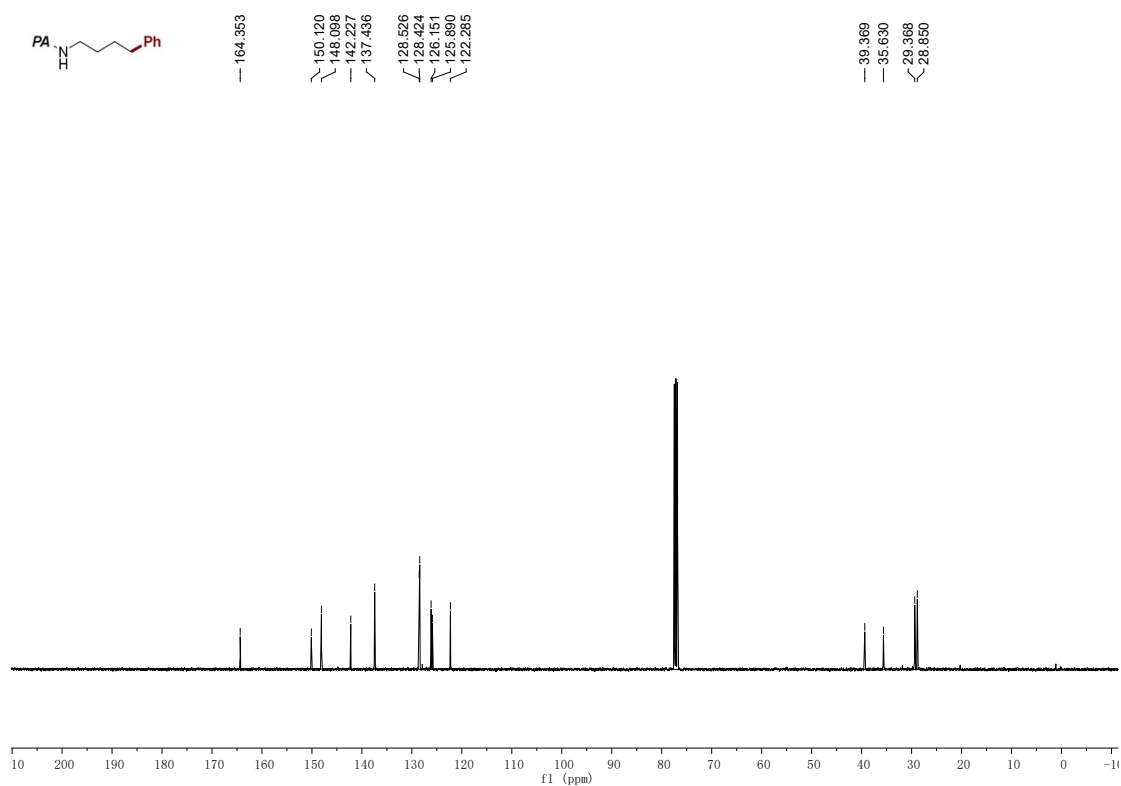

$^1\text{H}$  NMR (400 MHz,  $\text{CDCl}_3$ ) of **3b**

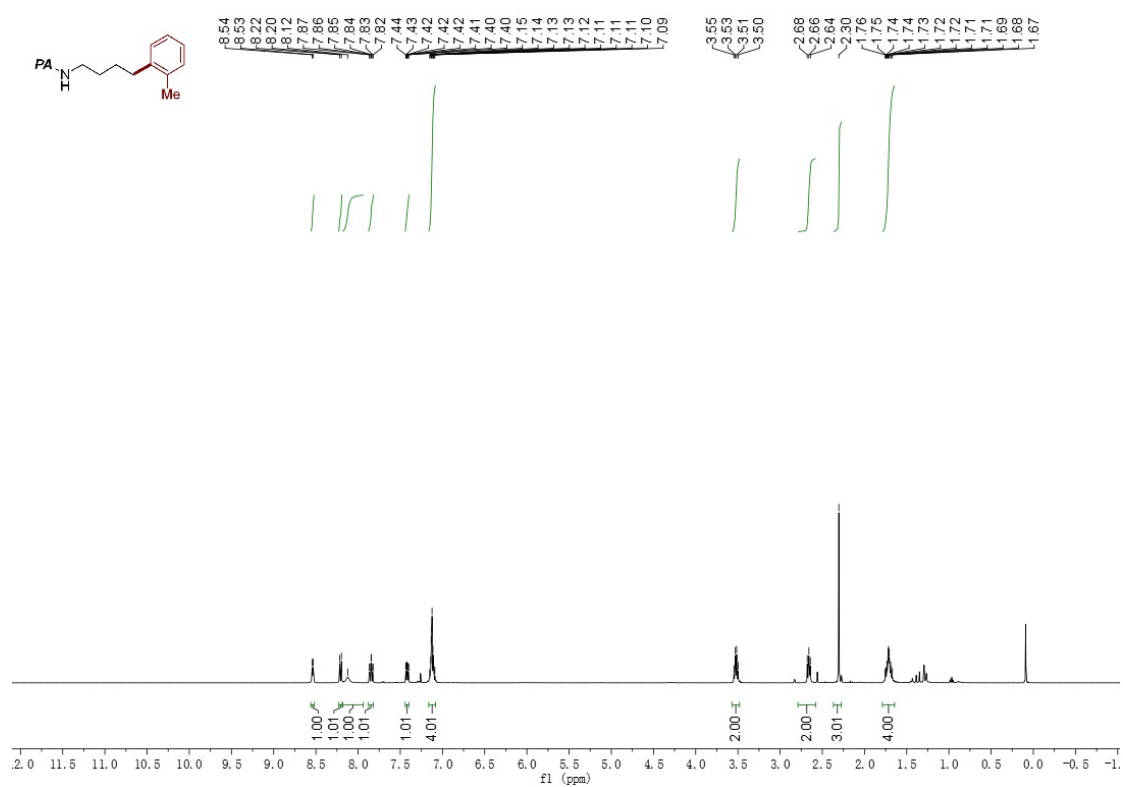

$^{13}\text{C}$  NMR (101 MHz,  $\text{CDCl}_3$ ) of **3b**

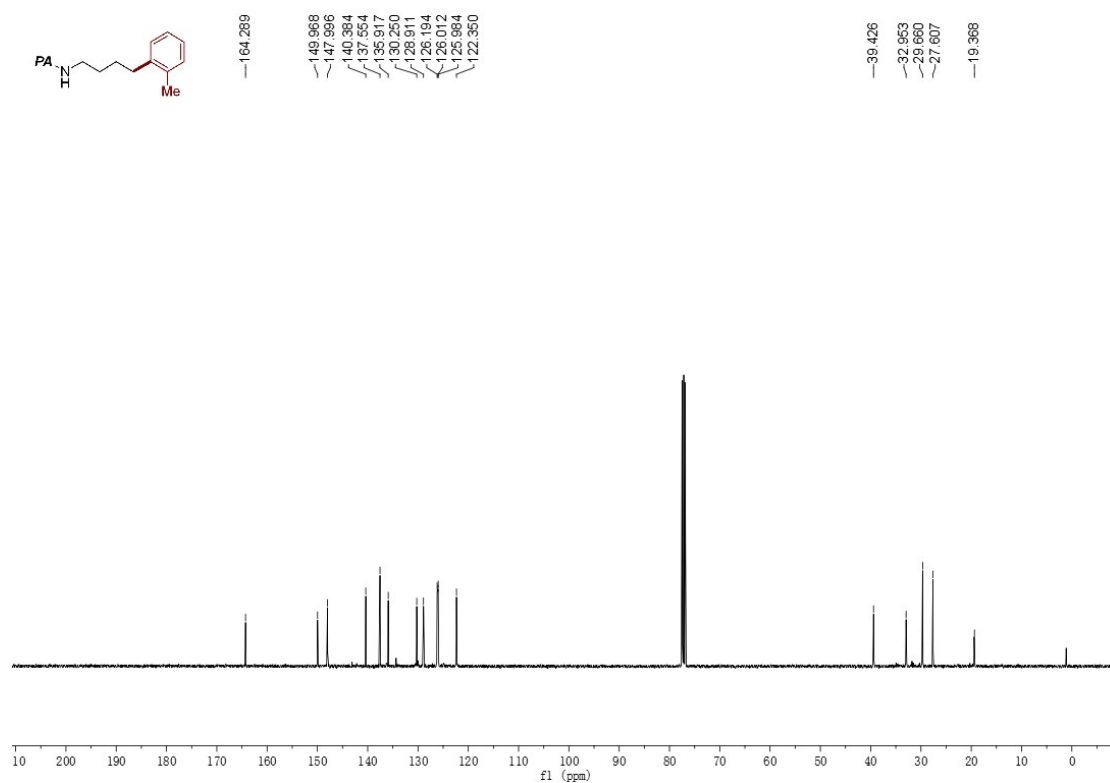

$^1\text{H}$  NMR (400 MHz,  $\text{CDCl}_3$ ) of **3c**

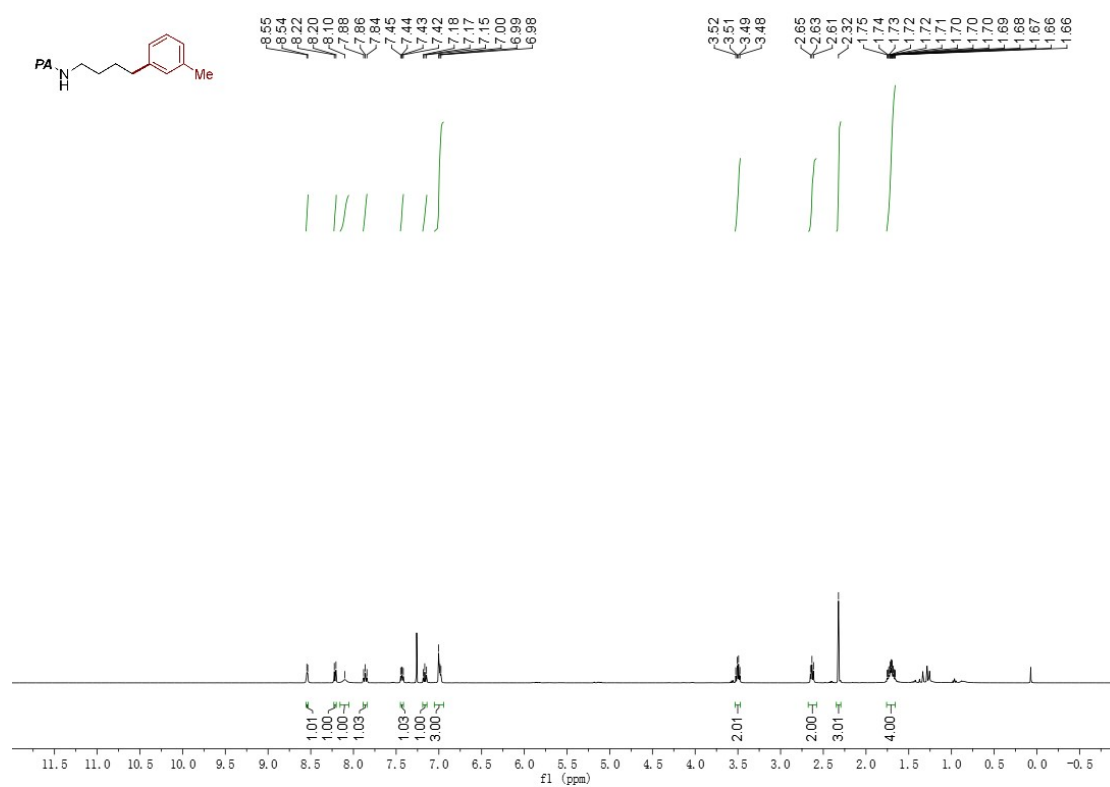

$^{13}\text{C}$  NMR (101 MHz,  $\text{CDCl}_3$ ) of **3c**

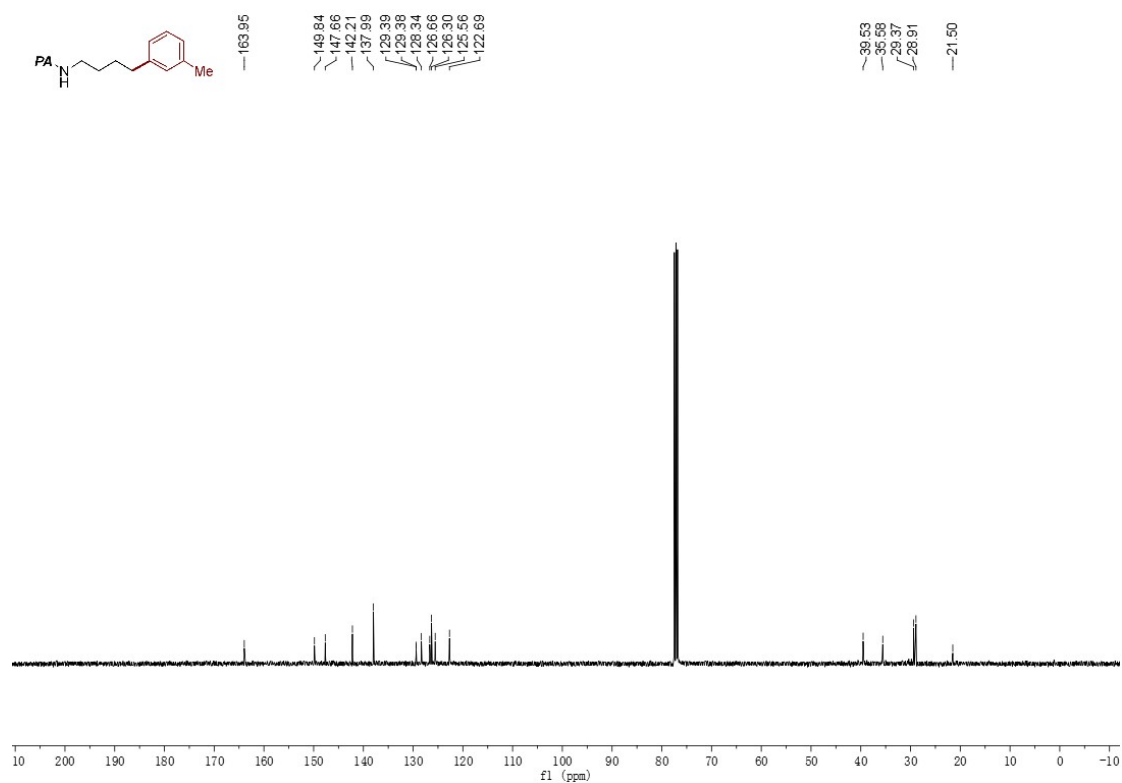

$^1\text{H}$  NMR (400 MHz,  $\text{CDCl}_3$ ) of **3d**

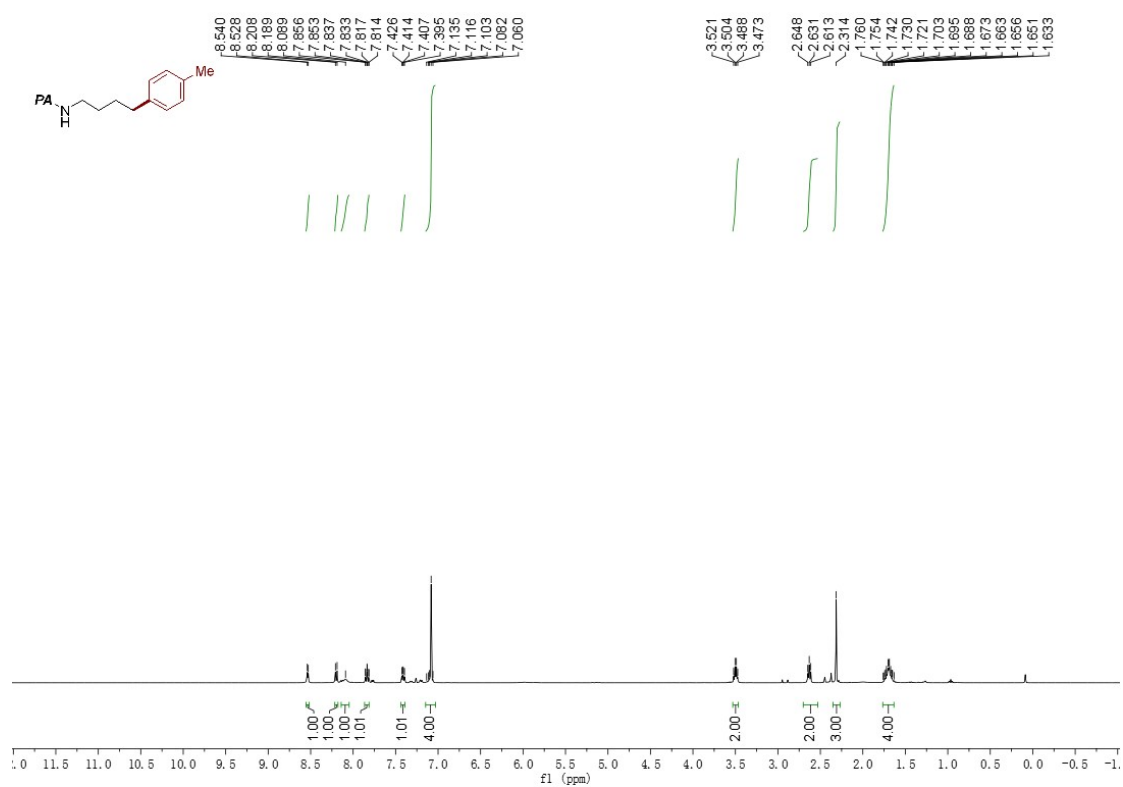

$^{13}\text{C}$  NMR (101 MHz,  $\text{CDCl}_3$ ) of **3d**

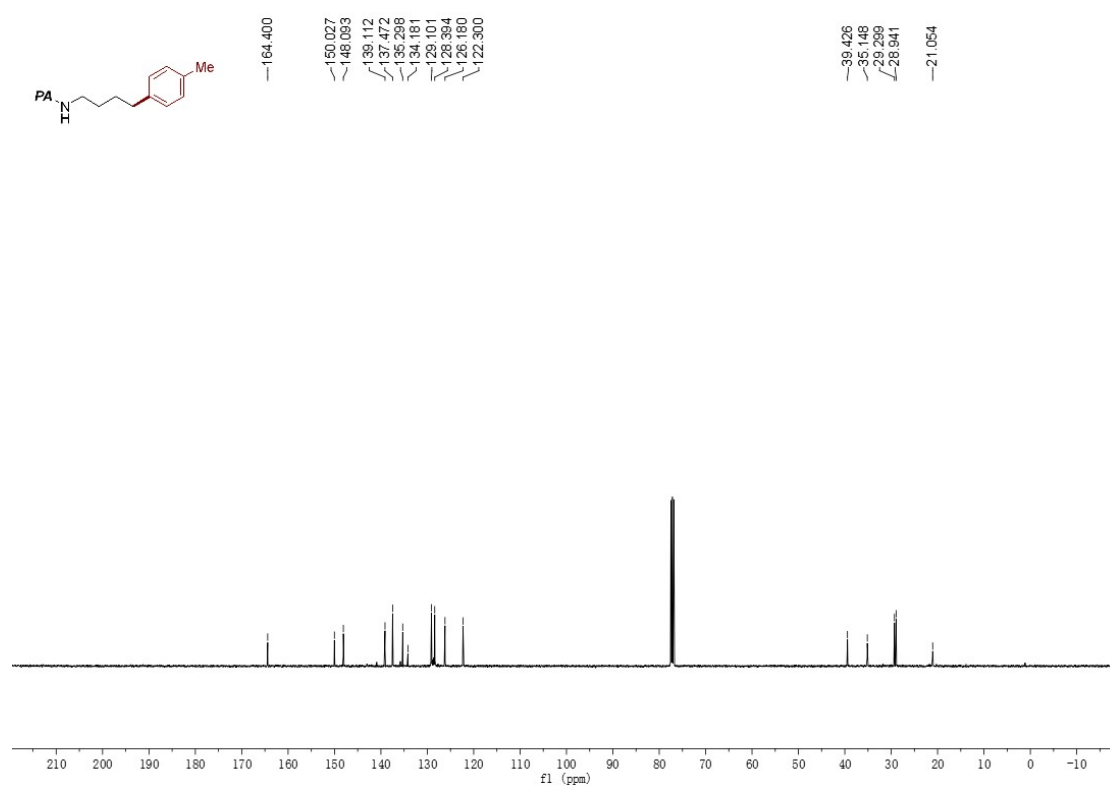

$^1\text{H}$  NMR (400 MHz,  $\text{CDCl}_3$ ) of **3e**

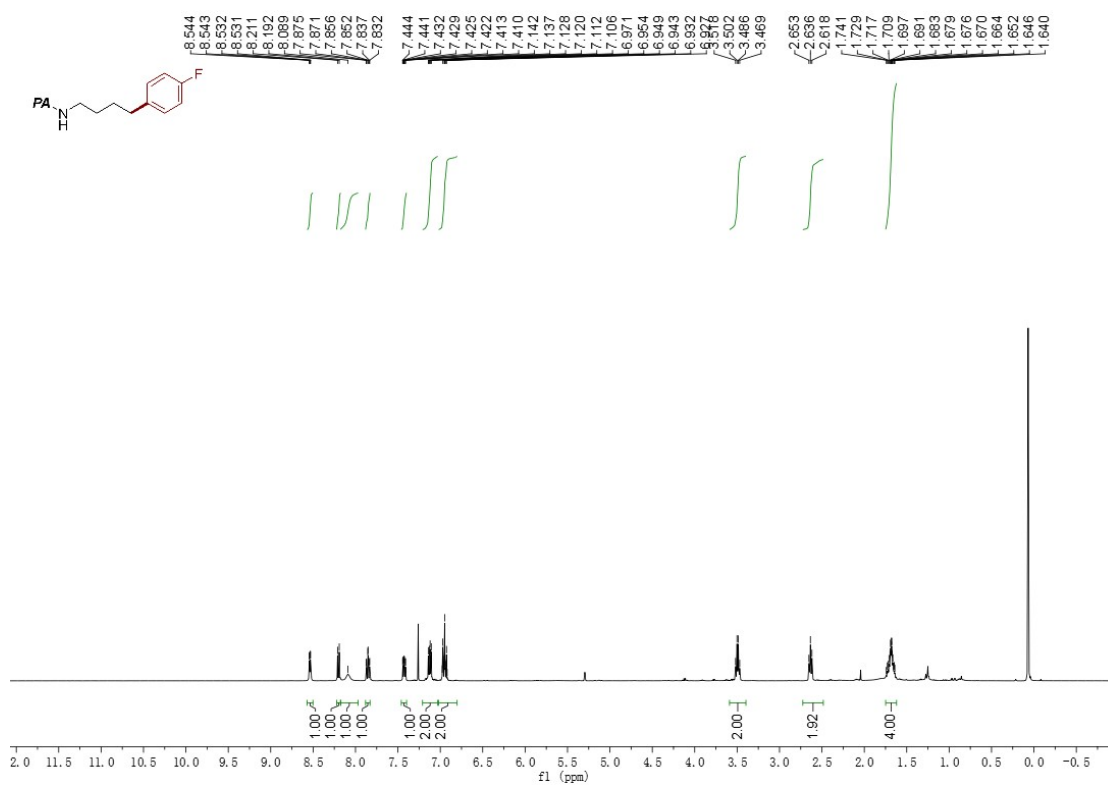

$^{13}\text{C}$  NMR (101 MHz,  $\text{CDCl}_3$ ) of **3e**

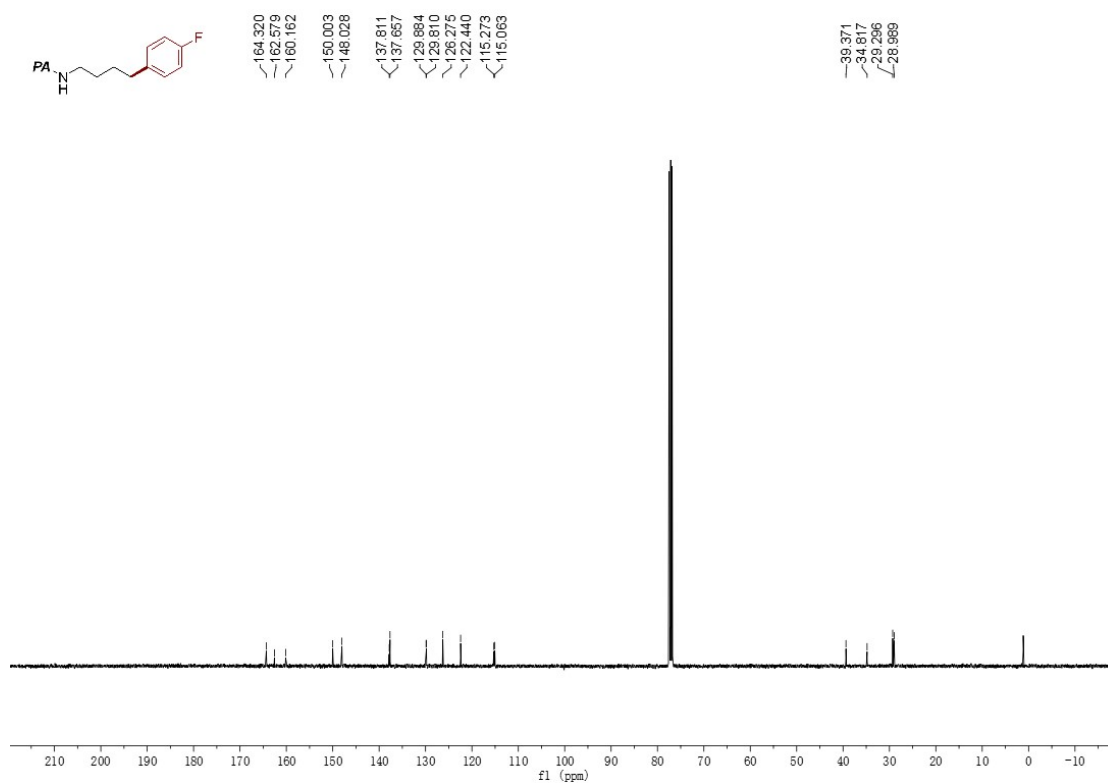

$^1\text{H}$  NMR (400 MHz,  $\text{CDCl}_3$ ) of **3f**

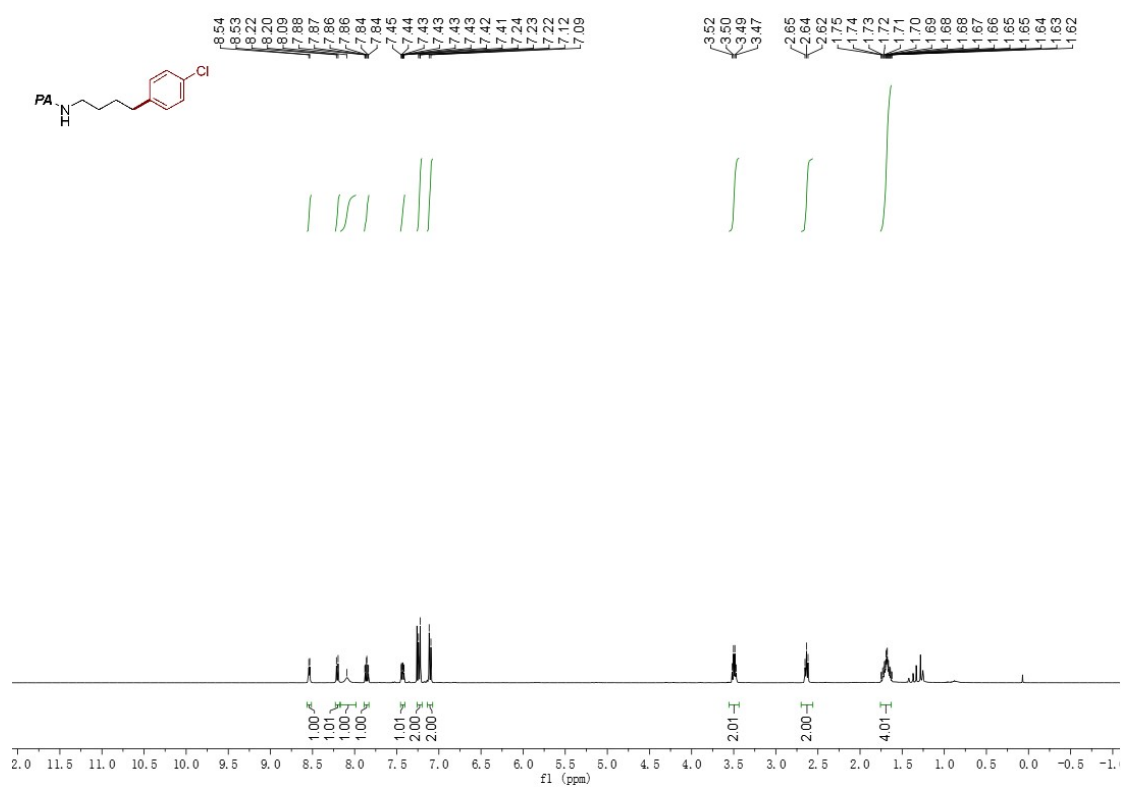

$^{13}\text{C}$  NMR (101 MHz,  $\text{CDCl}_3$ ) of **3f**

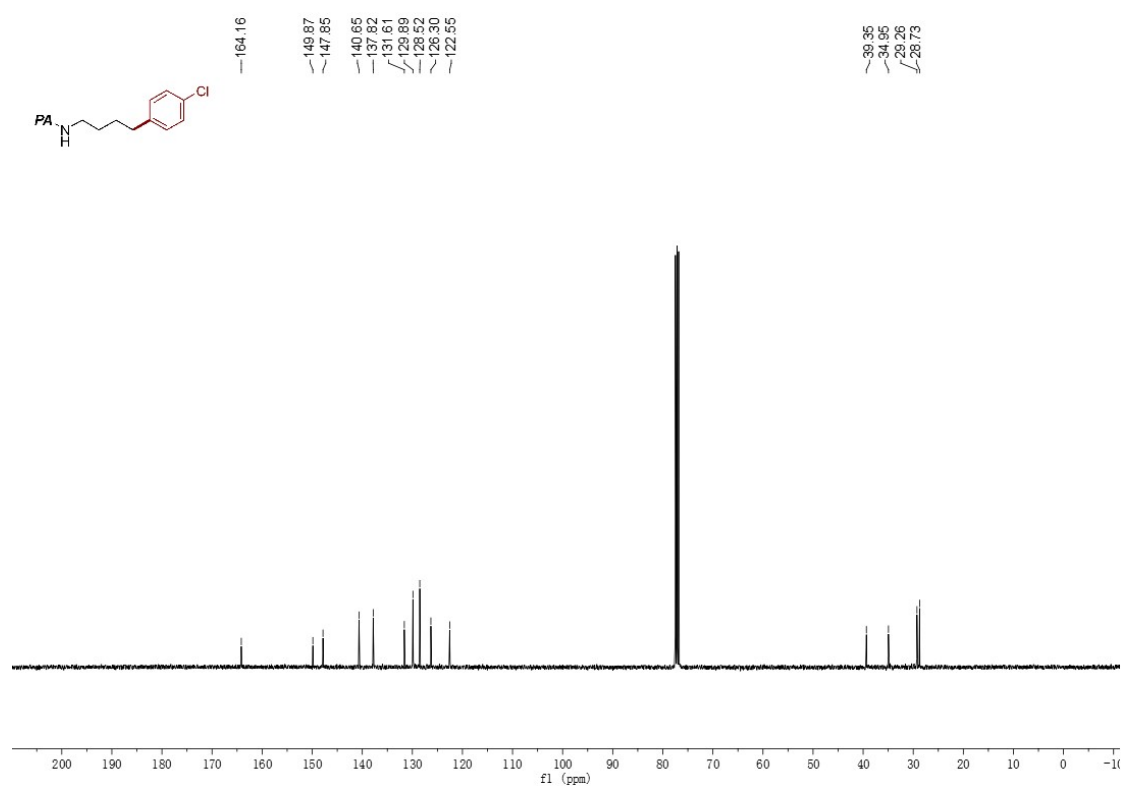



$^1\text{H}$  NMR (400 MHz,  $\text{CDCl}_3$ ) of **3g**

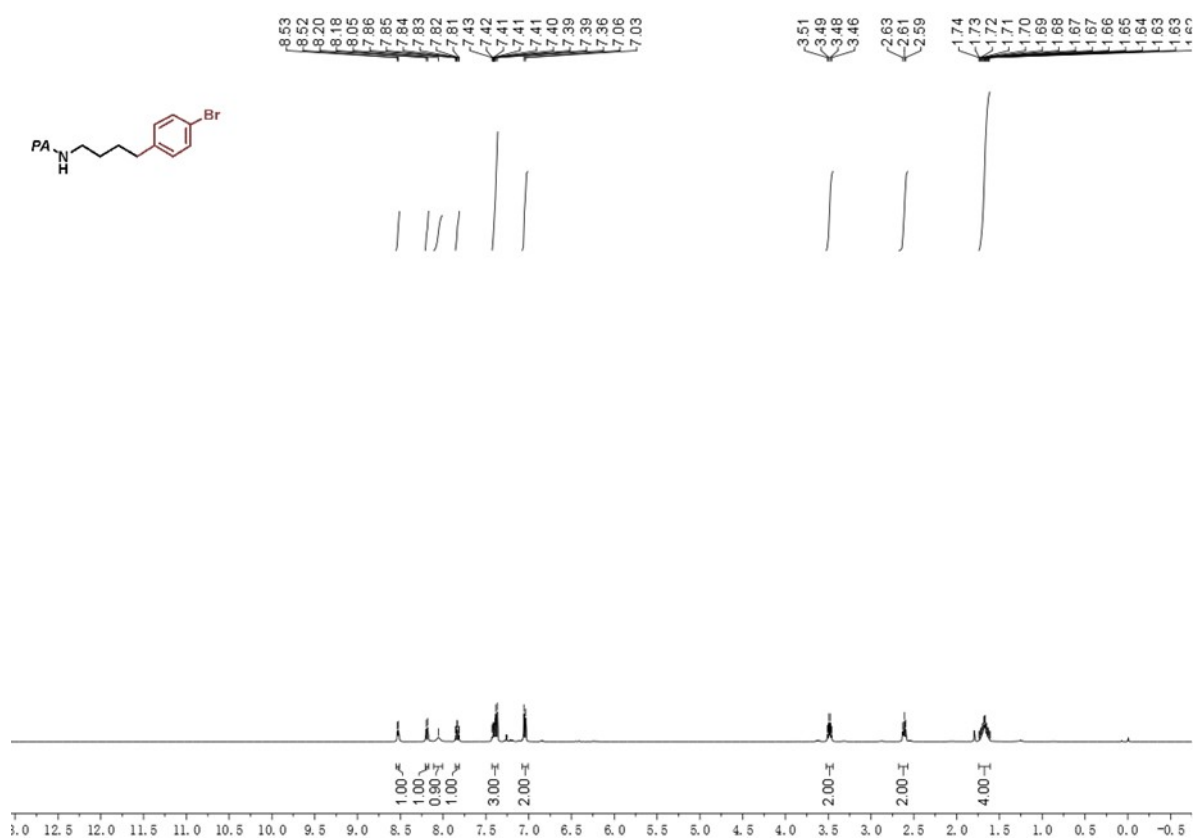

$^{13}\text{C}$  NMR (101 MHz,  $\text{CDCl}_3$ ) of **3g**

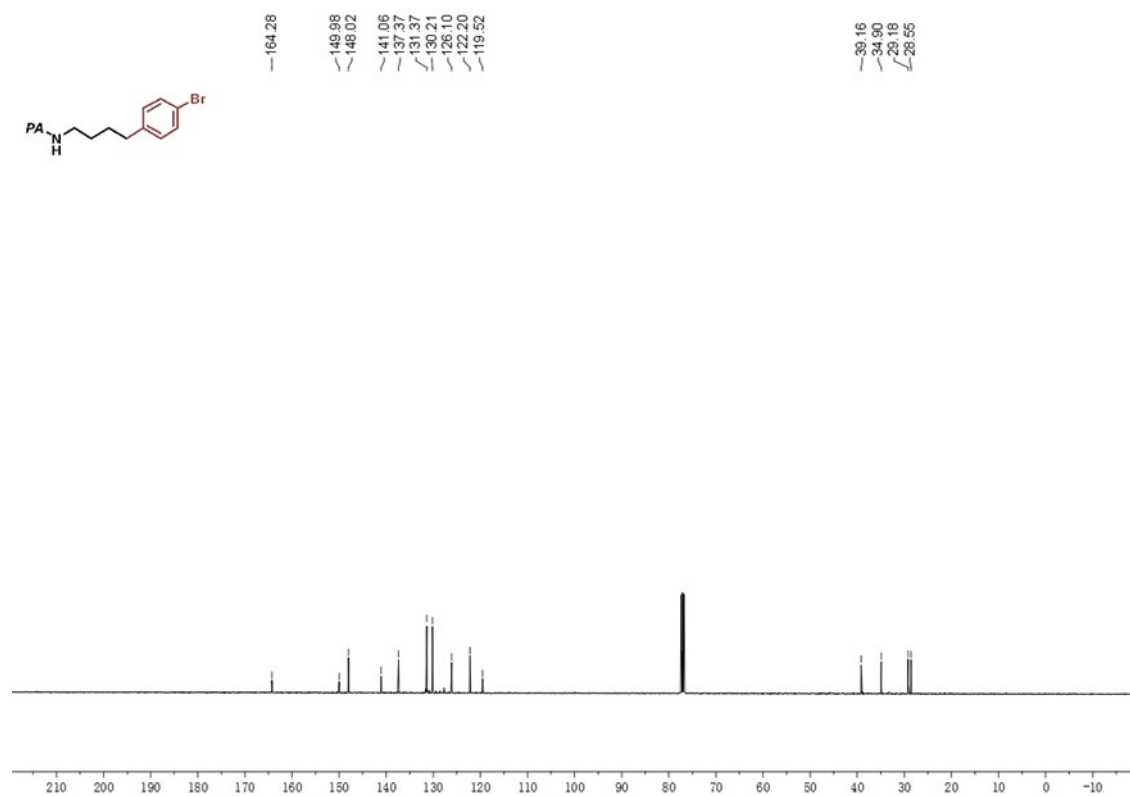

$^1\text{H}$  NMR (400 MHz,  $\text{CDCl}_3$ ) of **3h**

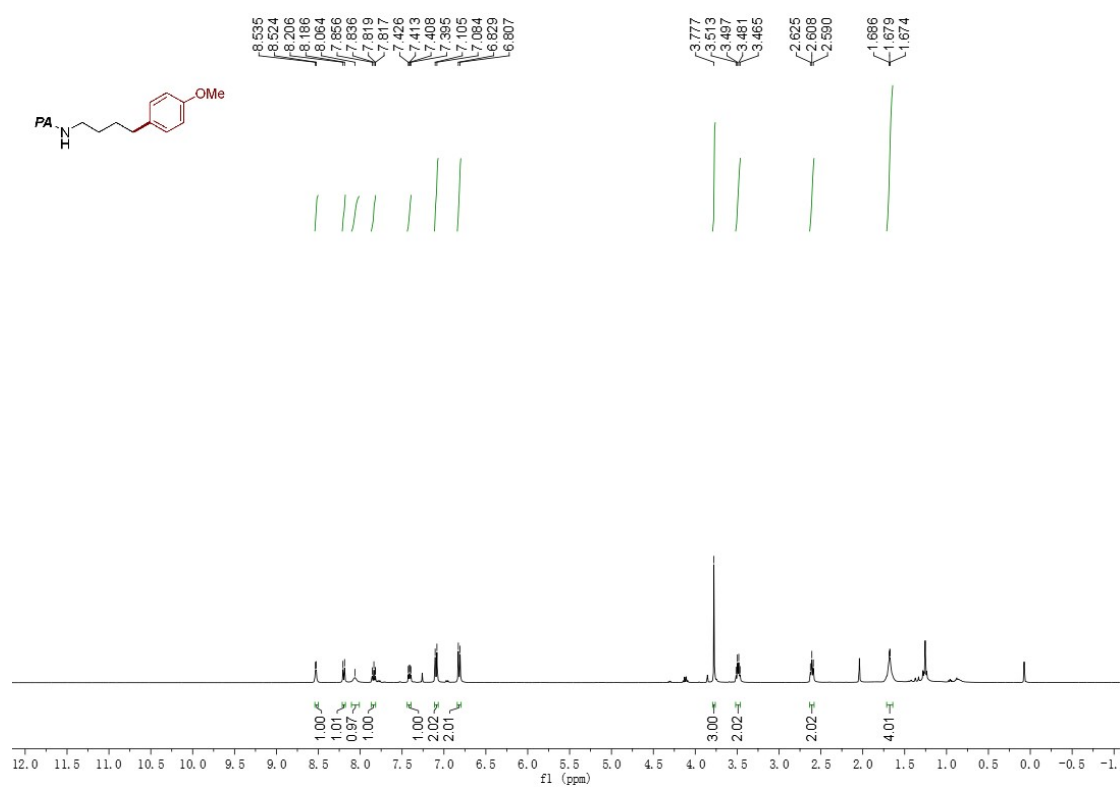

$^{13}\text{C}$  NMR (101 MHz,  $\text{CDCl}_3$ ) of **3h**

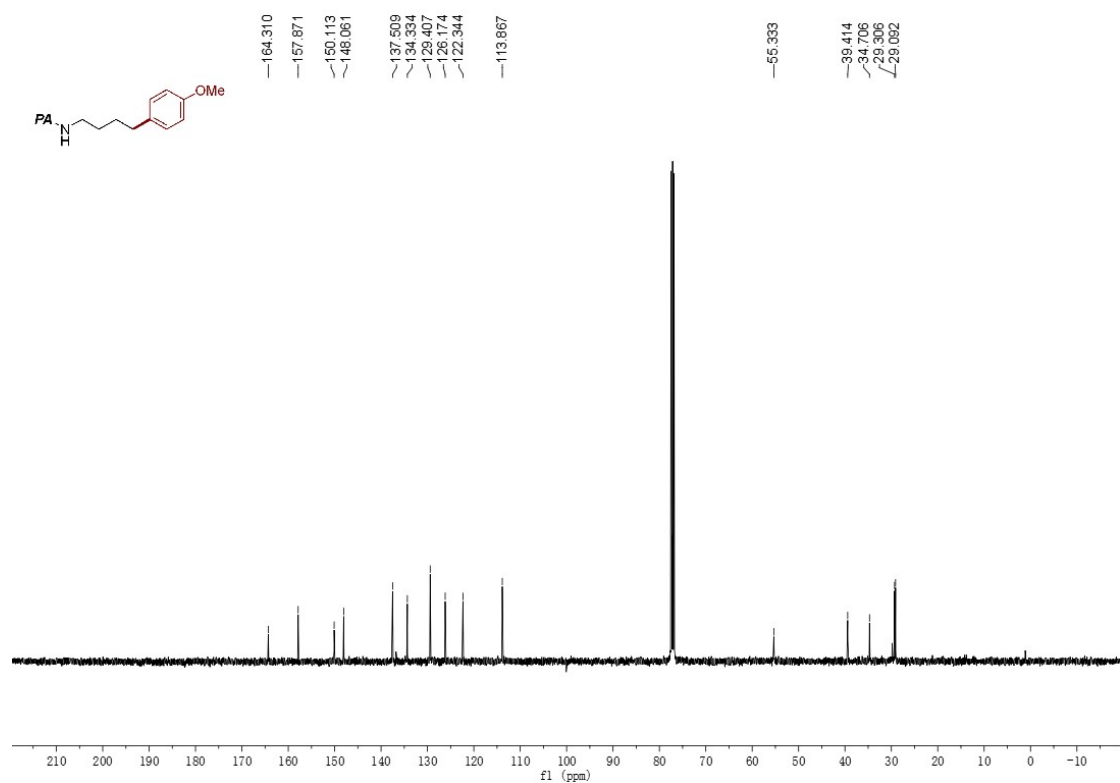

$^1\text{H}$  NMR (400 MHz,  $\text{CDCl}_3$ ) of **3i**

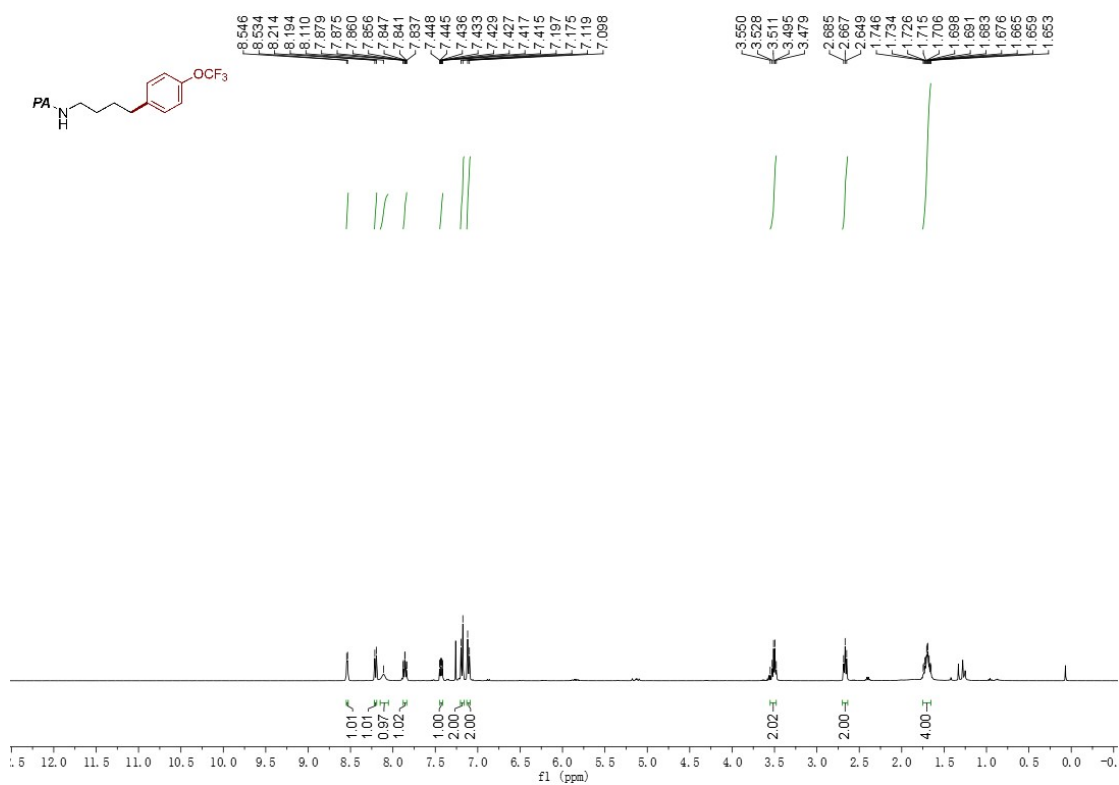

$^{13}\text{C}$  NMR (101 MHz,  $\text{CDCl}_3$ ) of **3i**

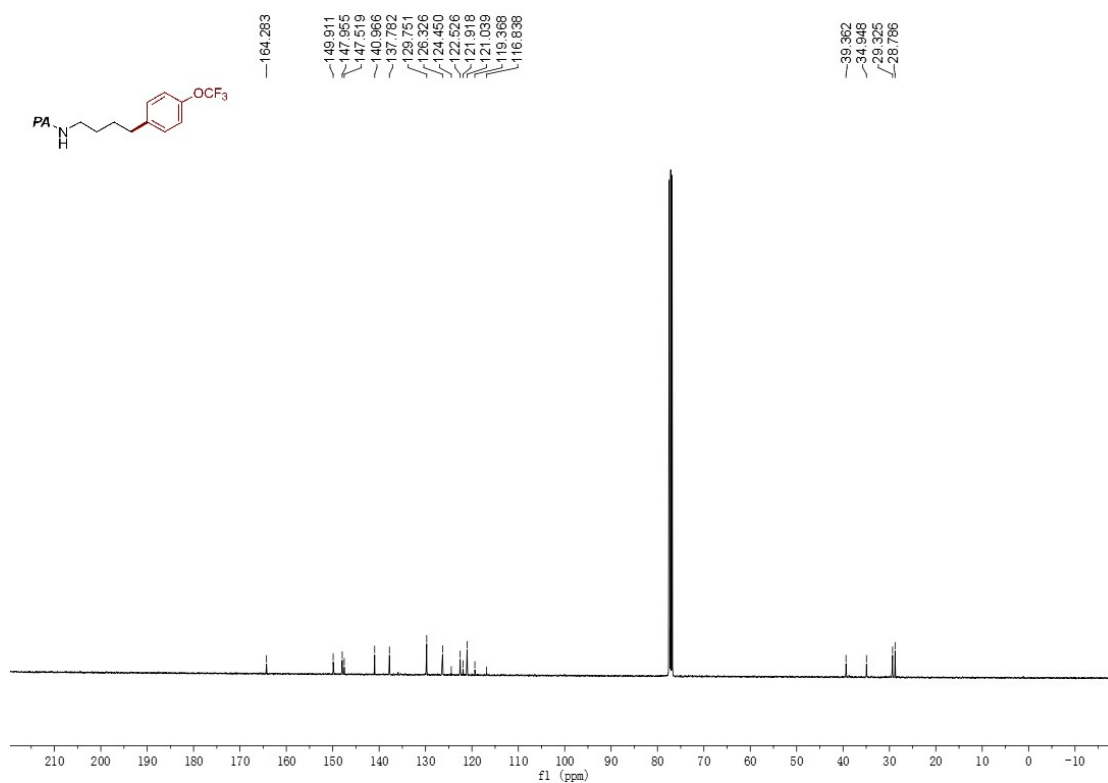

$^1\text{H}$  NMR (400 MHz,  $\text{CDCl}_3$ ) of **3j**

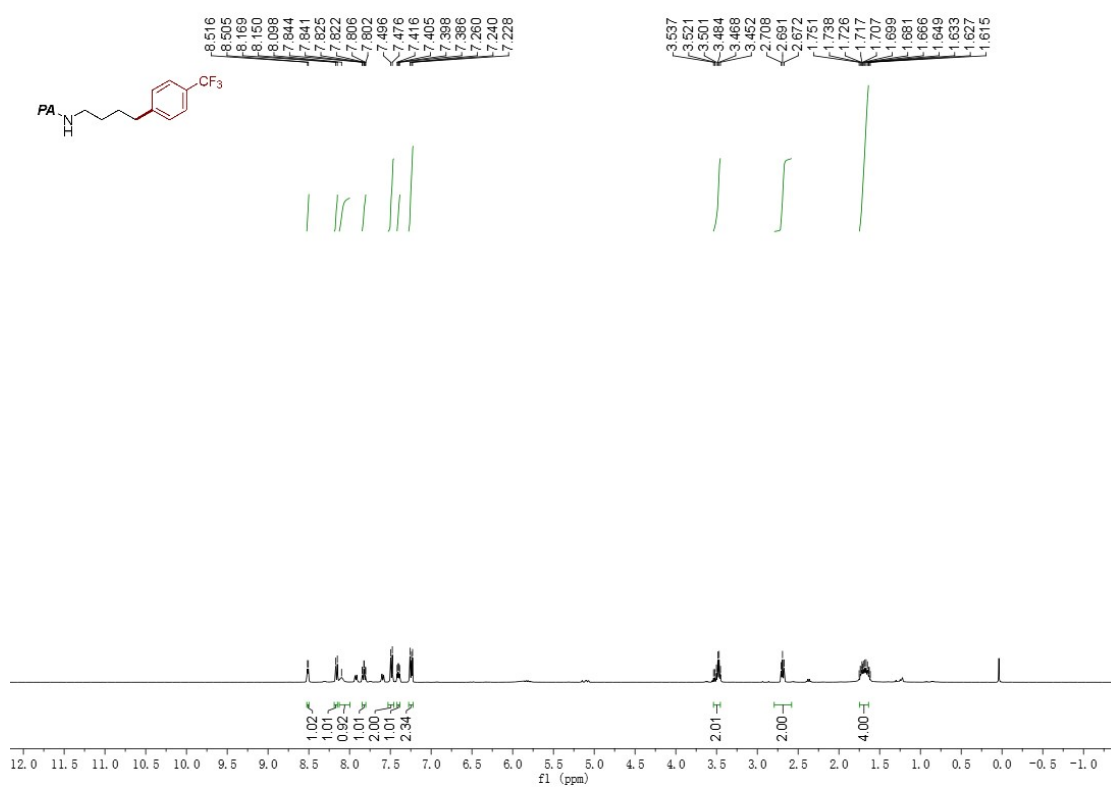

$^{13}\text{C}$  NMR (101 MHz,  $\text{CDCl}_3$ ) of **3j**

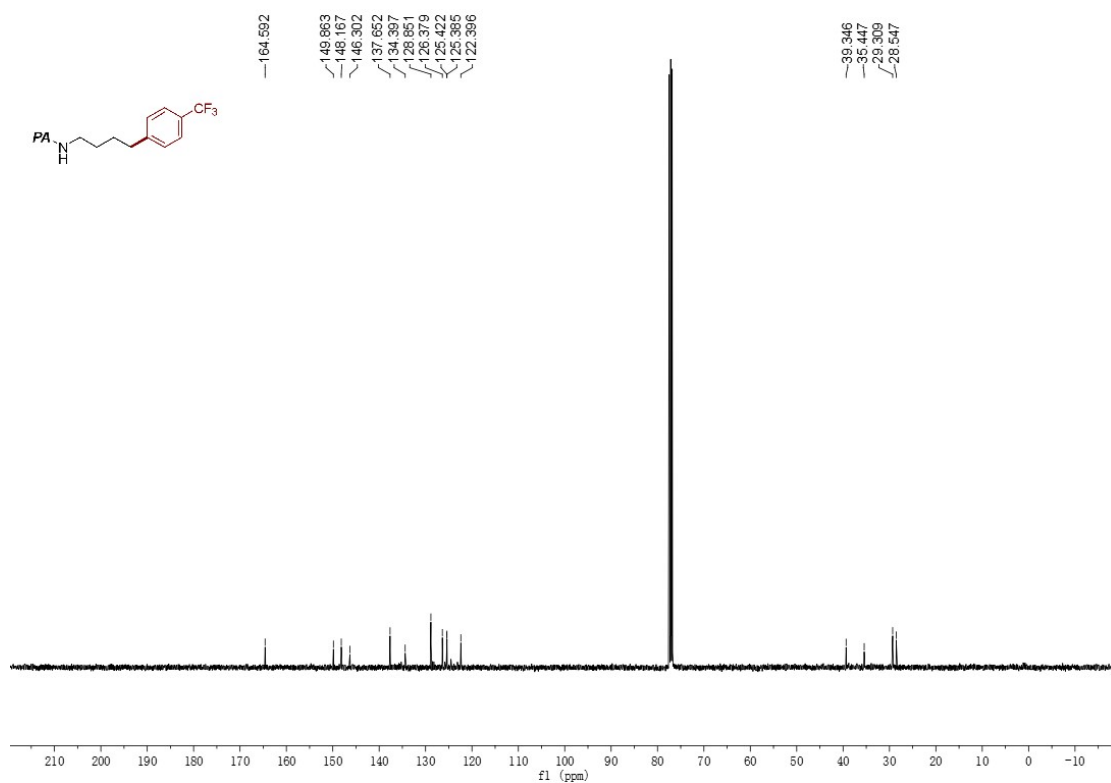

$^1\text{H}$  NMR (400 MHz,  $\text{CDCl}_3$ ) of **3k**

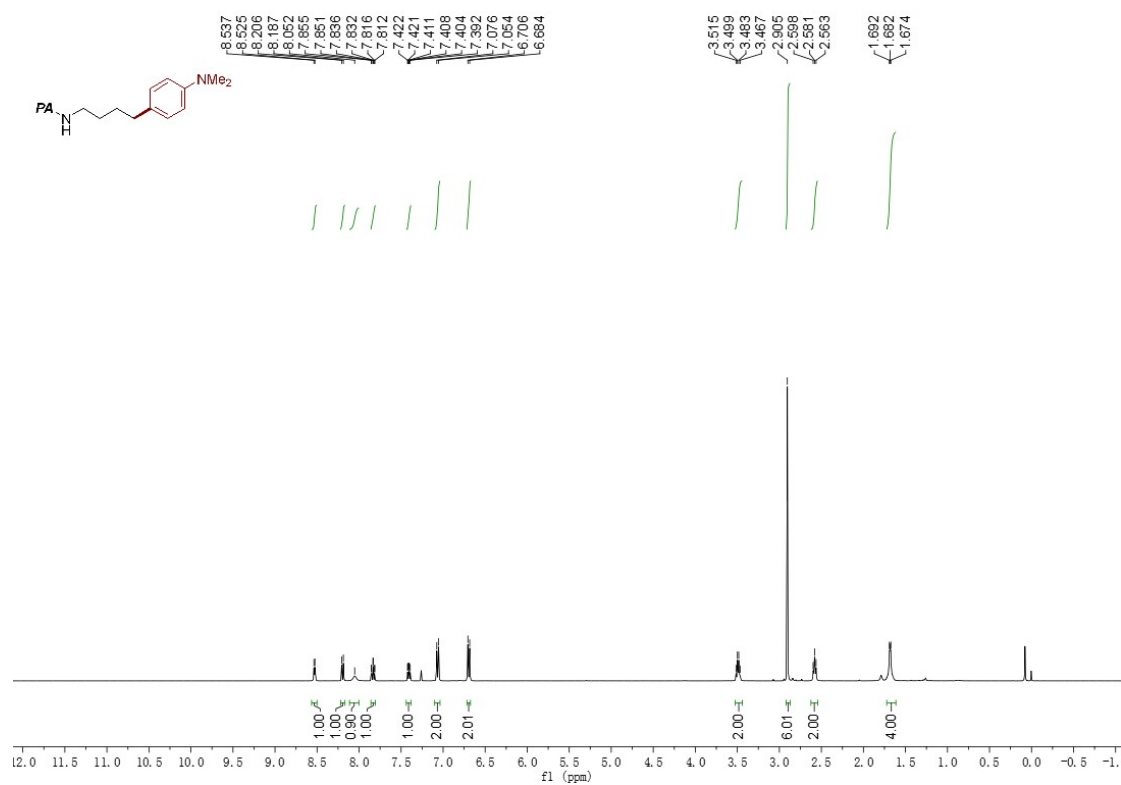

$^{13}\text{C}$  NMR (101 MHz,  $\text{CDCl}_3$ ) of **3k**

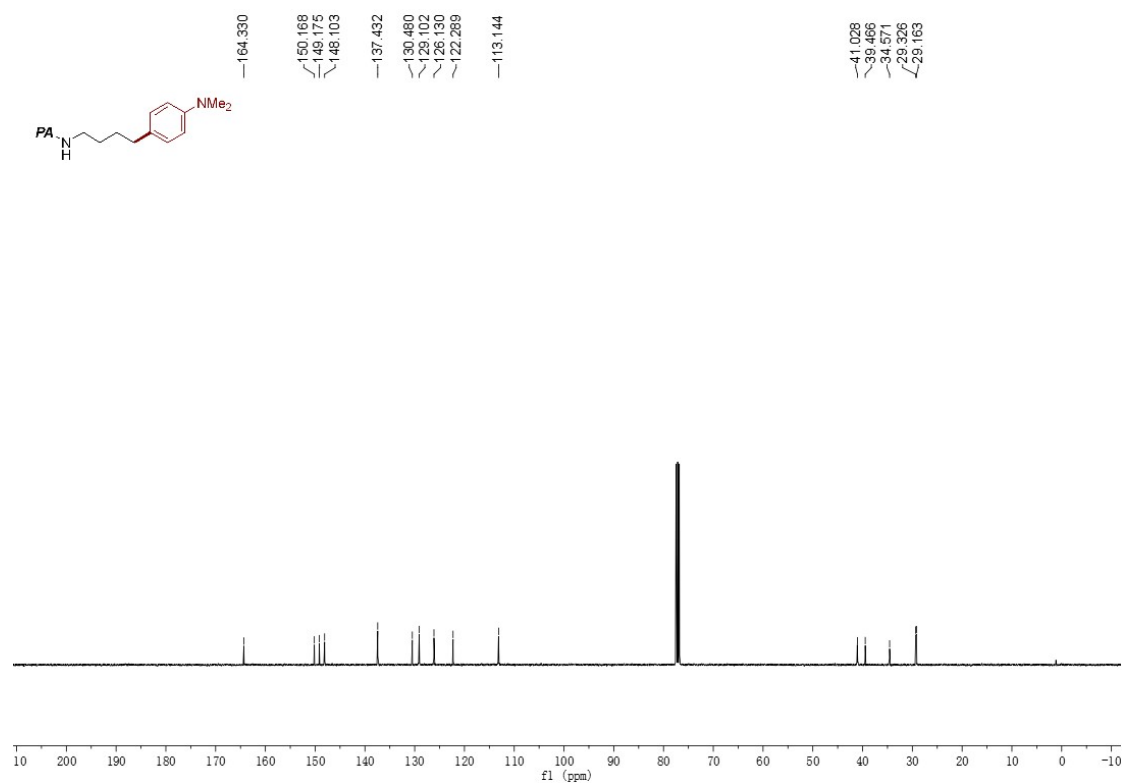

$^1\text{H}$  NMR (400 MHz,  $\text{CDCl}_3$ ) of **31**

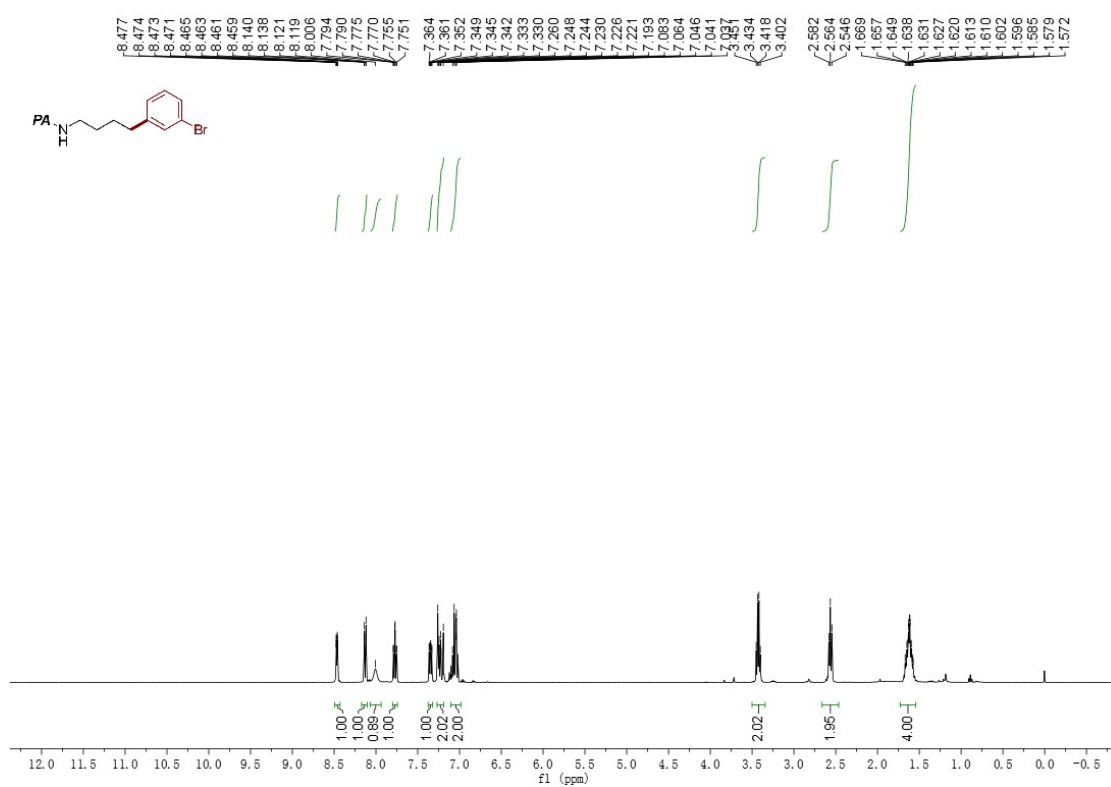

$^{13}\text{C}$  NMR (101 MHz,  $\text{CDCl}_3$ ) of **31**

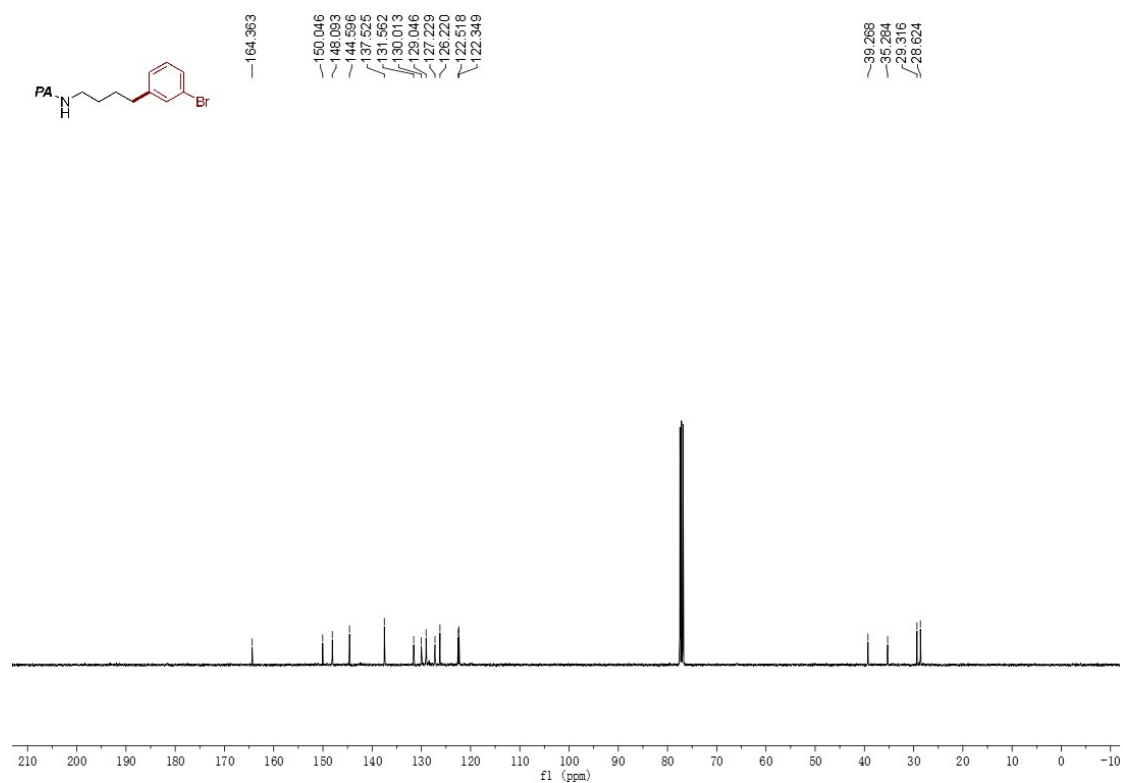

<sup>1</sup>H NMR (400 MHz, CDCl<sub>3</sub>) of **3m**

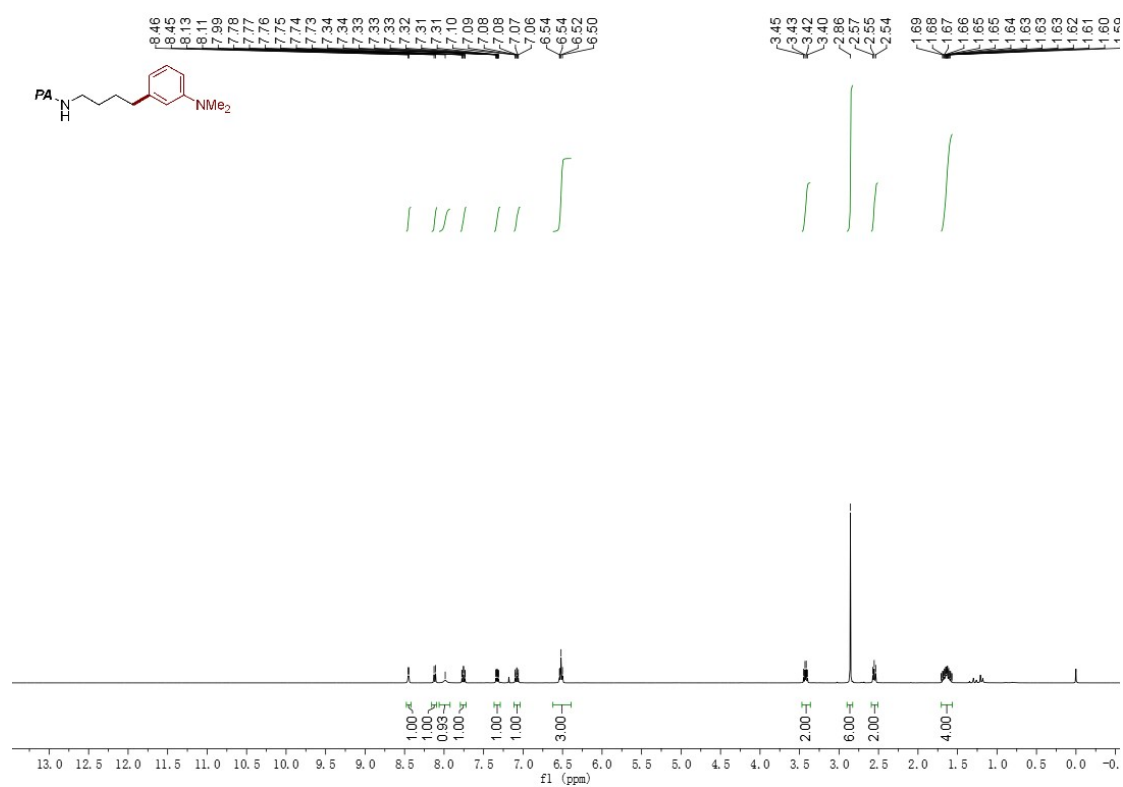

<sup>13</sup>C NMR (101 MHz, CDCl<sub>3</sub>) of **3m**

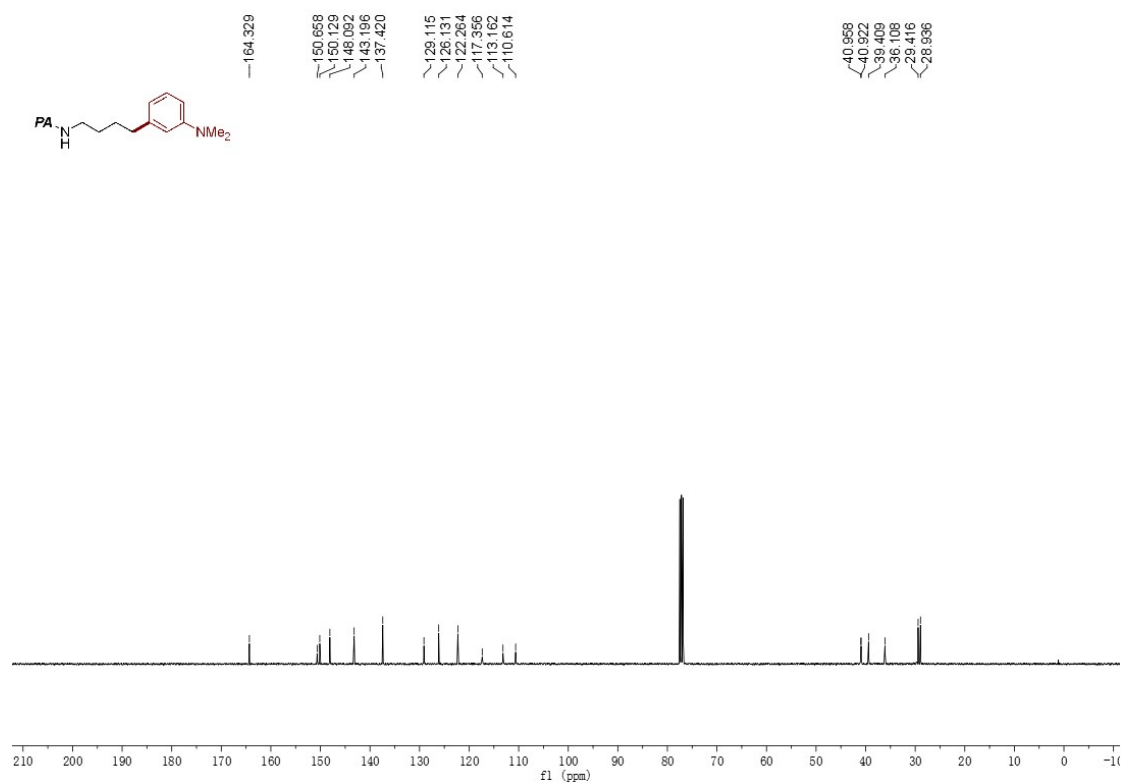

$^1\text{H}$  NMR (400 MHz,  $\text{CDCl}_3$ ) of **3n**

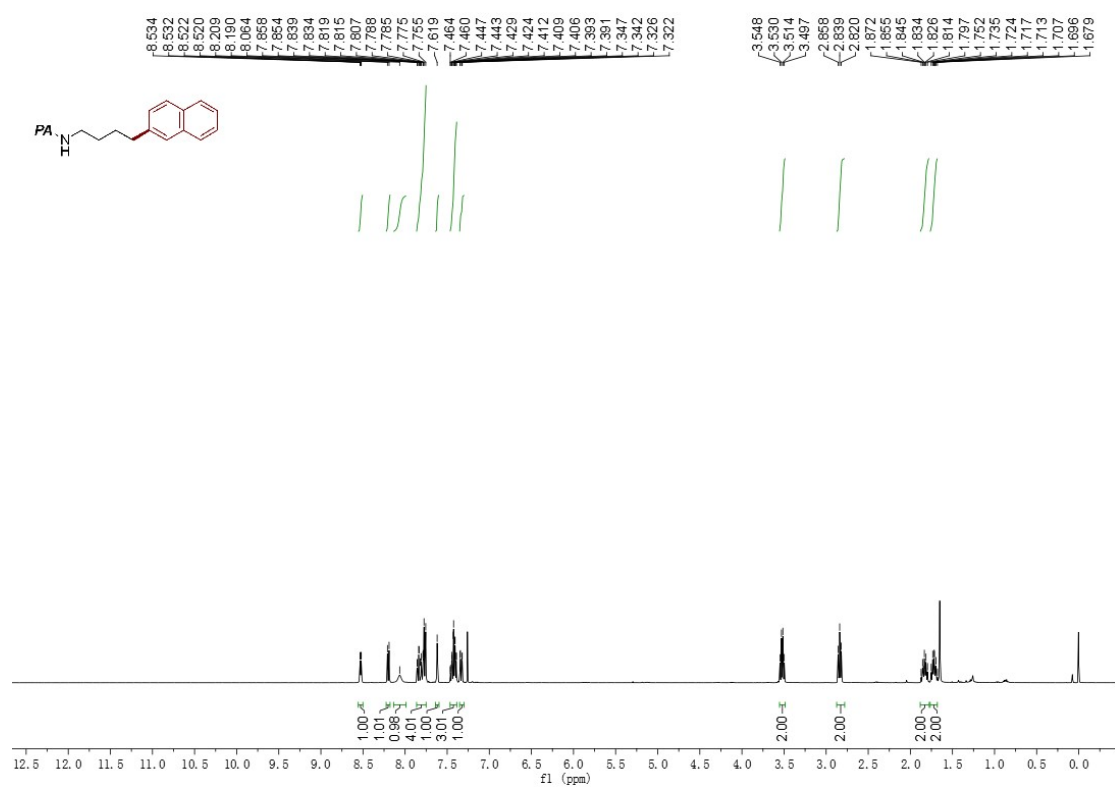

$^{13}\text{C}$  NMR (101 MHz,  $\text{CDCl}_3$ ) of **3n**

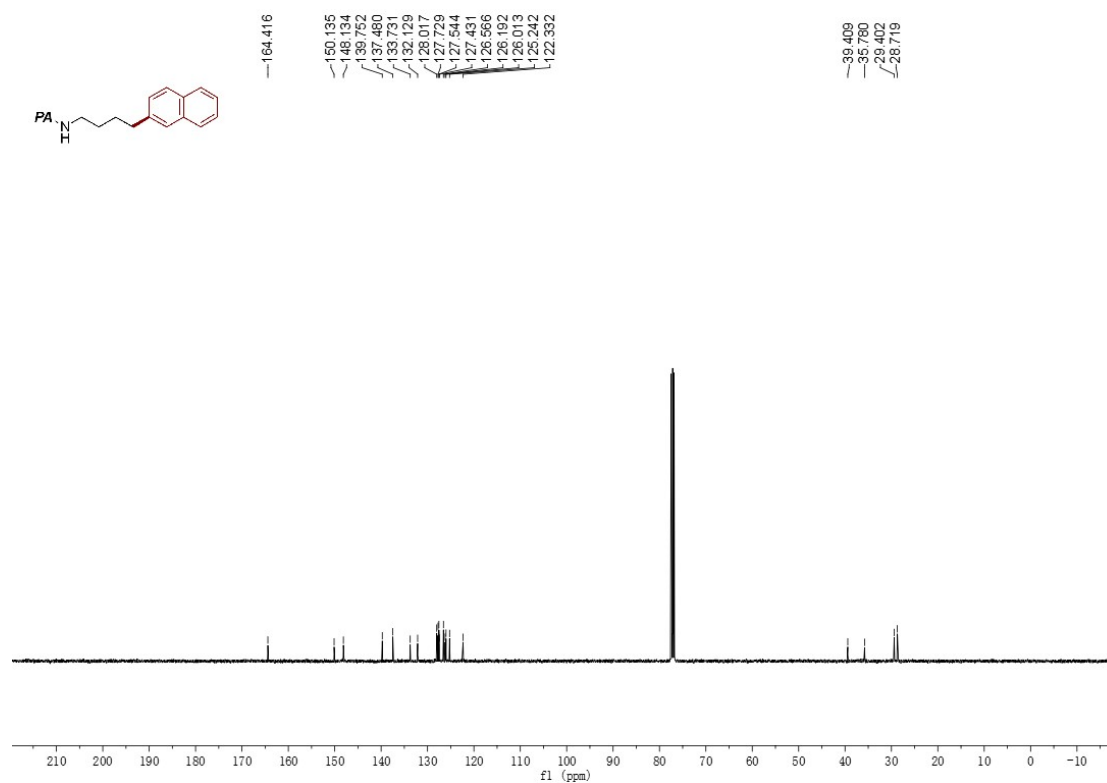



$^1\text{H}$  NMR (400 MHz,  $\text{CDCl}_3$ ) of **3o**

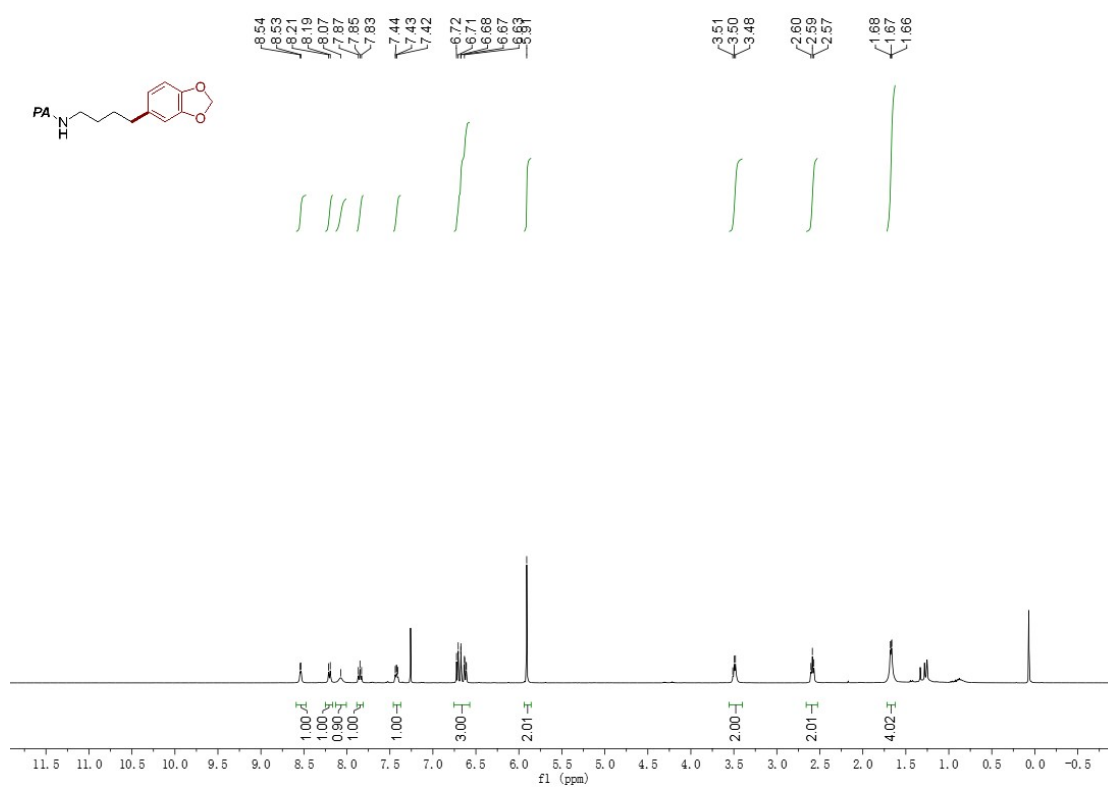

$^{13}\text{C}$  NMR (101 MHz,  $\text{CDCl}_3$ ) of **3o**

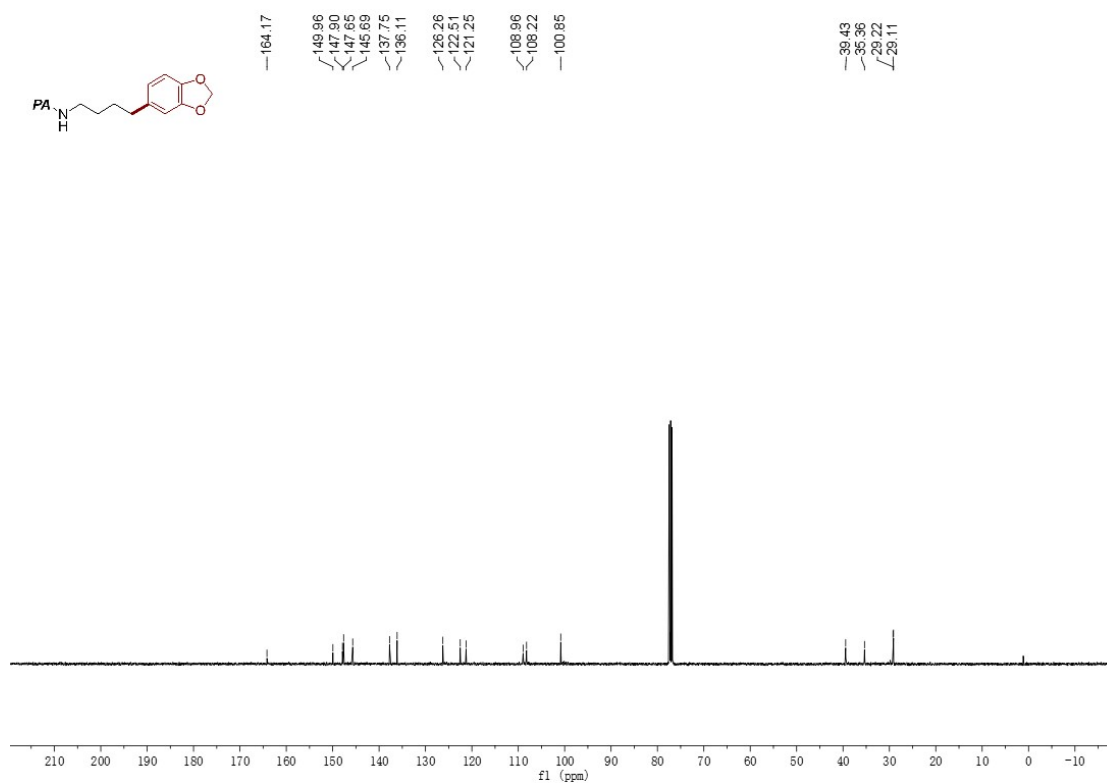

$^1\text{H}$  NMR (400 MHz,  $\text{CDCl}_3$ ) of **3p**

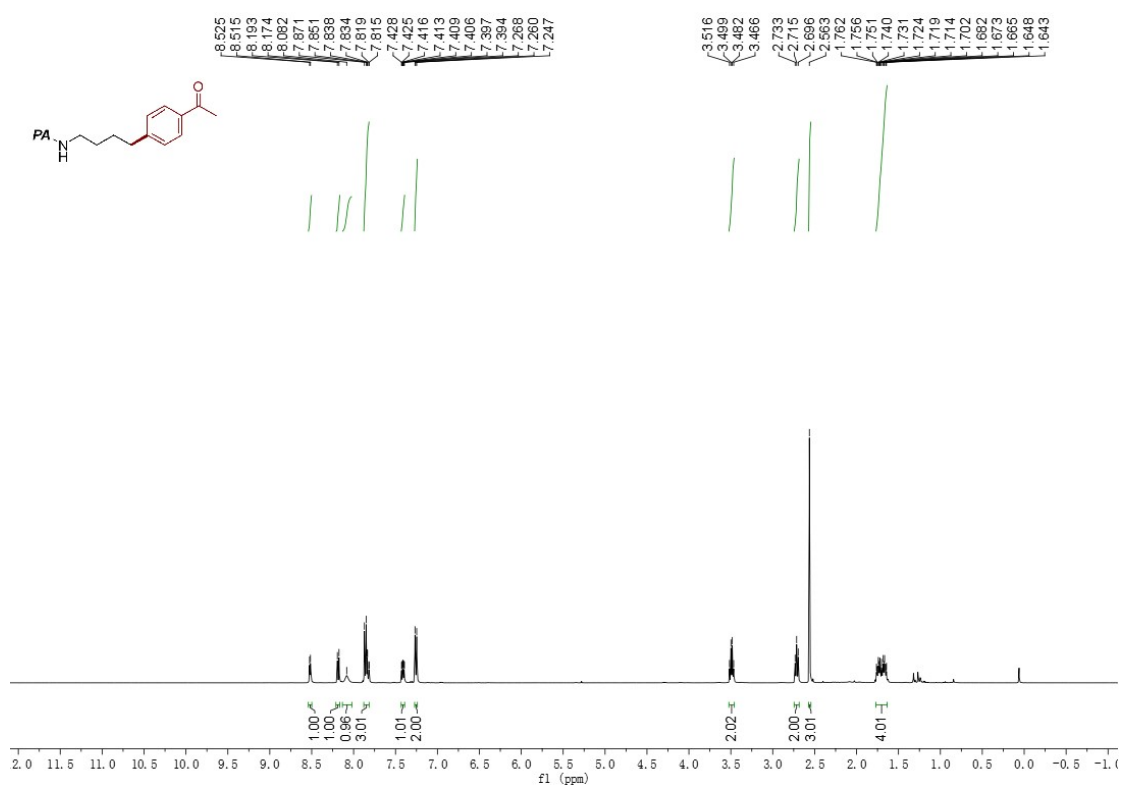

$^{13}\text{C}$  NMR (101 MHz,  $\text{CDCl}_3$ ) of **3p**

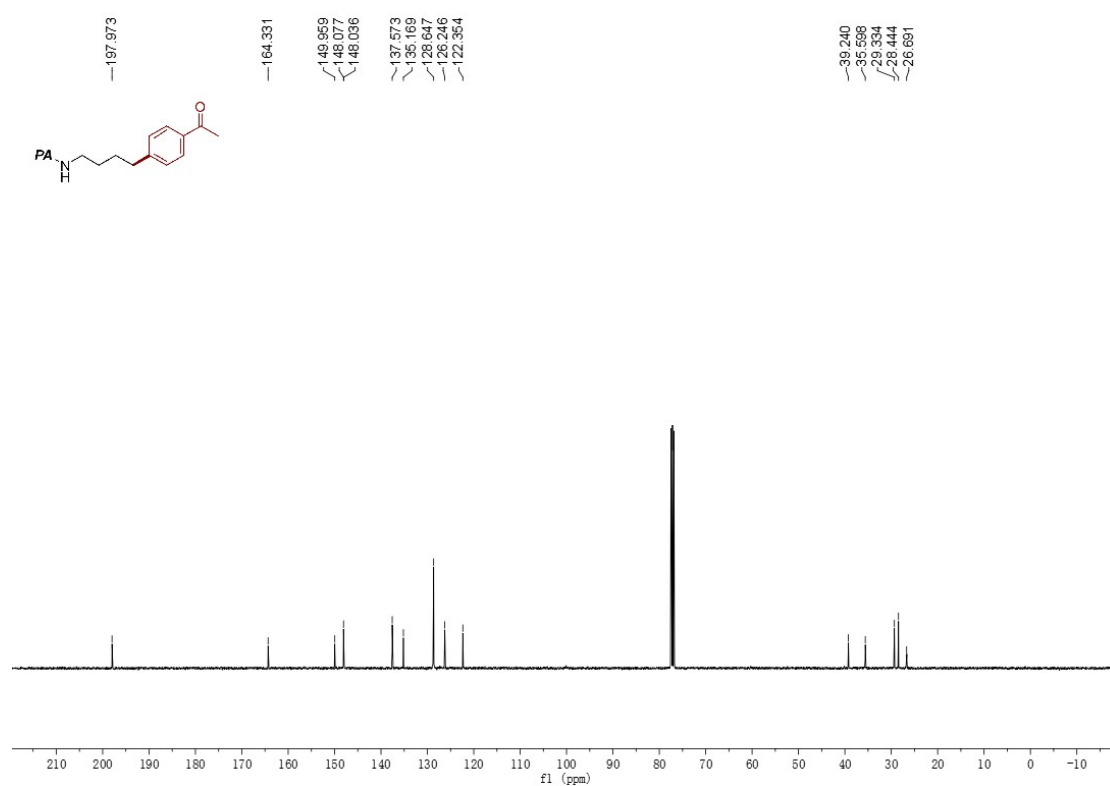

<sup>1</sup>H NMR (400 MHz, CDCl<sub>3</sub>) of **3q**

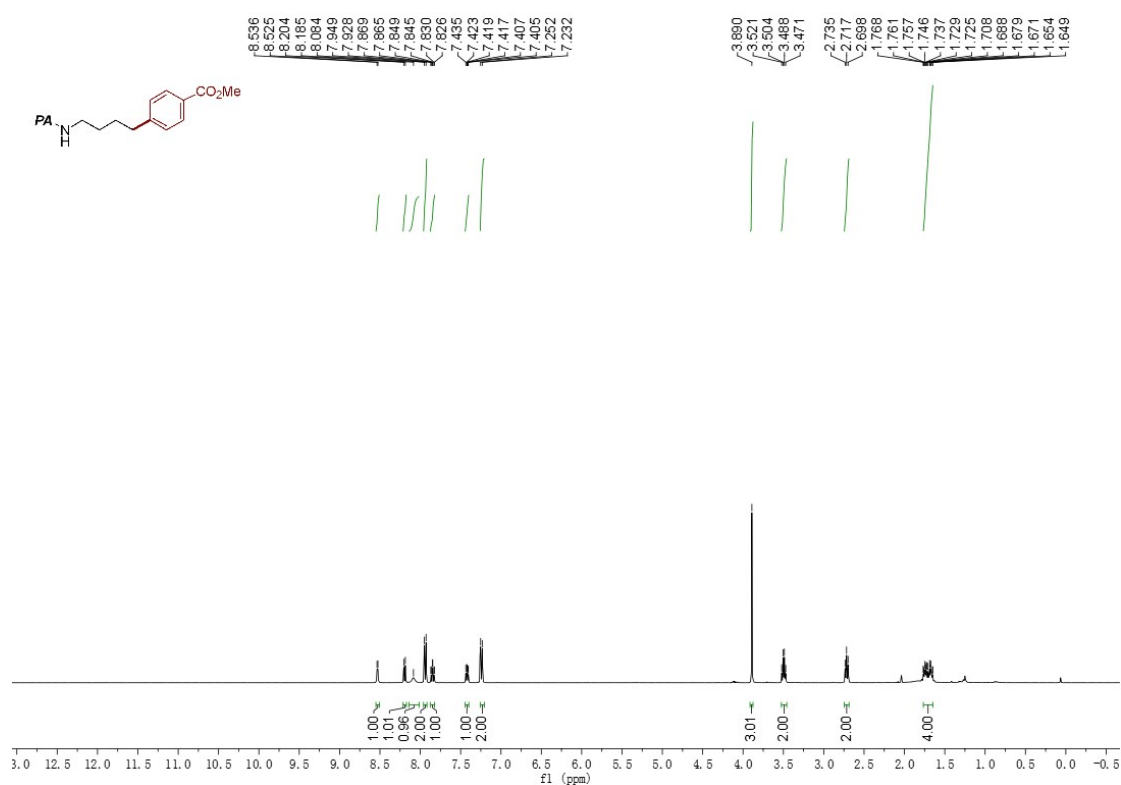

<sup>13</sup>C NMR (101 MHz, CDCl<sub>3</sub>) of **3q**

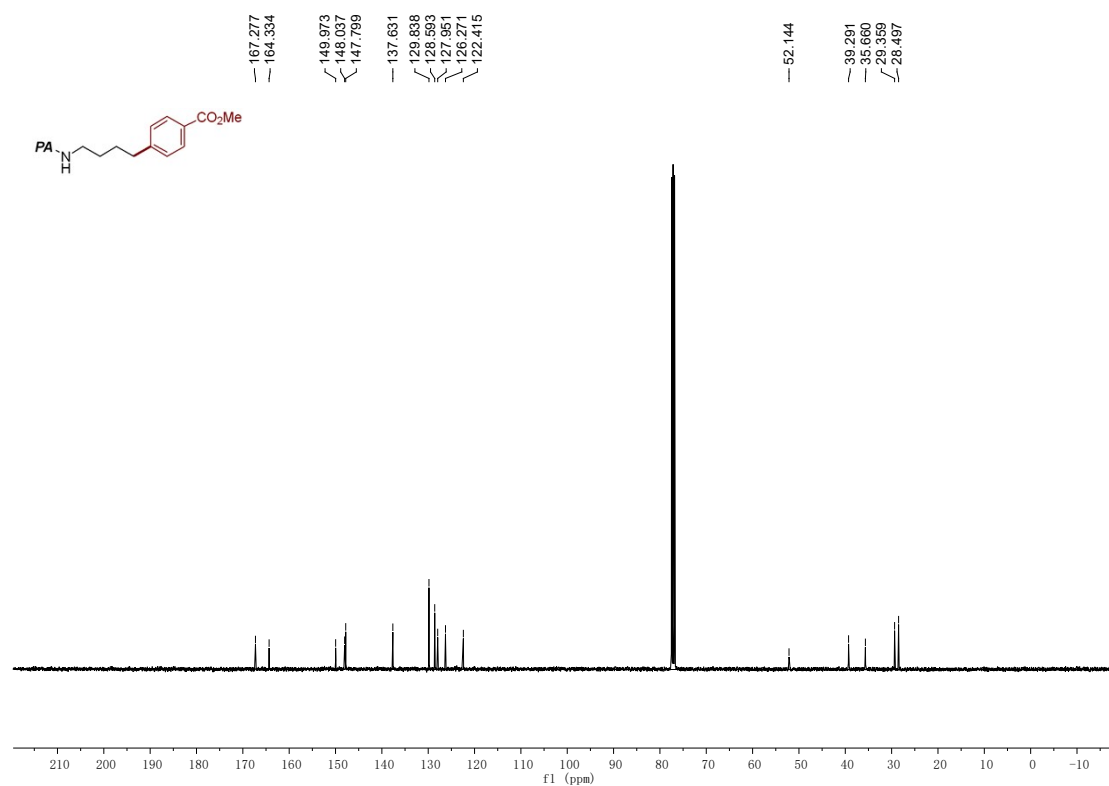

<sup>1</sup>H NMR (400 MHz, CDCl<sub>3</sub>) of **3r**

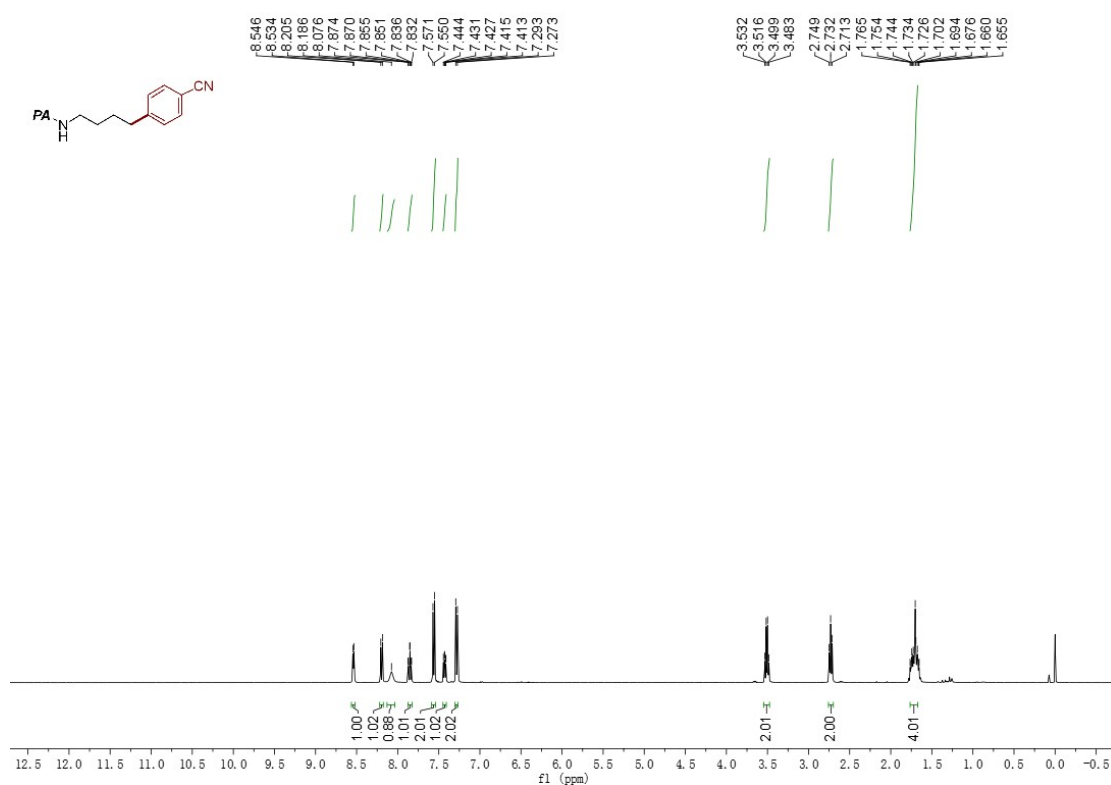

<sup>13</sup>C NMR (101 MHz, CDCl<sub>3</sub>) of **3r**

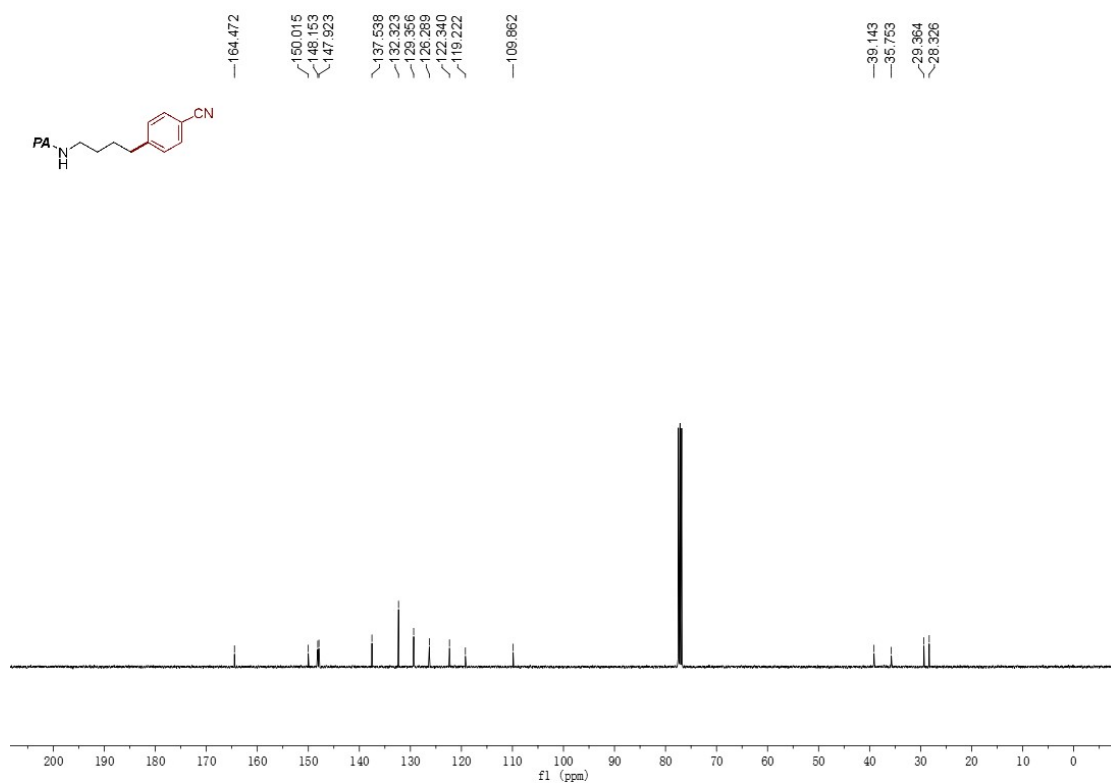

<sup>1</sup>H NMR (400 MHz, CDCl<sub>3</sub>) of **3s**

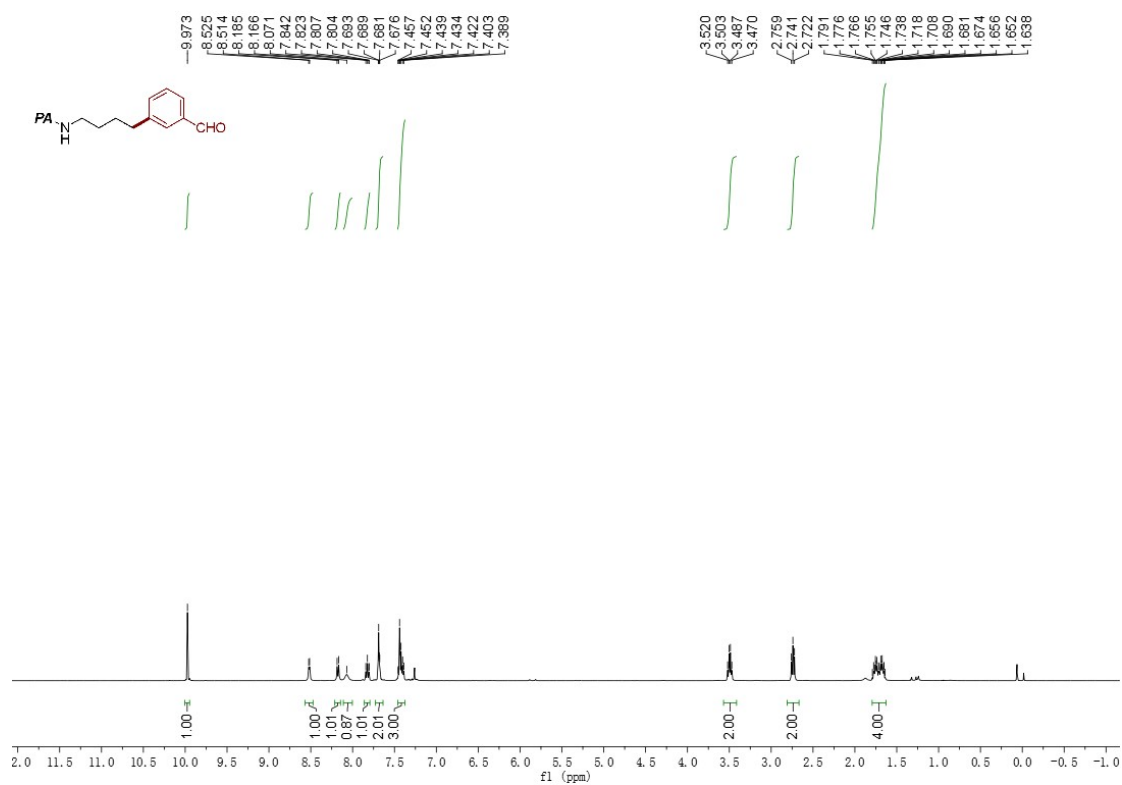

<sup>13</sup>C NMR (101 MHz, CDCl<sub>3</sub>) of **3s**

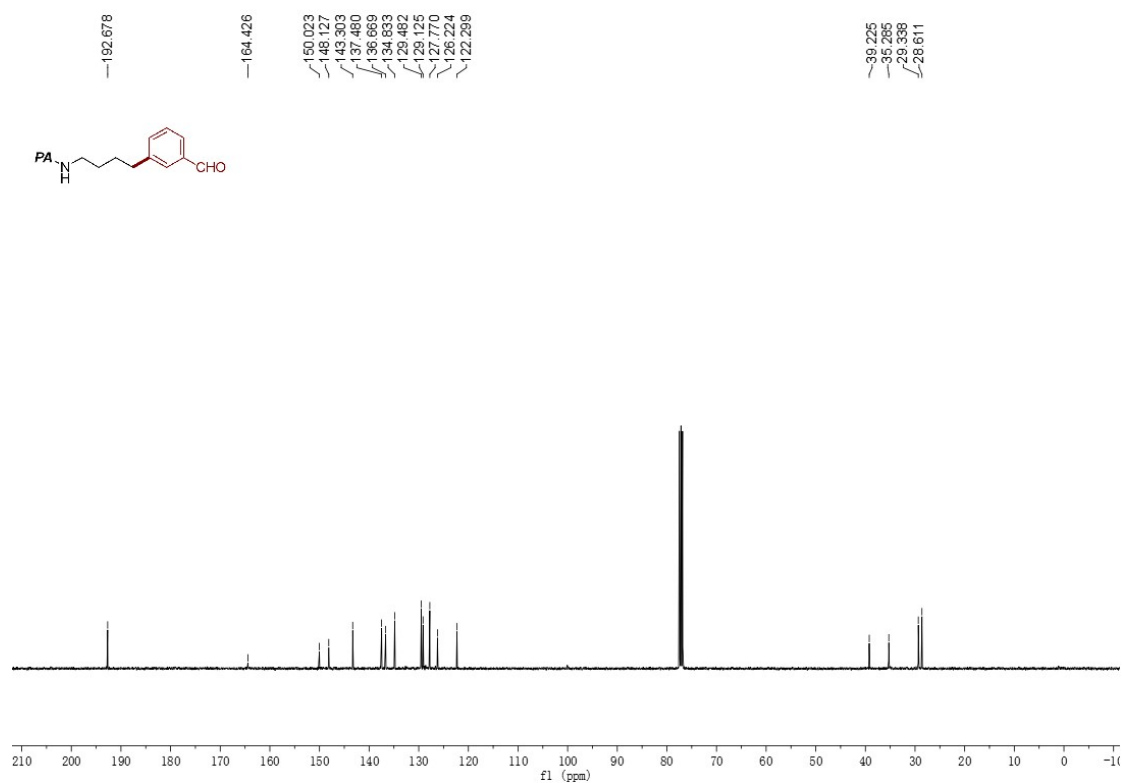

$^1\text{H}$  NMR (400 MHz,  $\text{CDCl}_3$ ) of **3t**

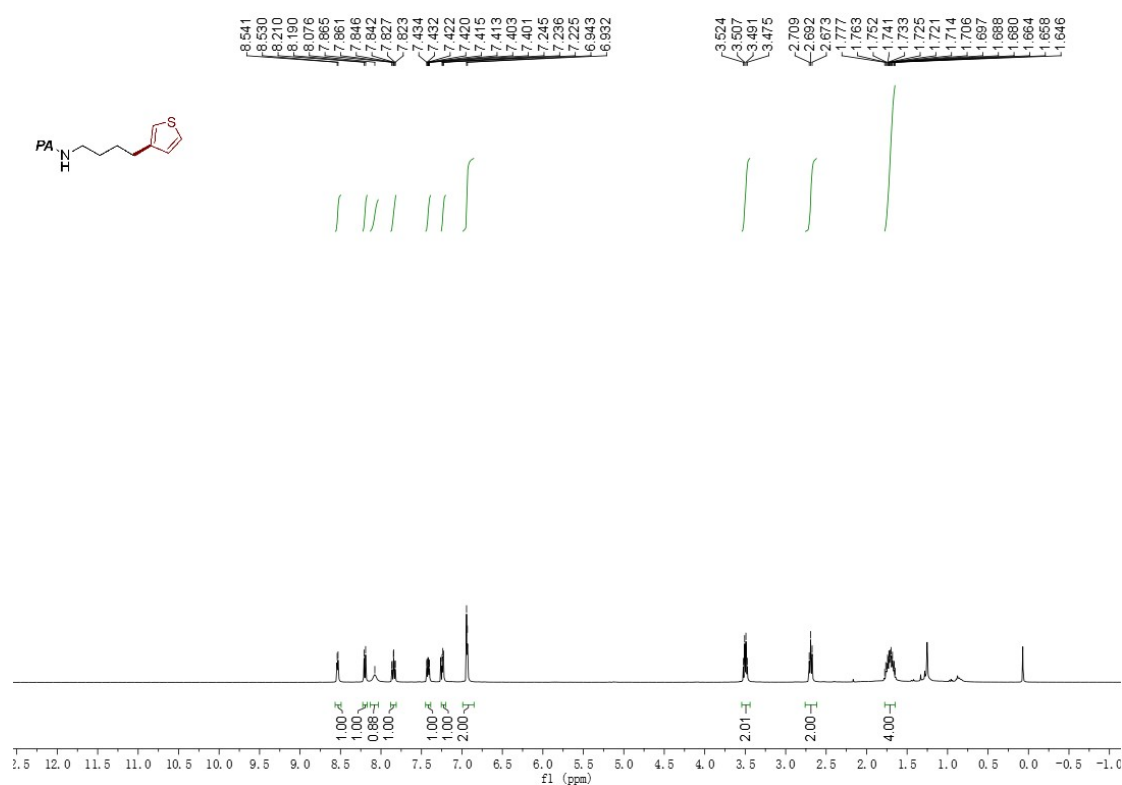

$^{13}\text{C}$  NMR (101 MHz,  $\text{CDCl}_3$ ) of **3t**

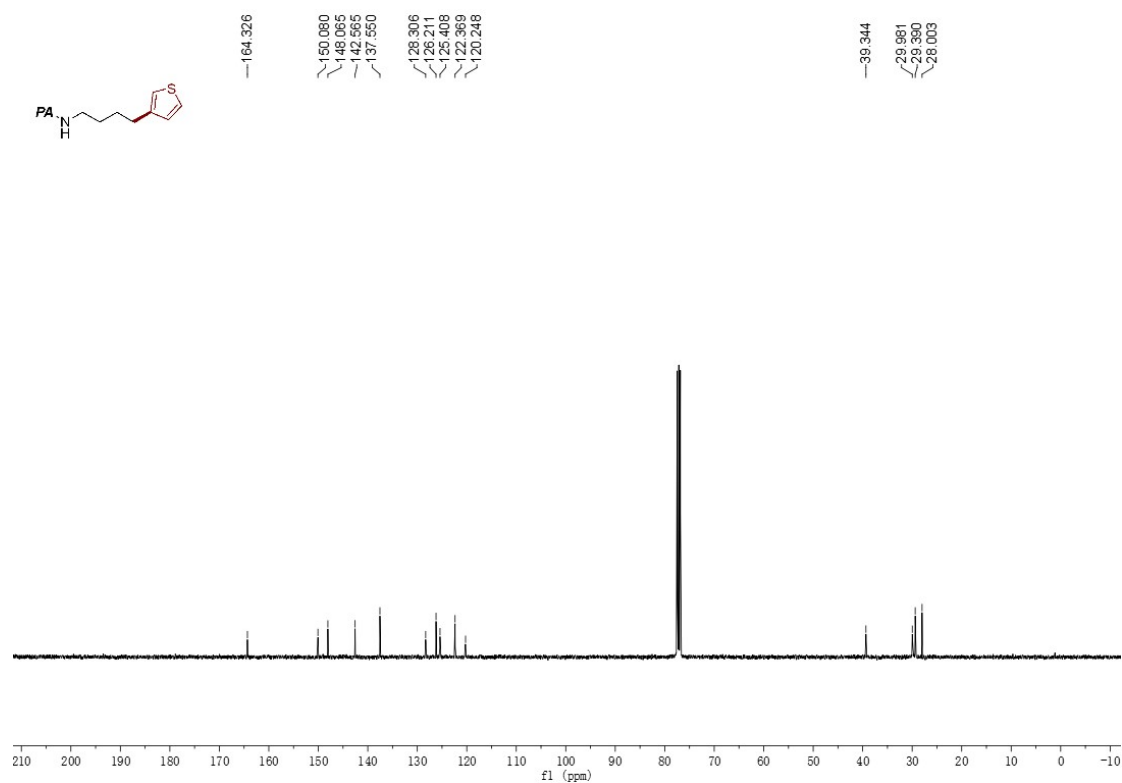

<sup>1</sup>H NMR (400 MHz, CDCl<sub>3</sub>) of **3u**

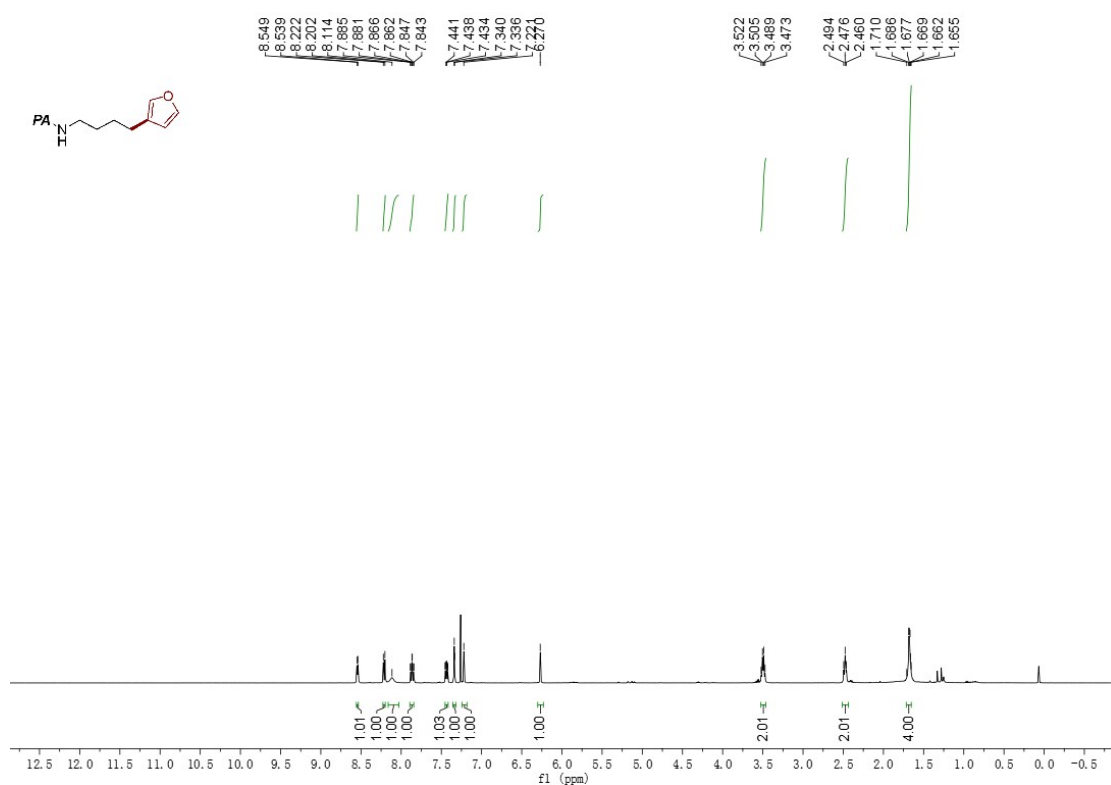

<sup>13</sup>C NMR (101 MHz, CDCl<sub>3</sub>) of **3u**

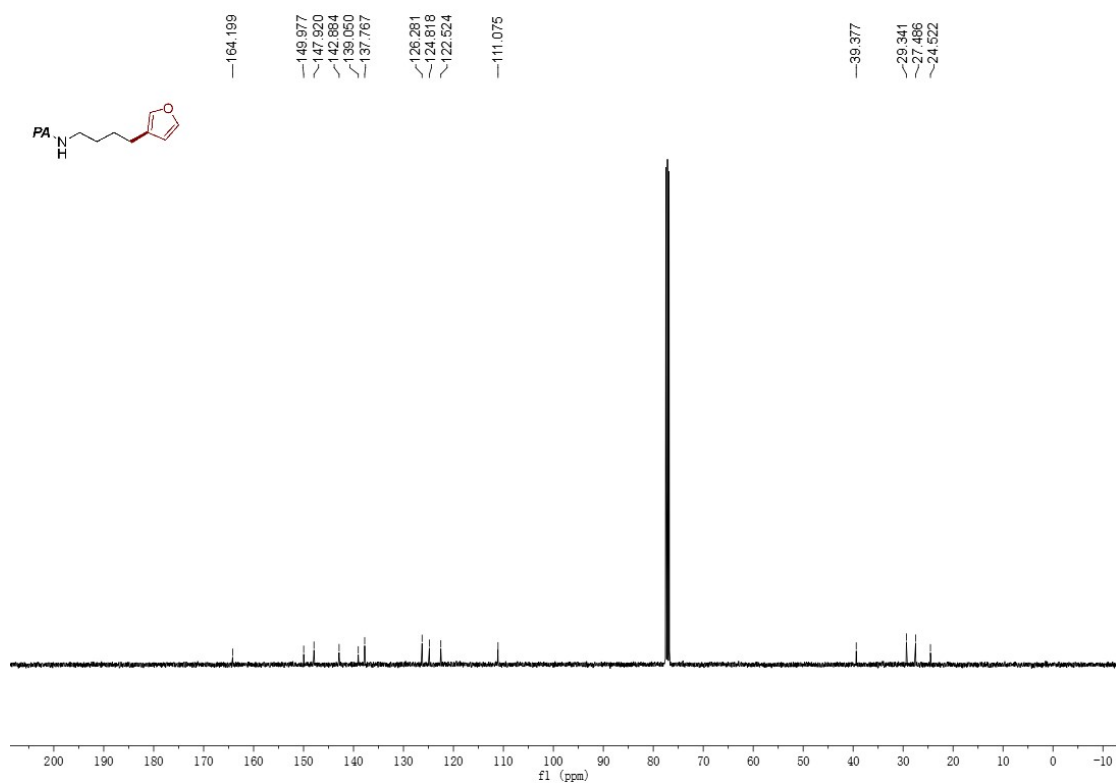

$^1\text{H}$  NMR (400 MHz,  $\text{CDCl}_3$ ) of **3v**

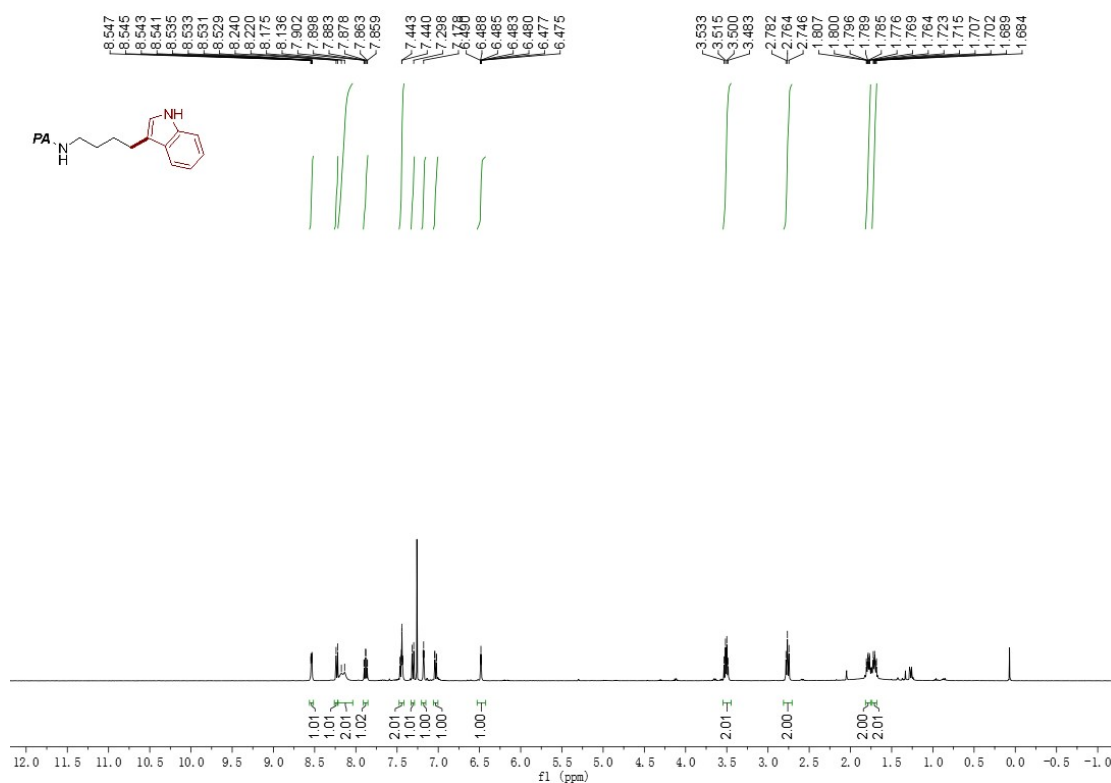

$^{13}\text{C}$  NMR (101 MHz,  $\text{CDCl}_3$ ) of **3v**

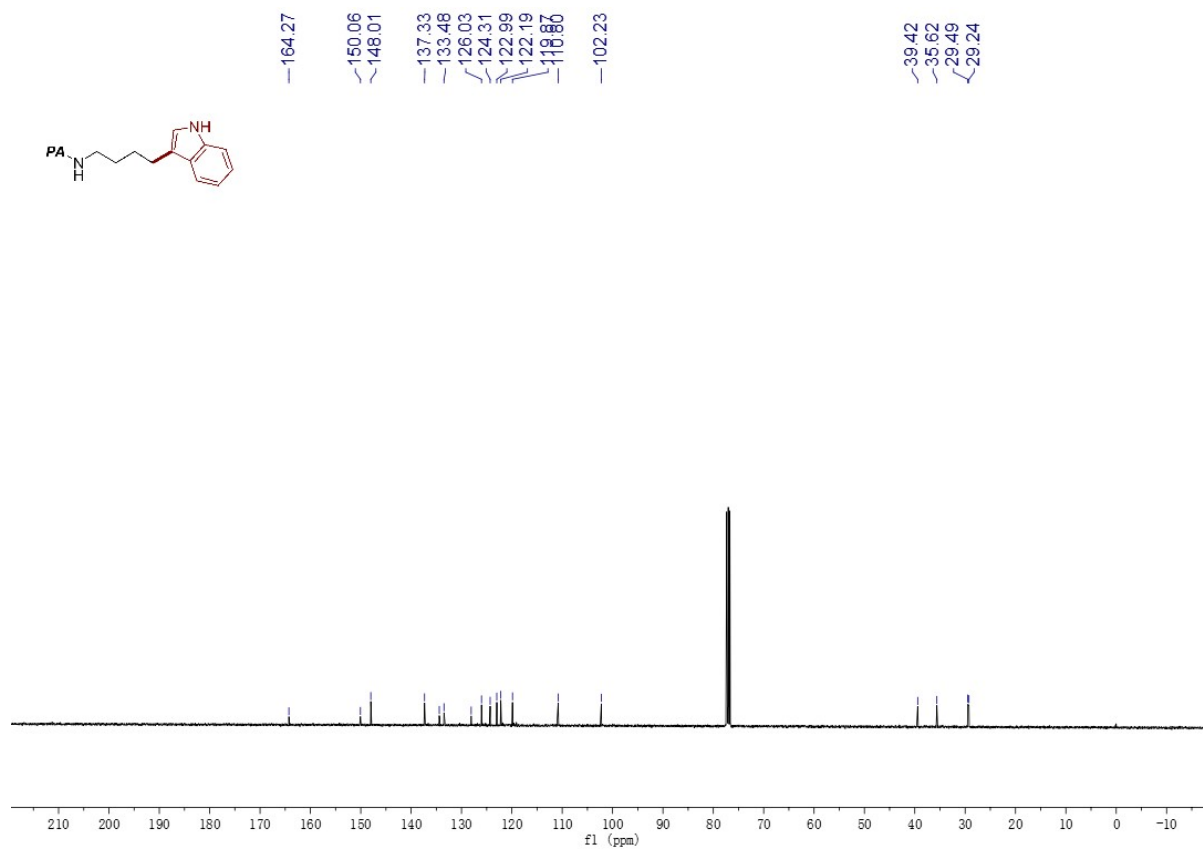



<sup>1</sup>H NMR (400 MHz, CDCl<sub>3</sub>) of **3w**

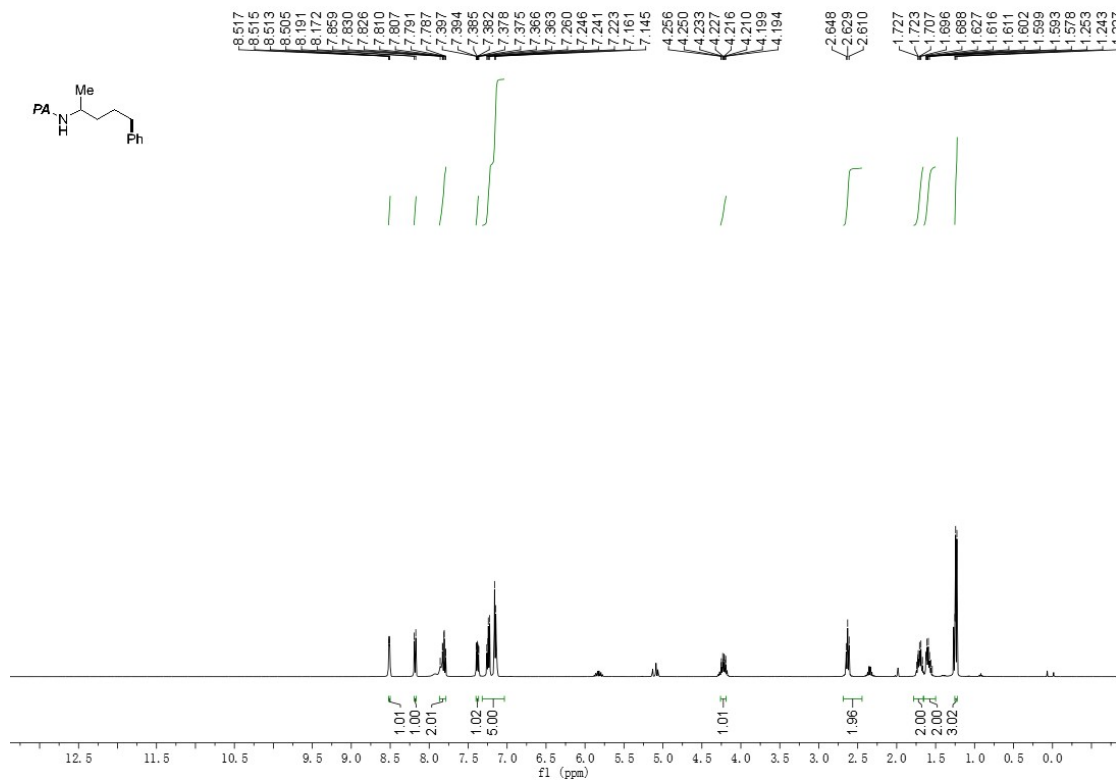

<sup>13</sup>C NMR (101 MHz, CDCl<sub>3</sub>) of **3w**

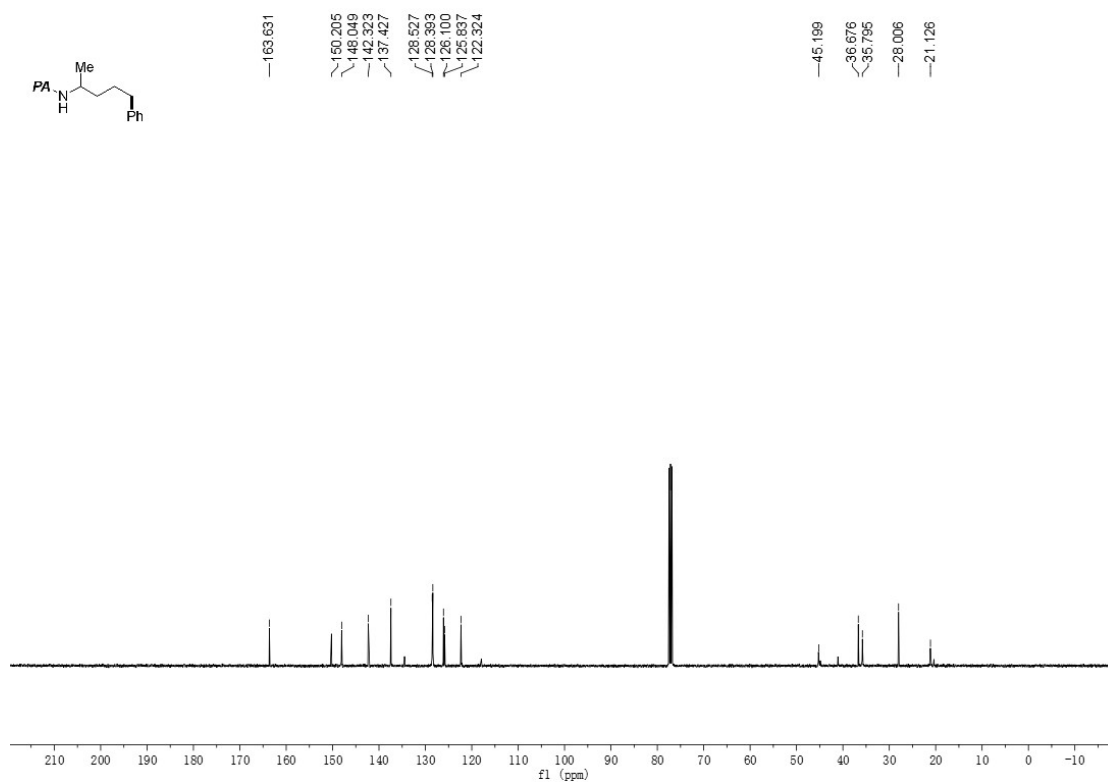

<sup>1</sup>H NMR (400 MHz, CDCl<sub>3</sub>) of **3x**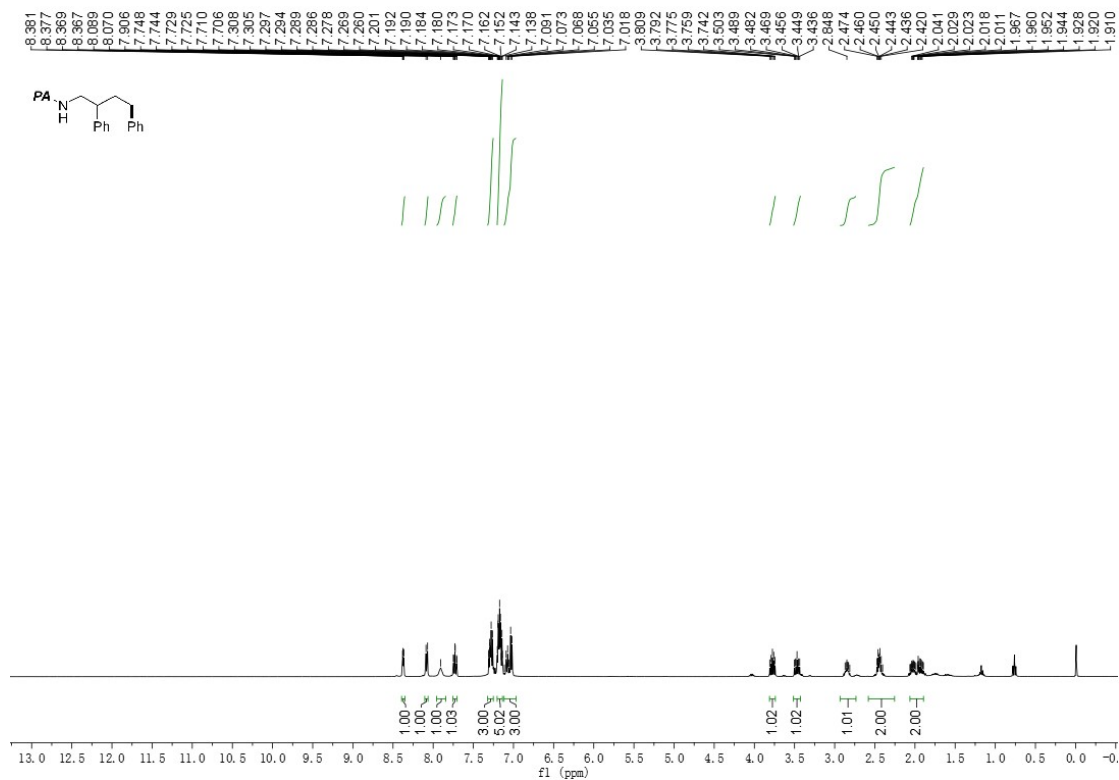 $^{13}\text{C}$  NMR (101 MHz,  $\text{CDCl}_3$ ) of **3x**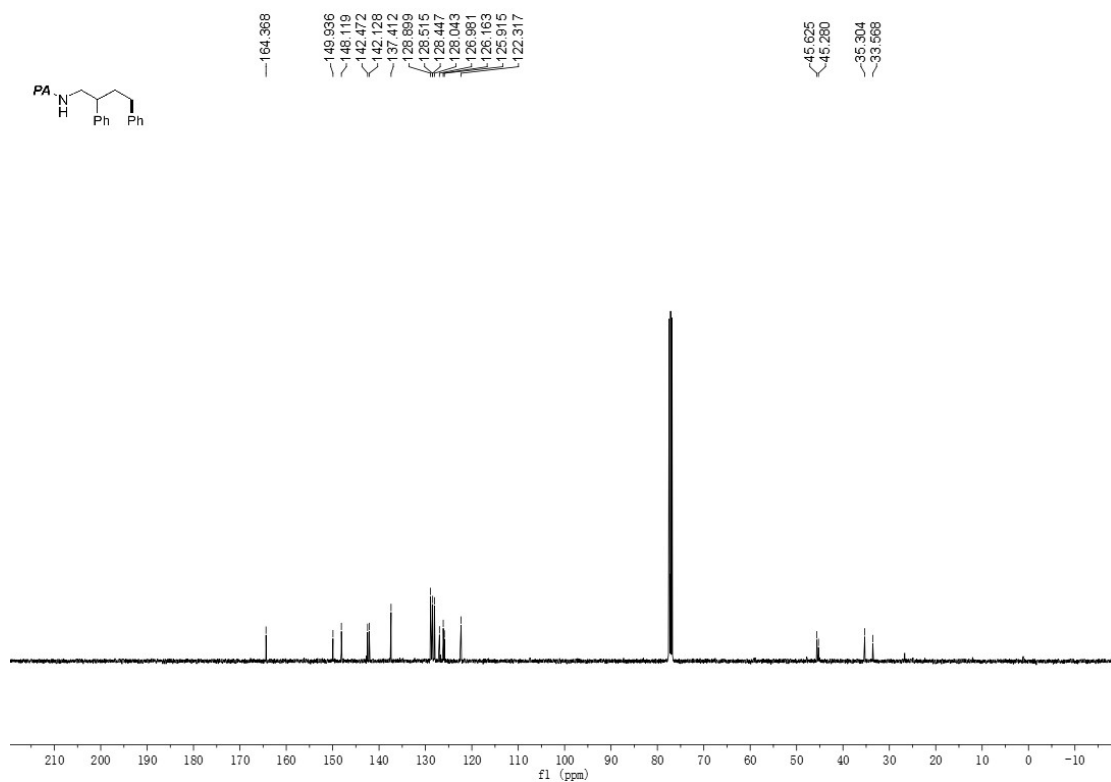

$^1\text{H}$  NMR (400 MHz,  $\text{CDCl}_3$ ) of **3y**

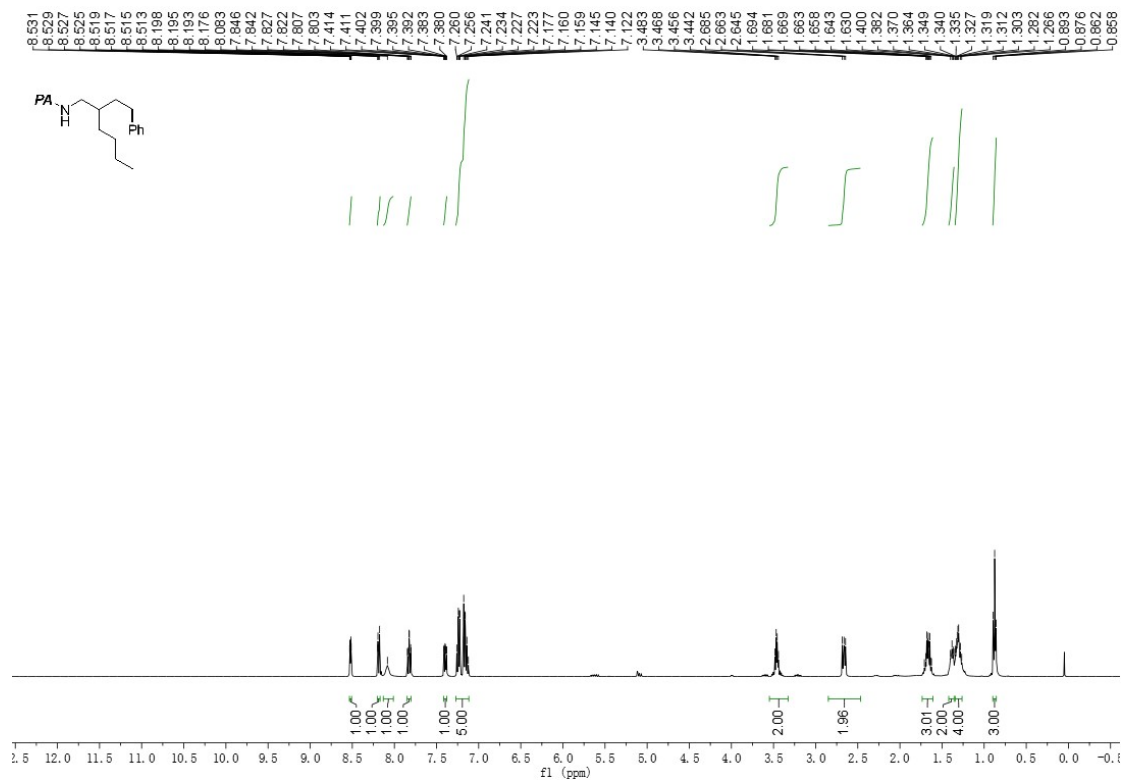

$^{13}\text{C}$  NMR (101 MHz,  $\text{CDCl}_3$ ) of **3y**

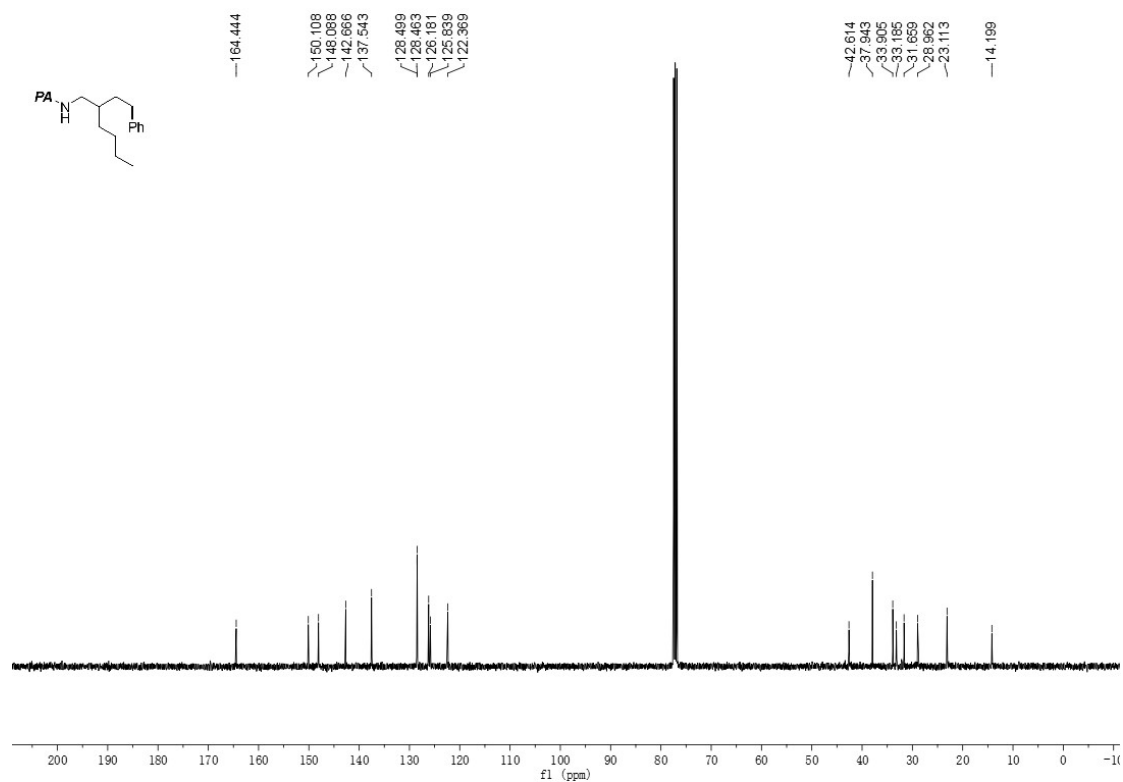

$^1\text{H}$  NMR (400 MHz,  $\text{CDCl}_3$ ) of **3z**

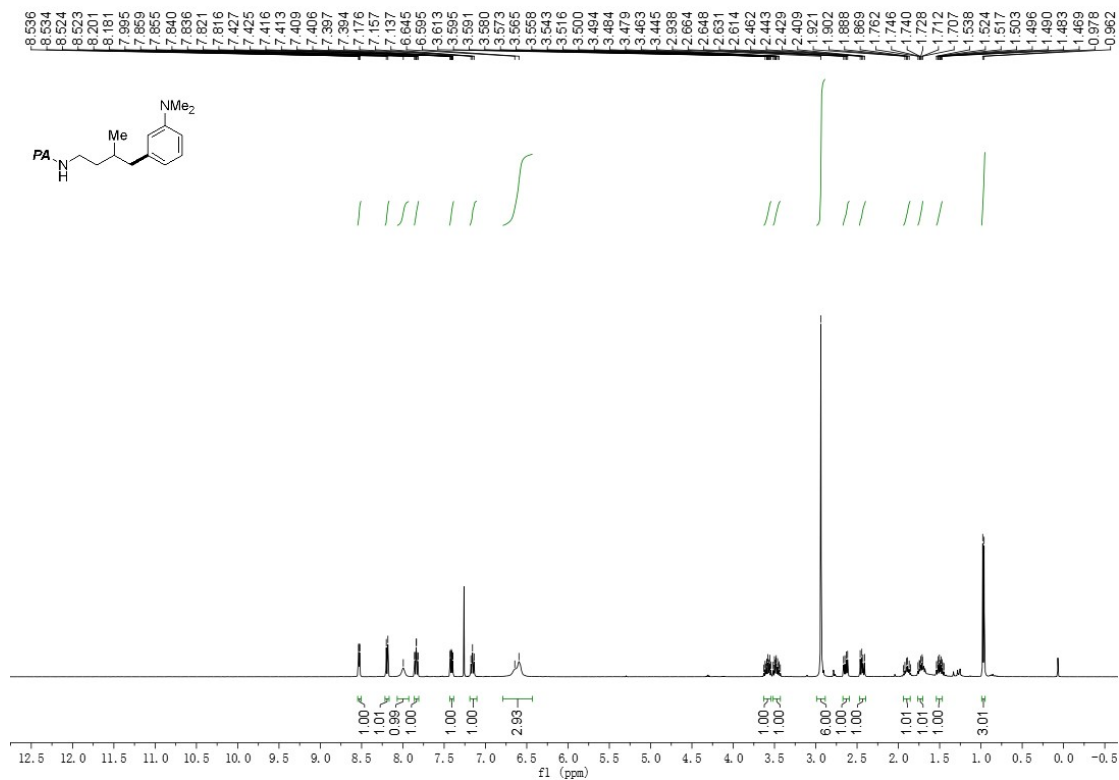

$^1\text{H}$  NMR (400 MHz,  $\text{CDCl}_3$ ) of **3aa** (from **Z**)

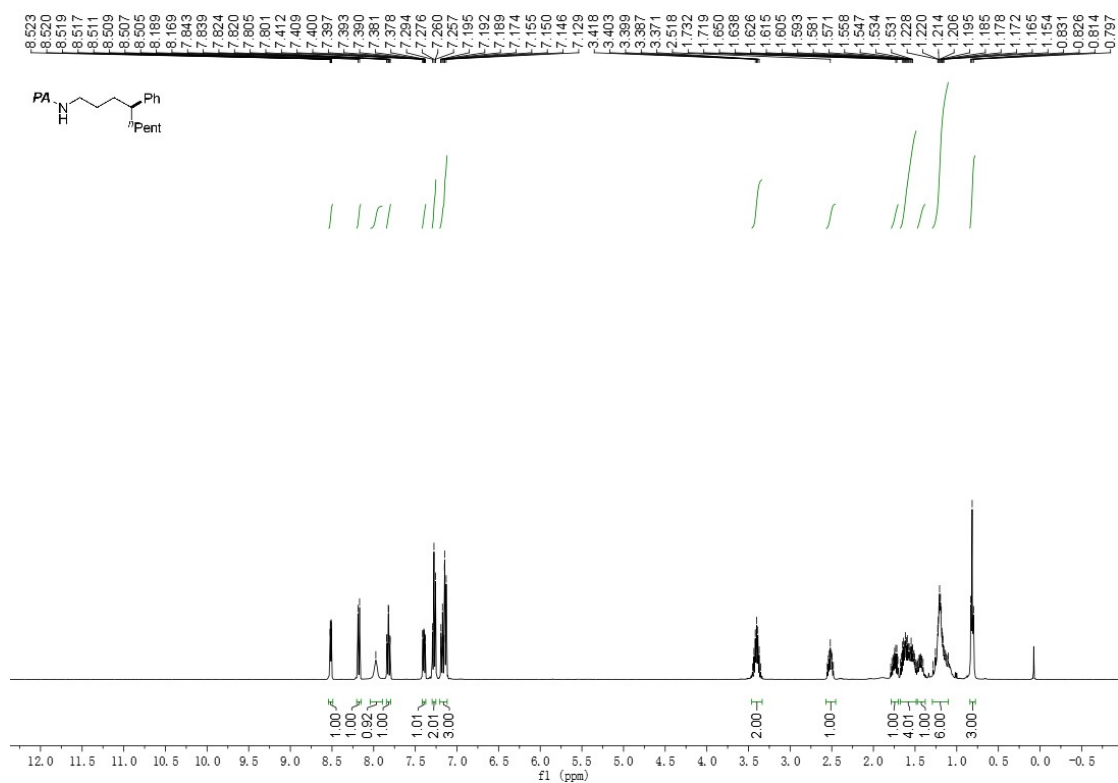

$^{13}\text{C}$  NMR (101 MHz,  $\text{CDCl}_3$ ) of **3aa** (from **Z**)

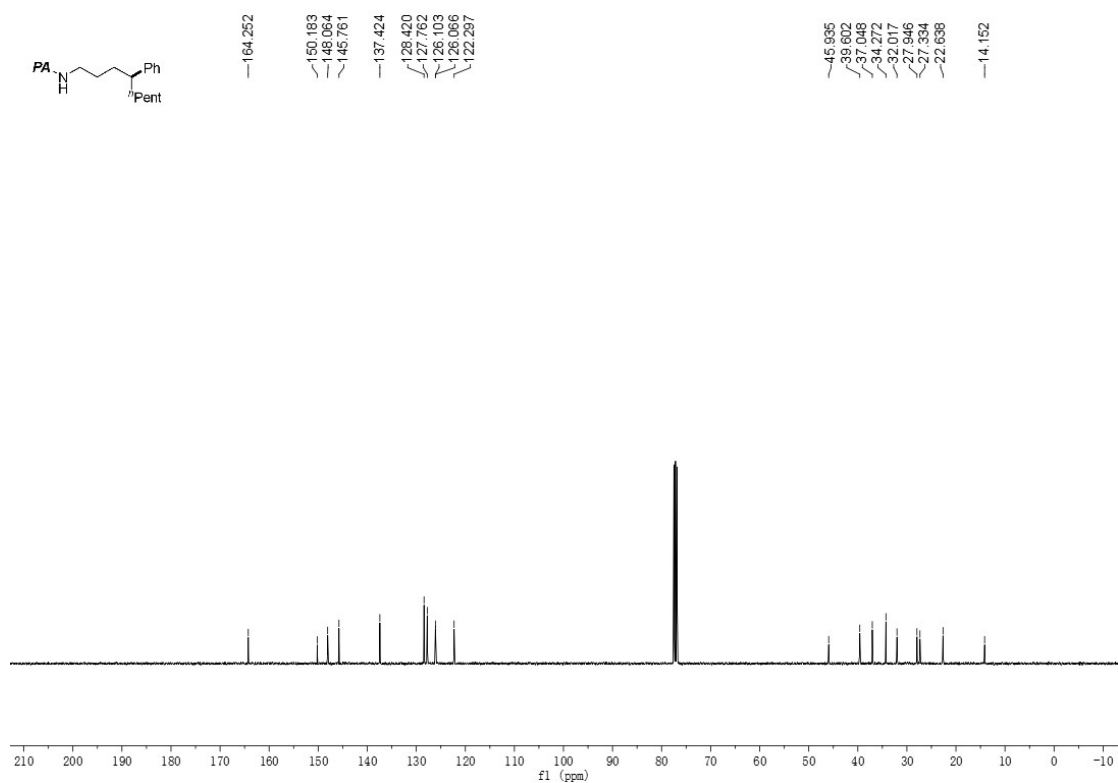

$^1\text{H}$  NMR (400 MHz,  $\text{CDCl}_3$ ) of **3ab** (from *E*)

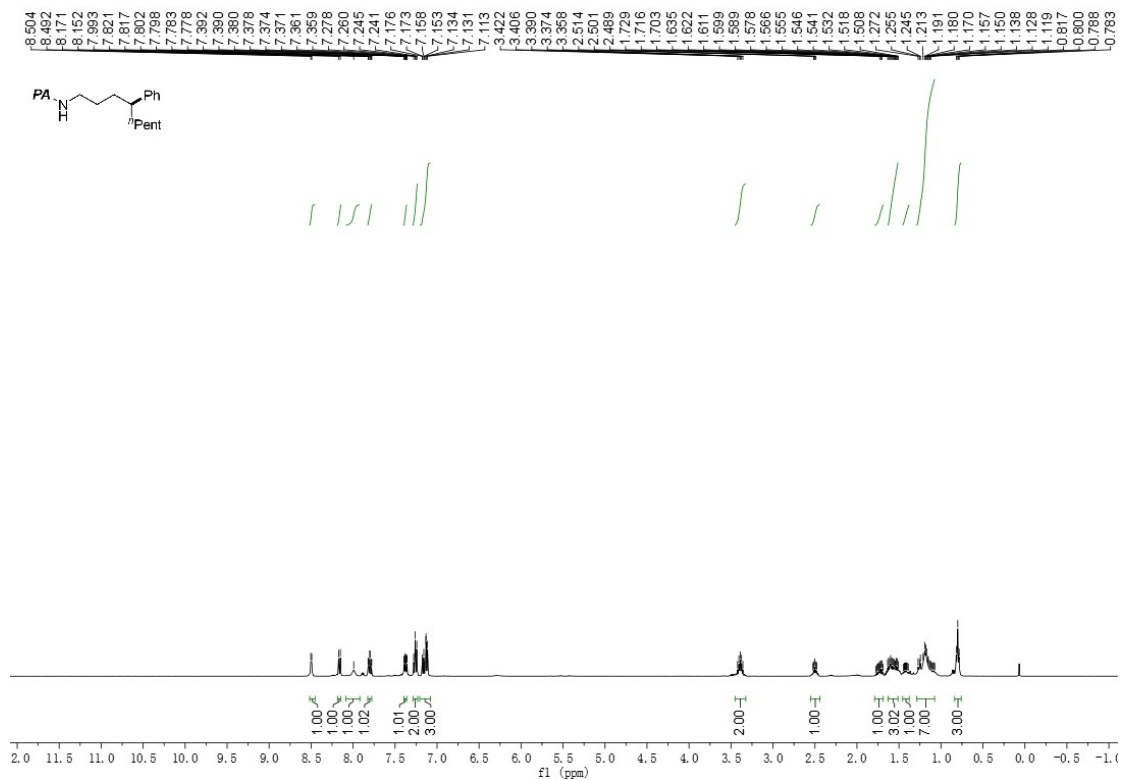

$^{13}\text{C}$  NMR (101 MHz,  $\text{CDCl}_3$ ) of **3ab** (from *E*)

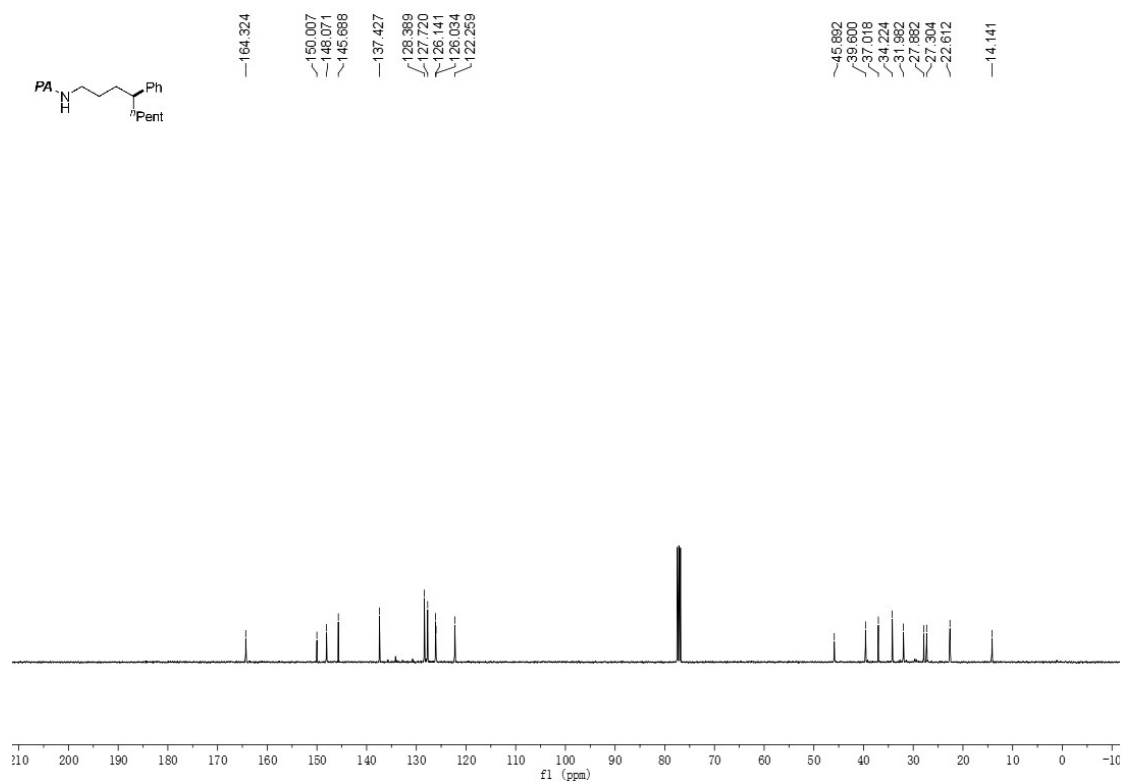

$^1\text{H}$  NMR (400 MHz,  $\text{CDCl}_3$ ) of **3ac** (from **Z**)

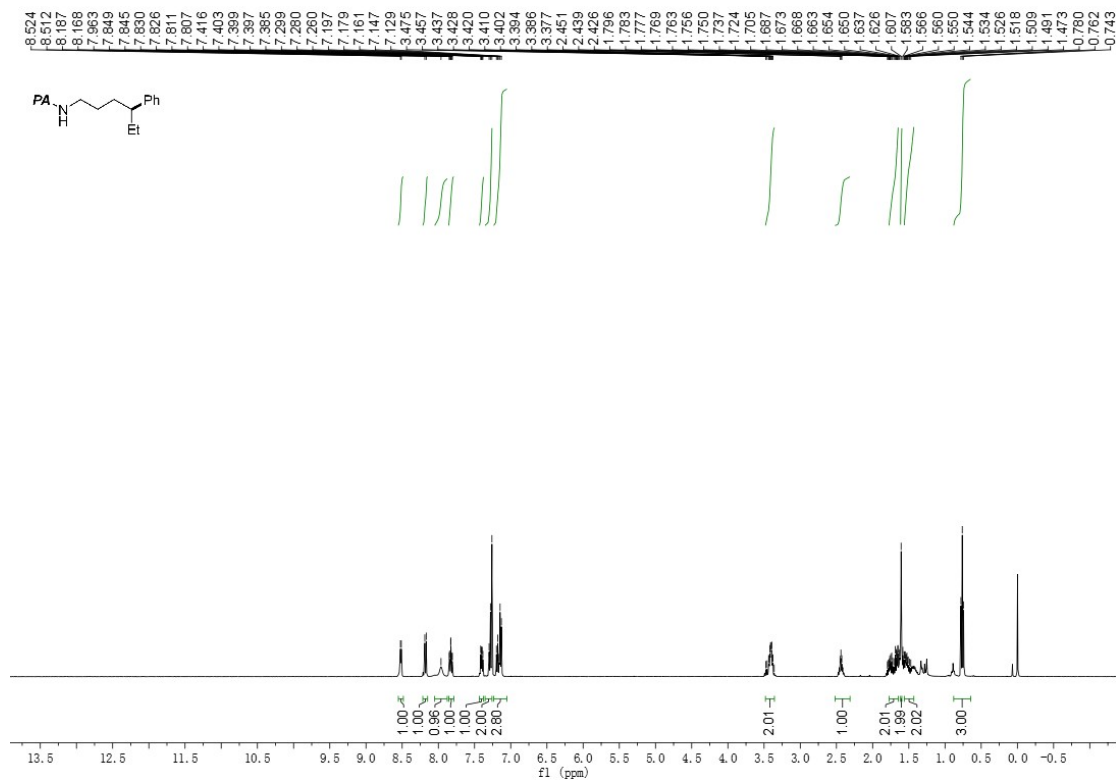

$^{13}\text{C}$  NMR (101 MHz,  $\text{CDCl}_3$ ) of **3ac** (from **Z**)

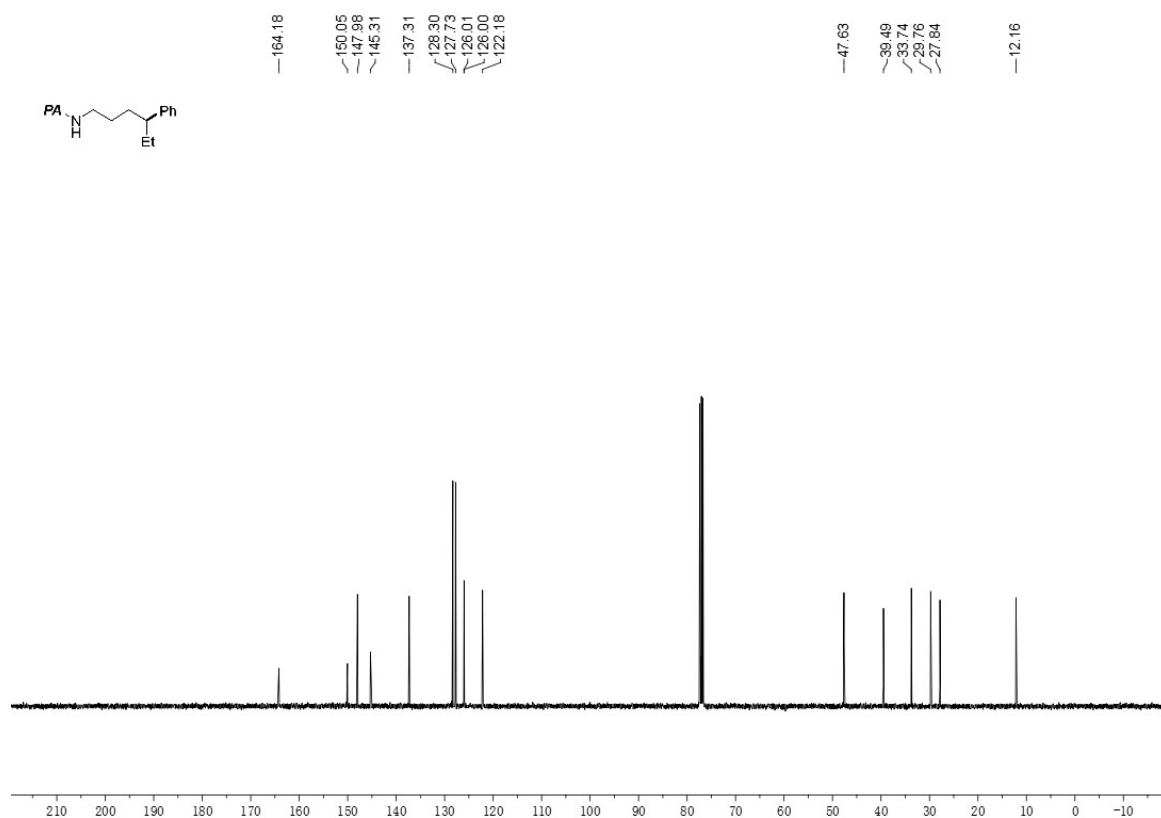

$^1\text{H}$  NMR (400 MHz,  $\text{CDCl}_3$ ) of **3ad** (from *E*)

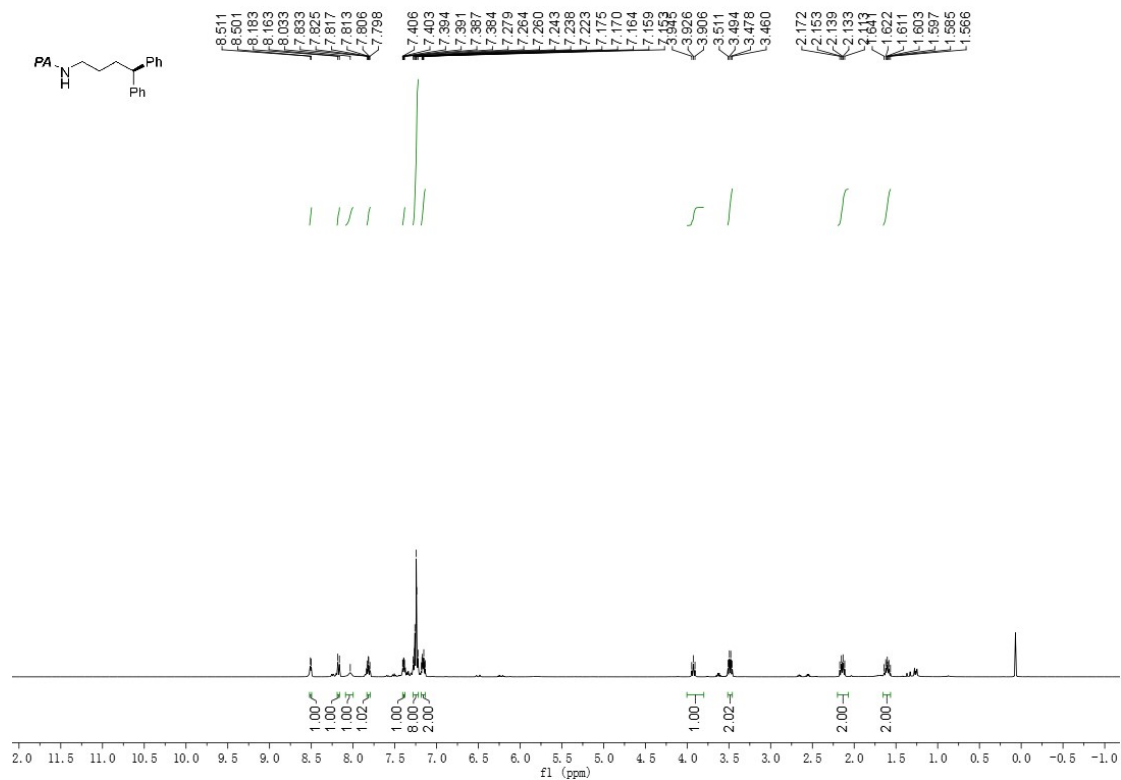

$^{13}\text{C}$  NMR (101 MHz,  $\text{CDCl}_3$ ) of **3ad** (from *E*)

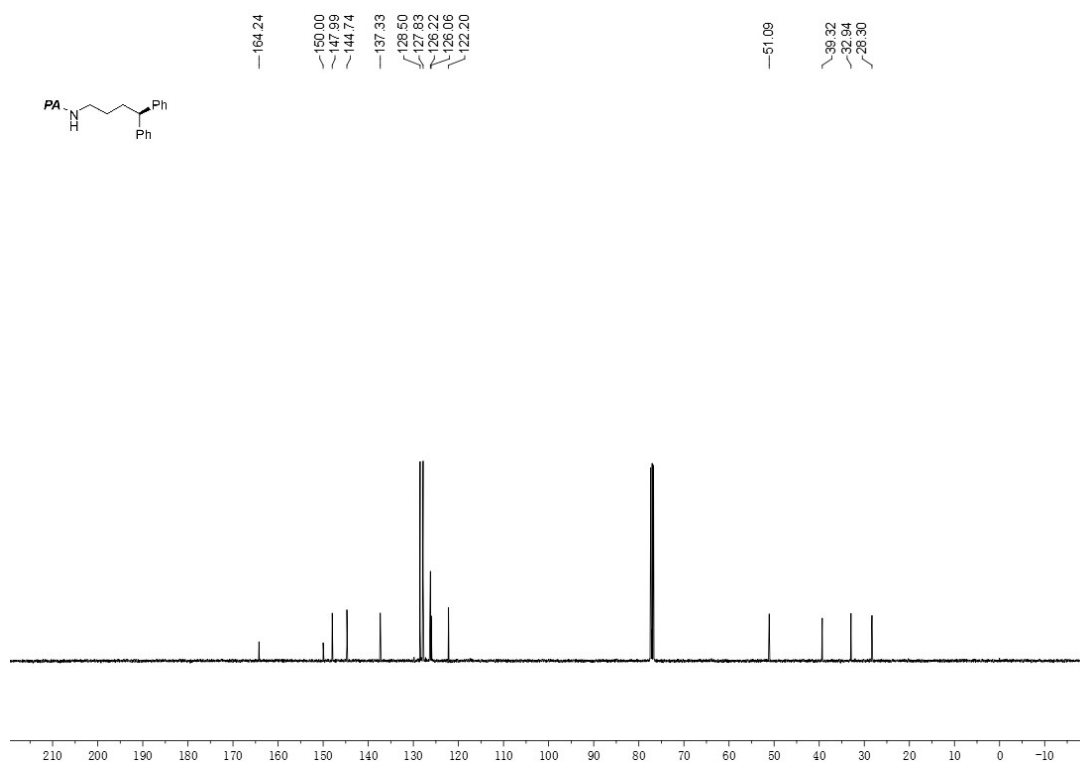



$^1\text{H}$  NMR (400 MHz,  $\text{CDCl}_3$ ) of **3ae** (from *E*)

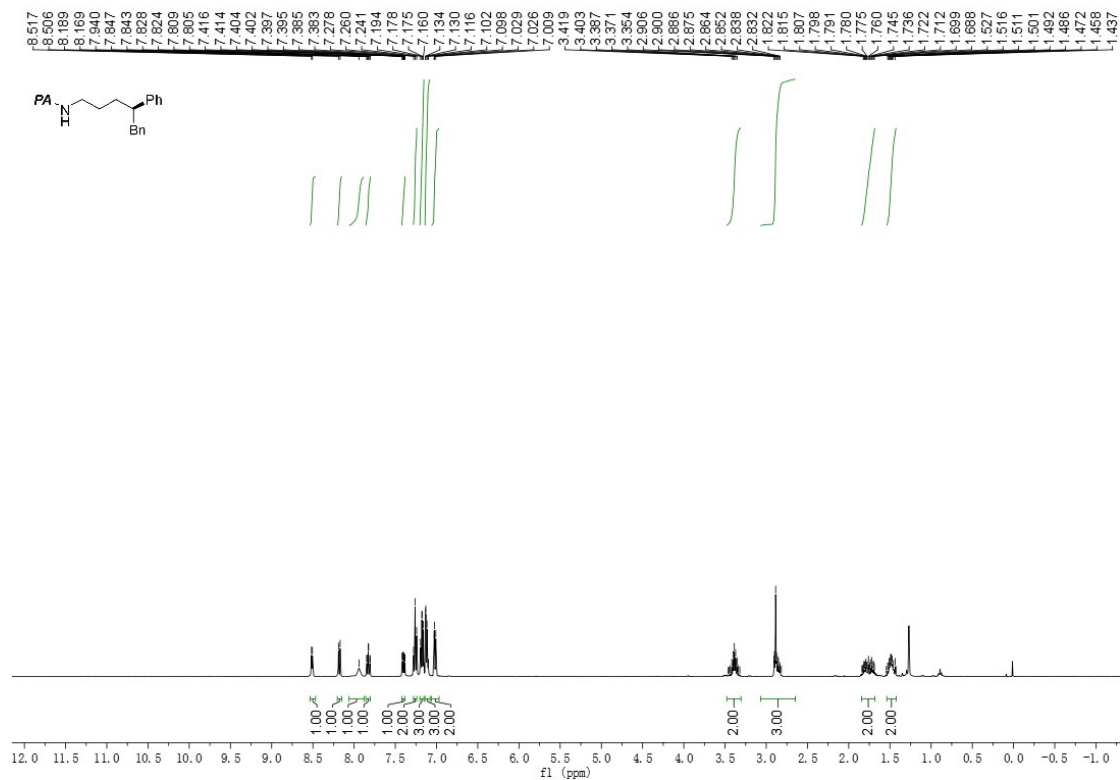

$^{13}\text{C}$  NMR (101 MHz,  $\text{CDCl}_3$ ) of **3ae** (from *E*)

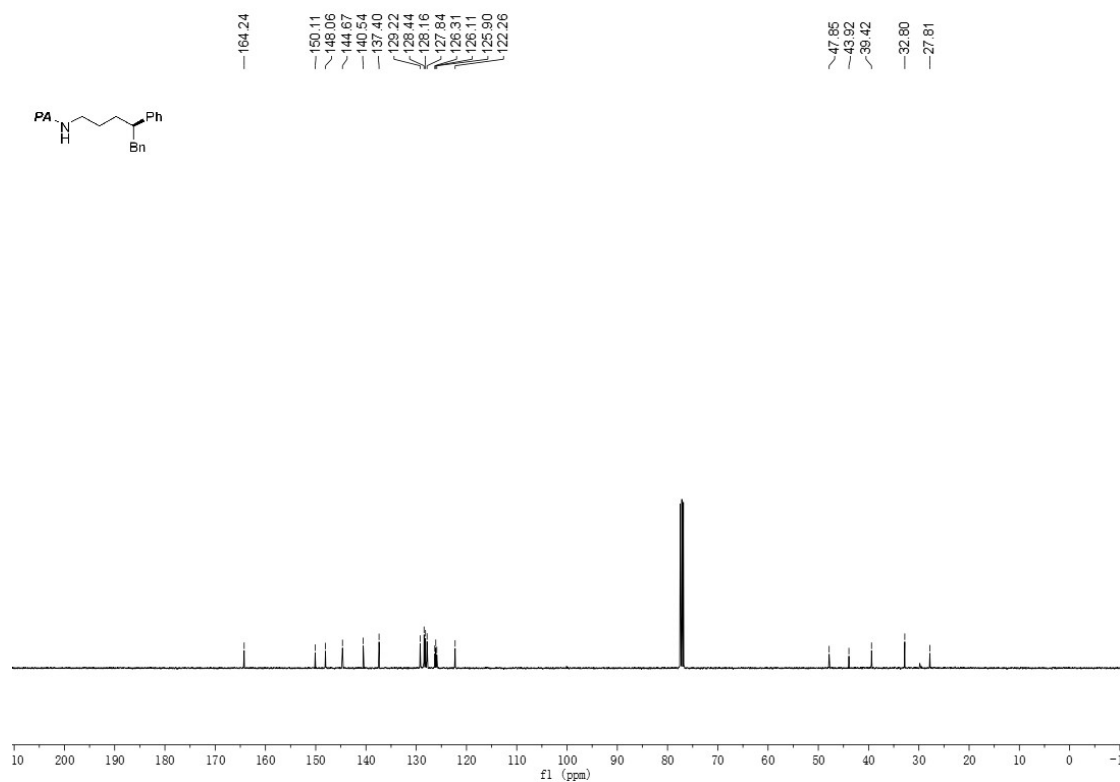

<sup>1</sup>H NMR (400 MHz, CDCl<sub>3</sub>) of **3af** (from *E*)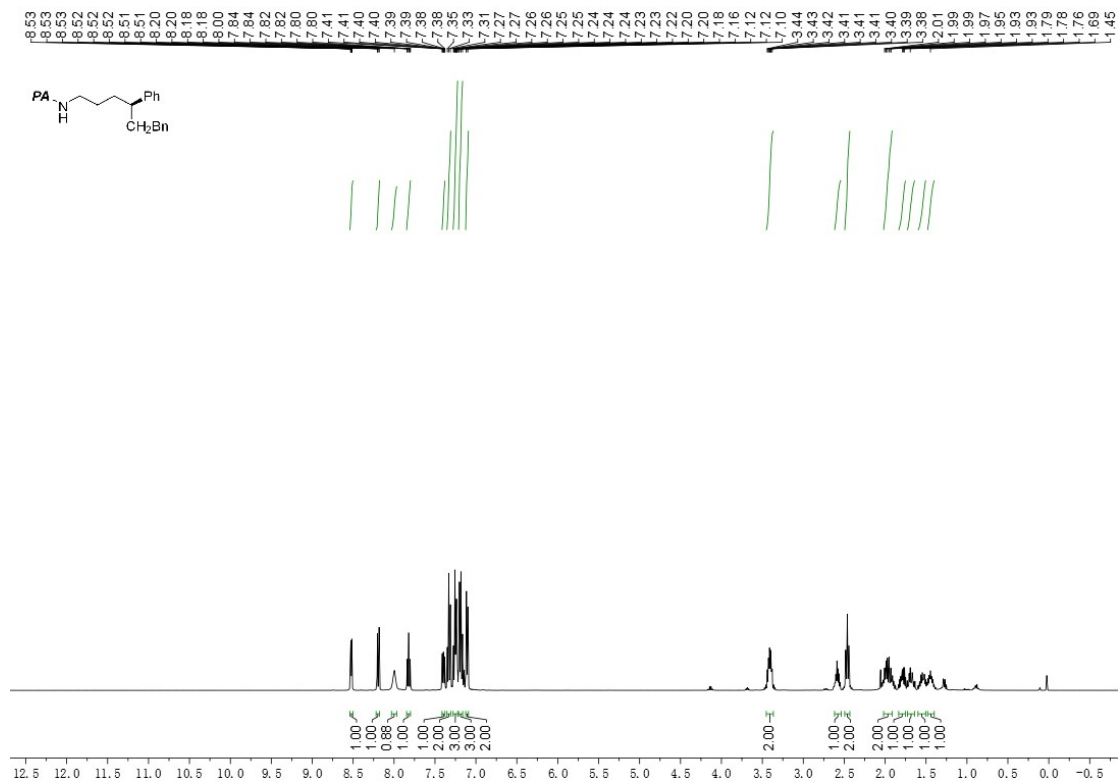 $^{13}\text{C}$  NMR (101 MHz,  $\text{CDCl}_3$ ) of **3af** (from *E*)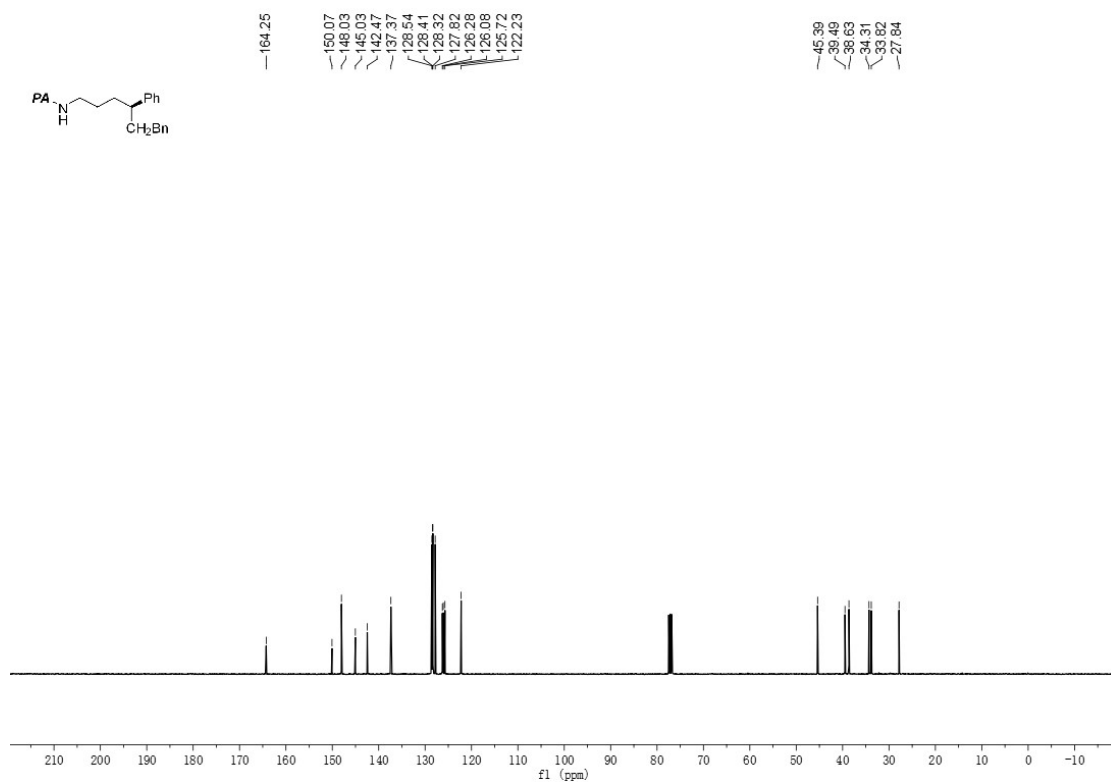

$^1\text{H}$  NMR (400 MHz,  $\text{CDCl}_3$ ) of **3ag** (from *E*)

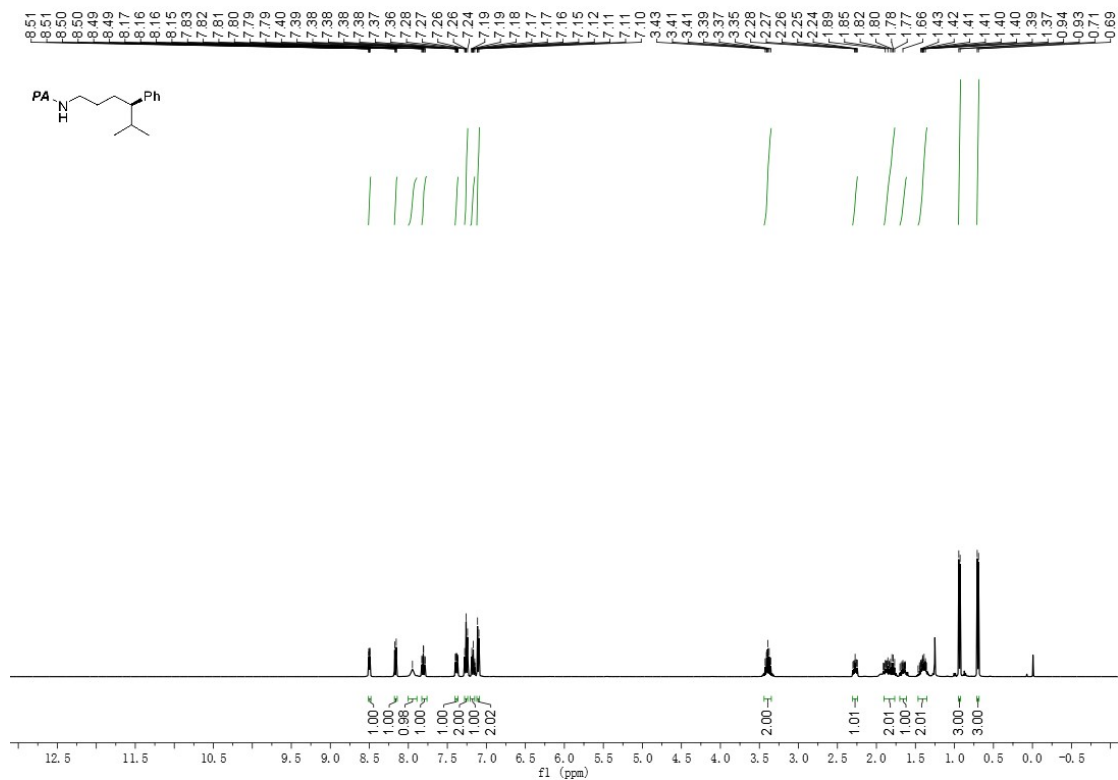

$^{13}\text{C}$  NMR (101 MHz,  $\text{CDCl}_3$ ) of **3ag** (from *E*)

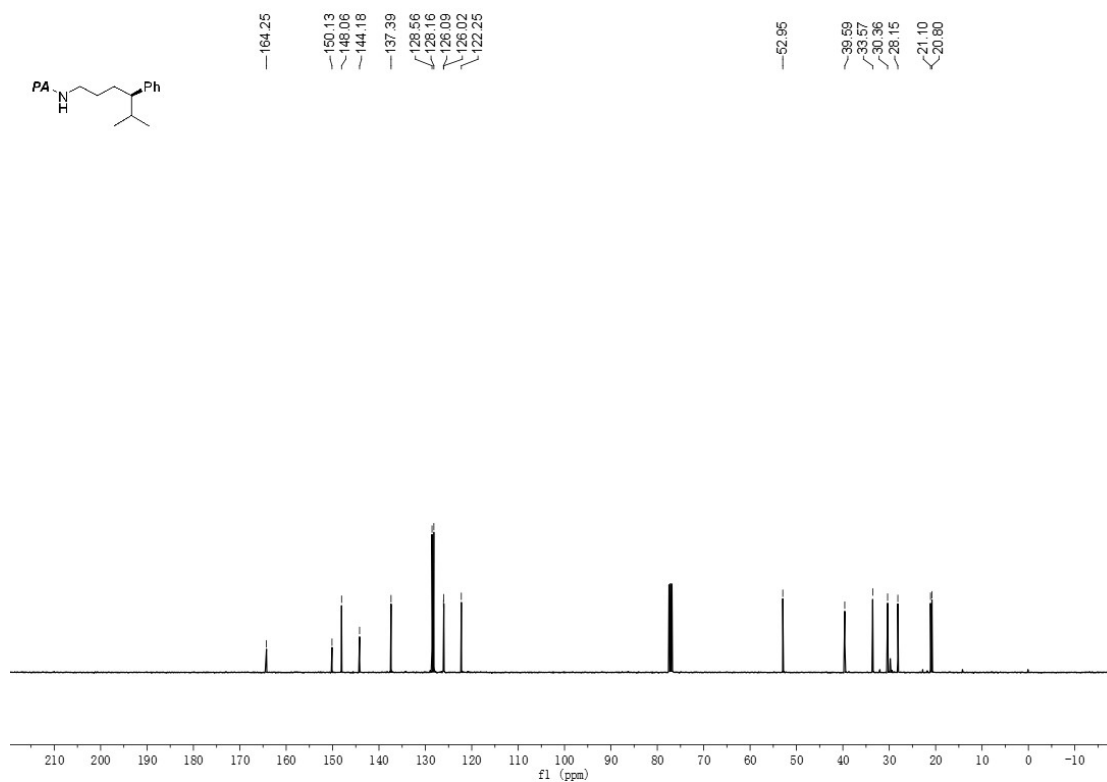

$^1\text{H}$  NMR (400 MHz,  $\text{CDCl}_3$ ) of **3ah** (from *E*)

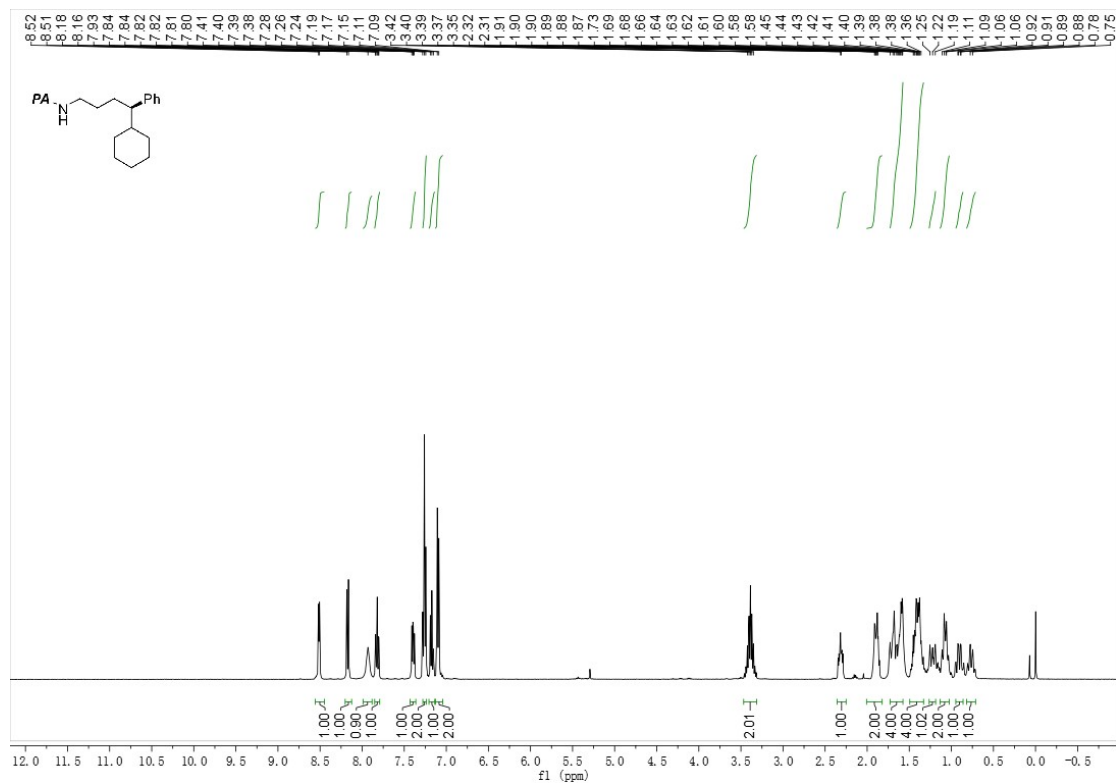

$^{13}\text{C}$  NMR (101 MHz,  $\text{CDCl}_3$ ) of **3ah** (from *E*)

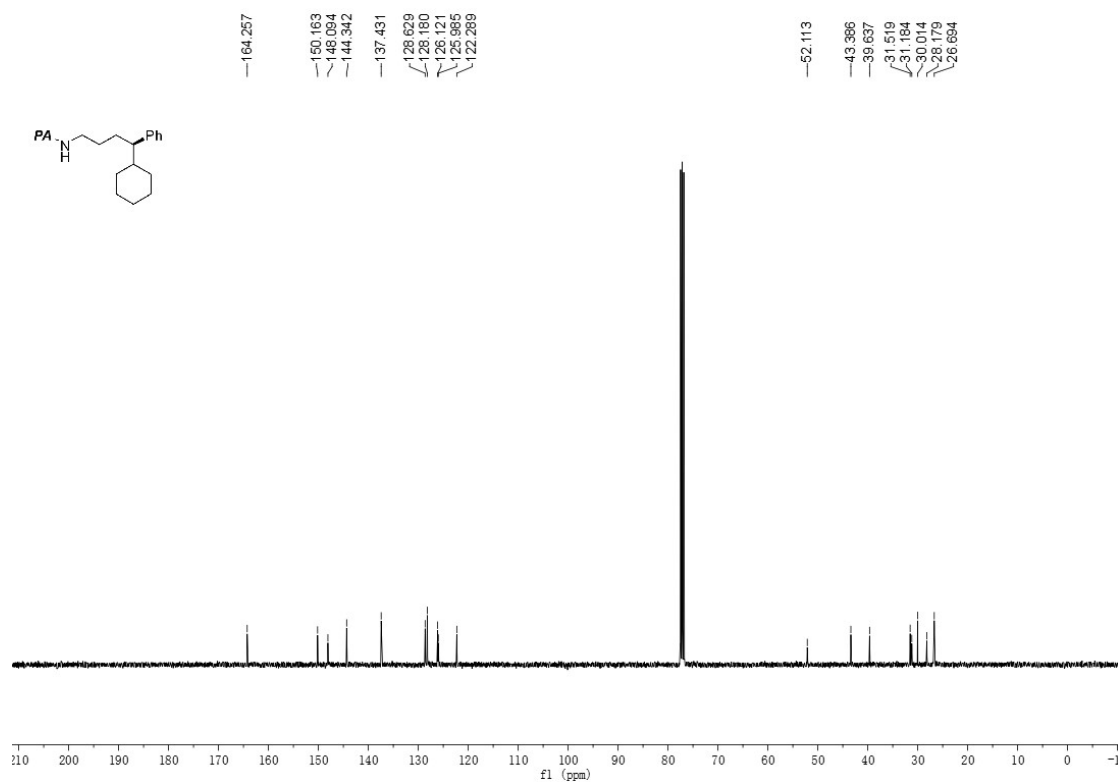

$^1\text{H}$  NMR (400 MHz,  $\text{CDCl}_3$ ) of **3ai**

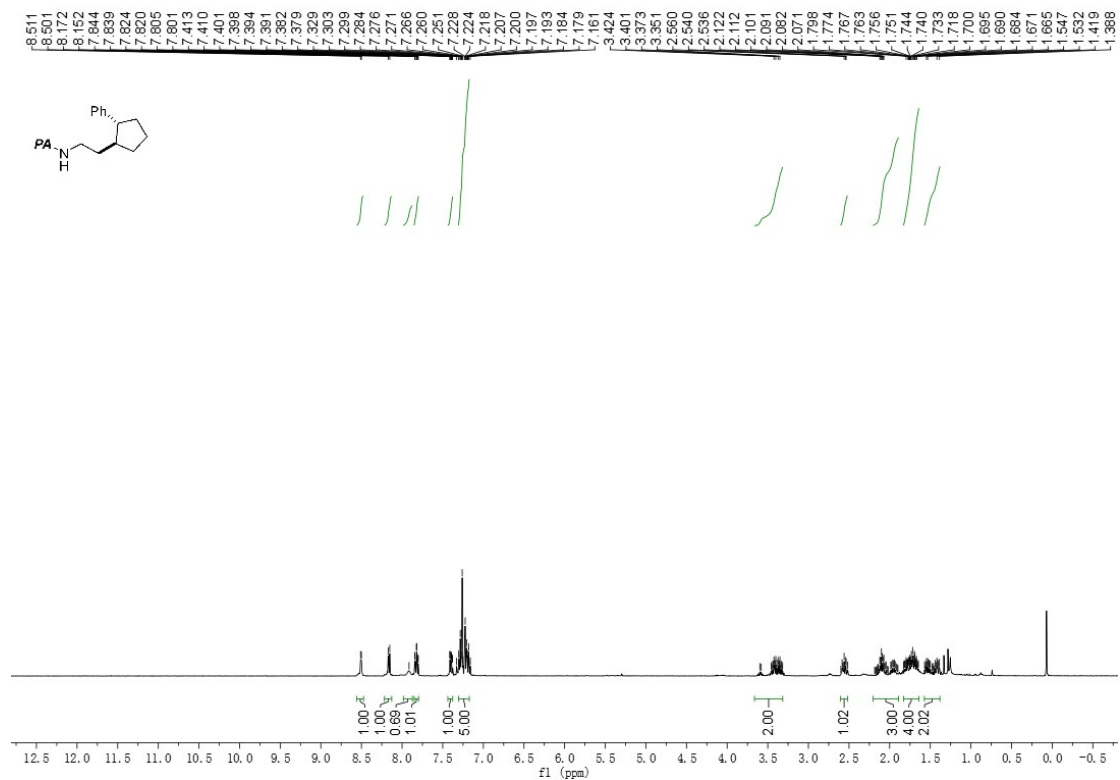

$^{13}\text{C}$  NMR (101 MHz,  $\text{CDCl}_3$ ) of **3ai**

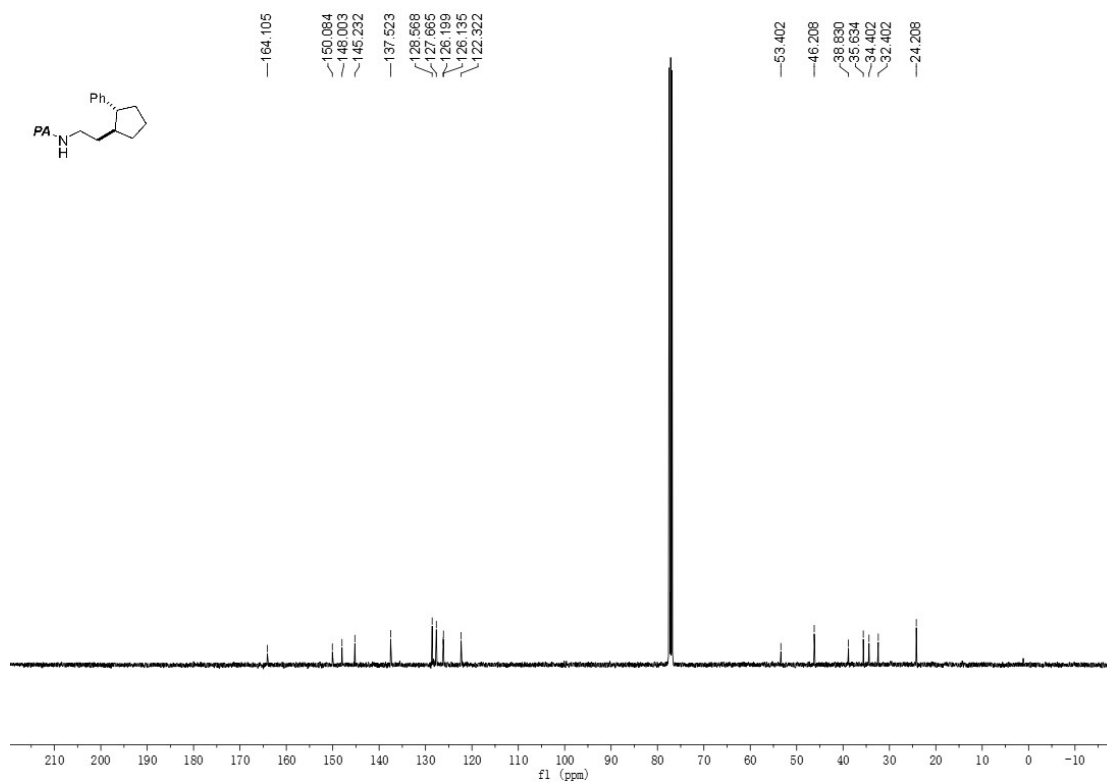

$^1\text{H}$  NMR (400 MHz,  $\text{CDCl}_3$ ) of **3aj**

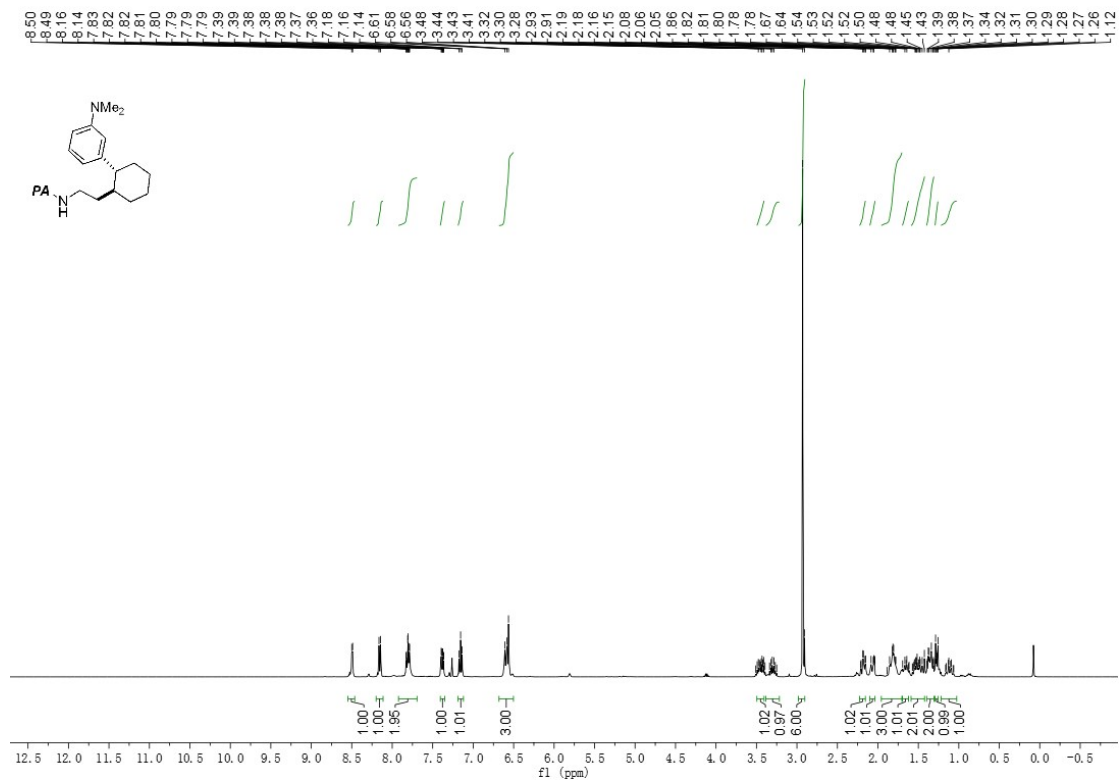

$^{13}\text{C}$  NMR (101 MHz,  $\text{CDCl}_3$ ) of **3aj**

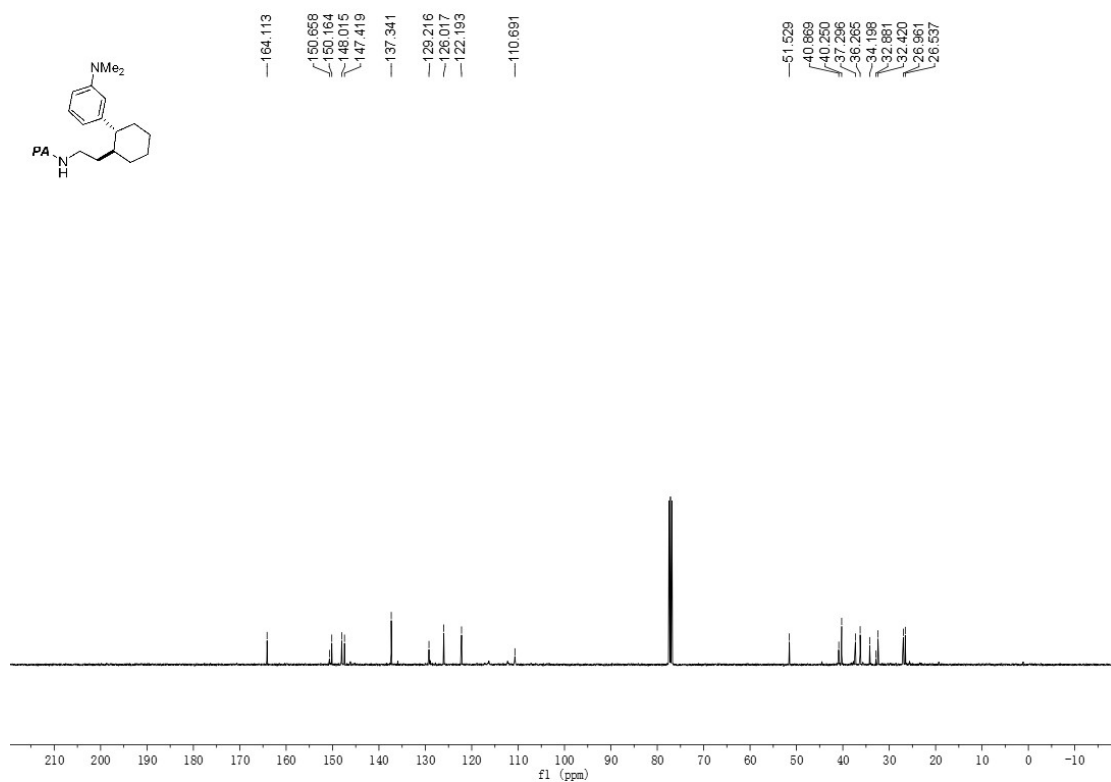

1D  $^{13}\text{C}$  DEPT 90 of **3aj**

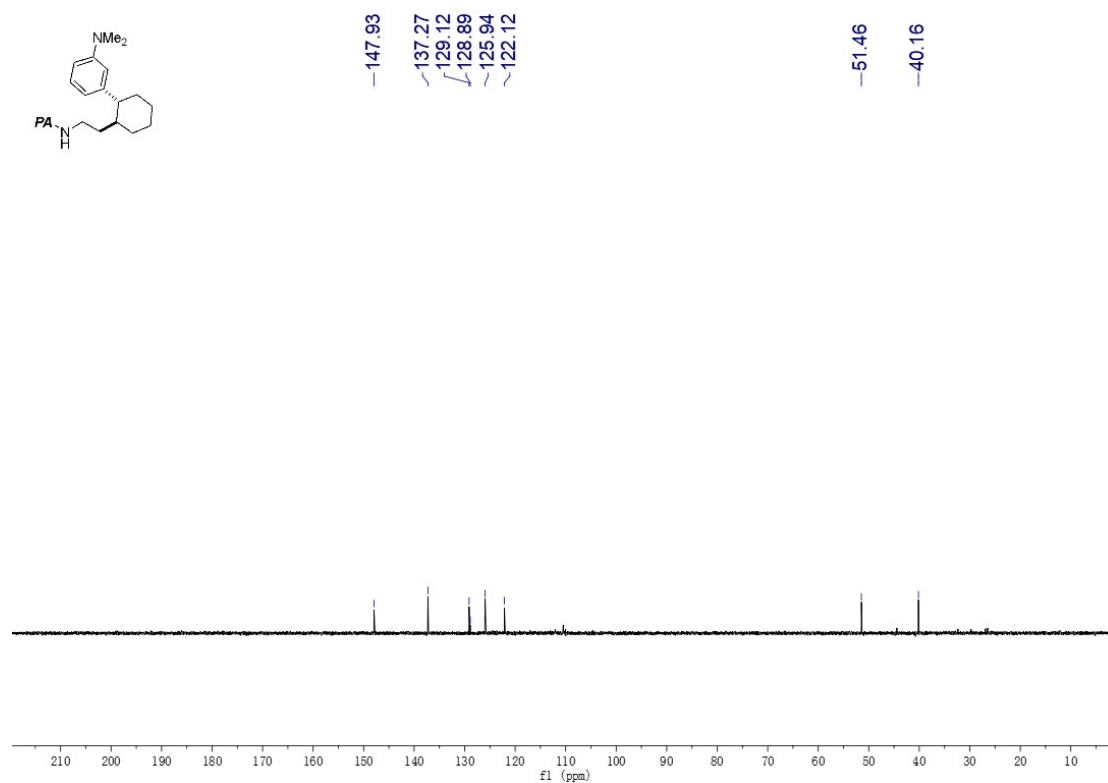

HSQC of **3aj**

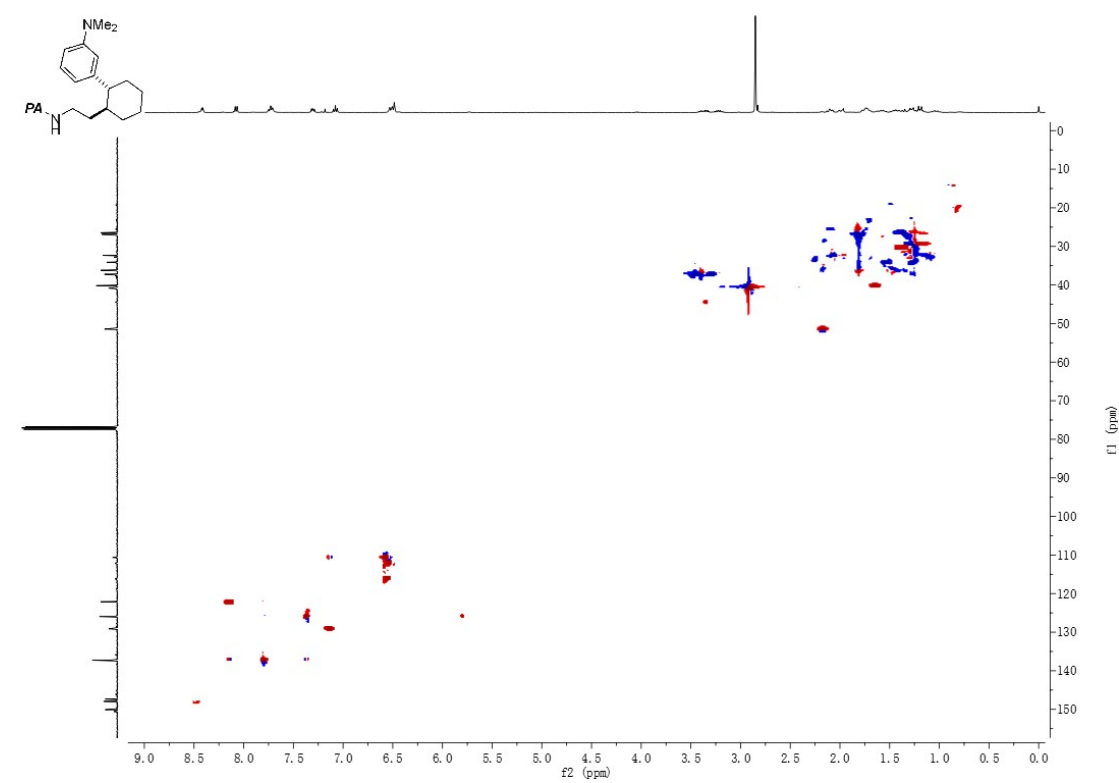

# NOE of **3aj**

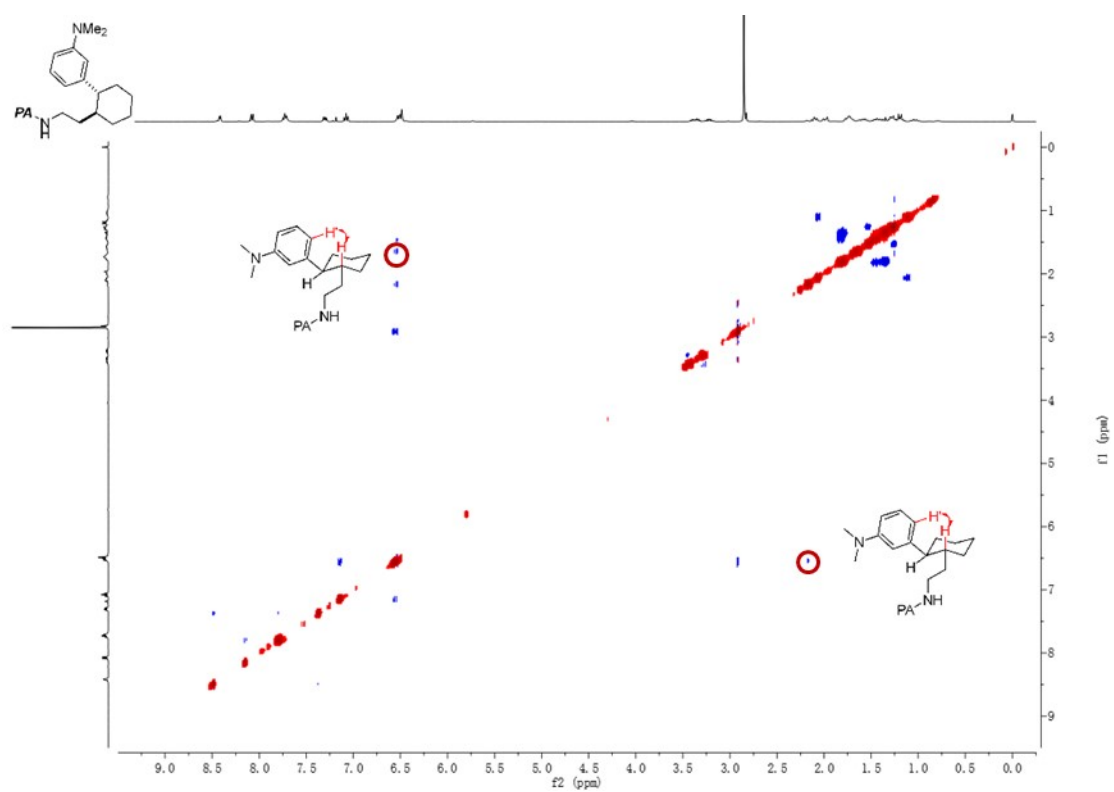



$^1\text{H}$  NMR (400 MHz,  $\text{CDCl}_3$ ) of **3ak**

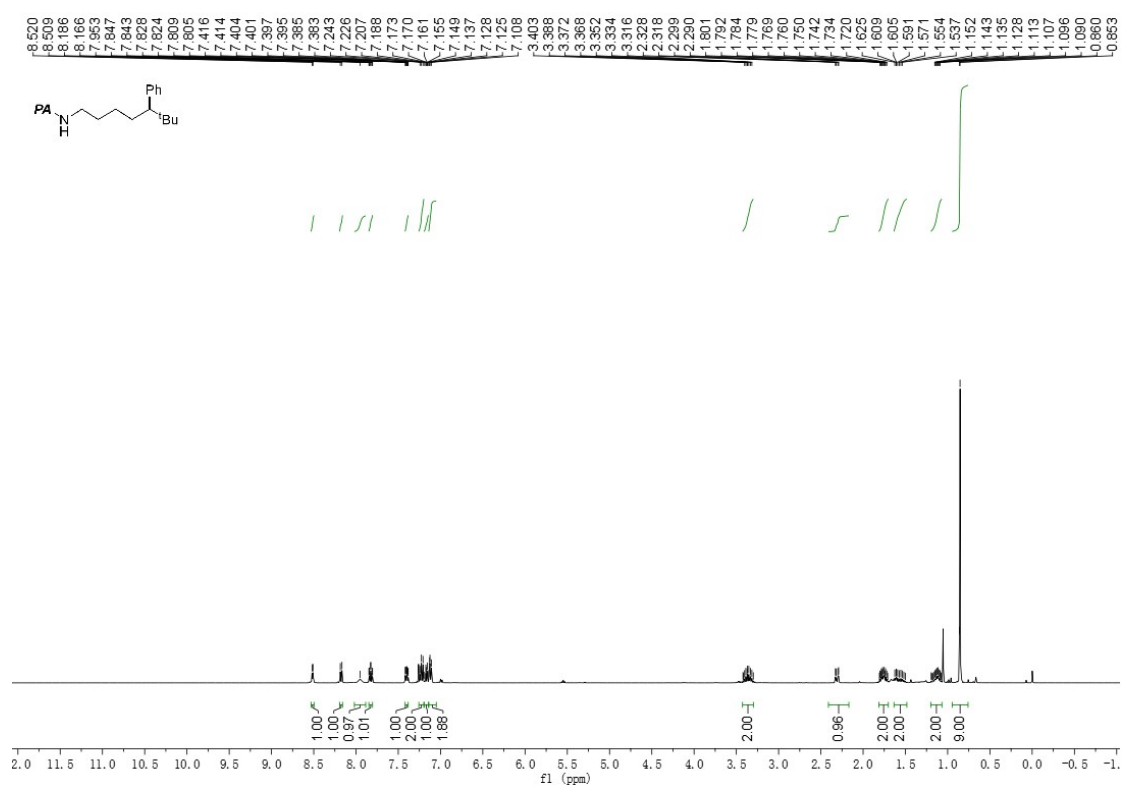

$^{13}\text{C}$  NMR (101 MHz,  $\text{CDCl}_3$ ) of **3ak**

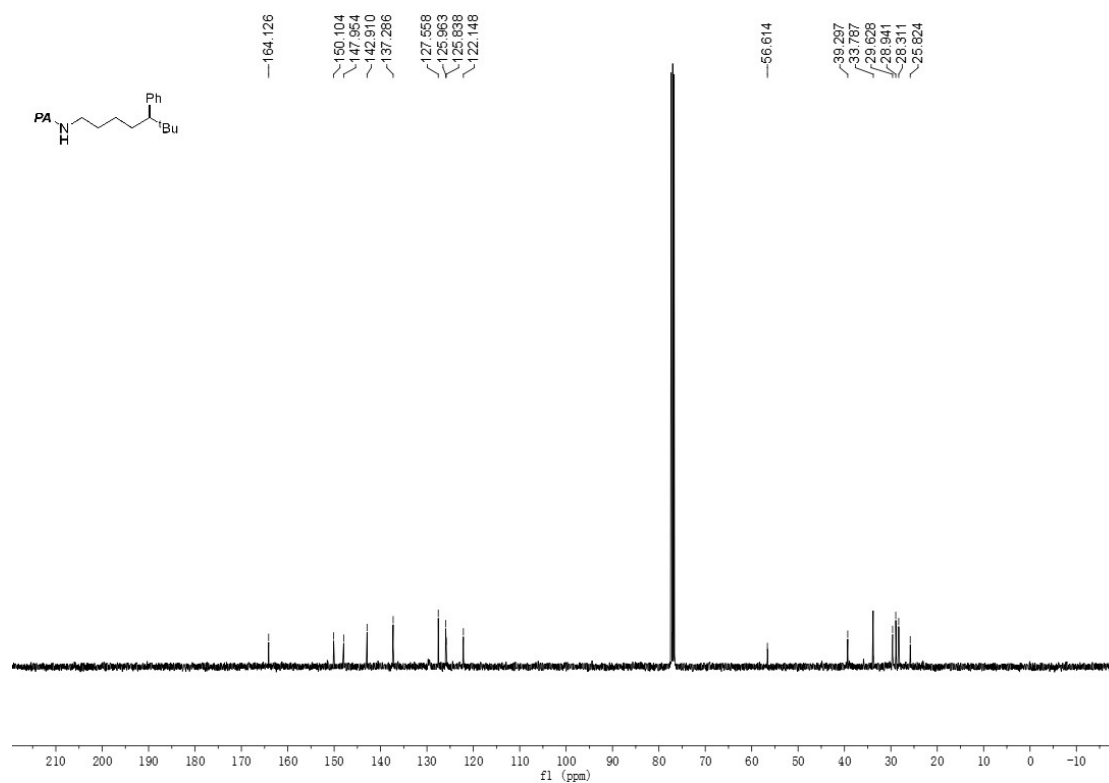

<sup>1</sup>H NMR (400 MHz, CDCl<sub>3</sub>) of **3al**

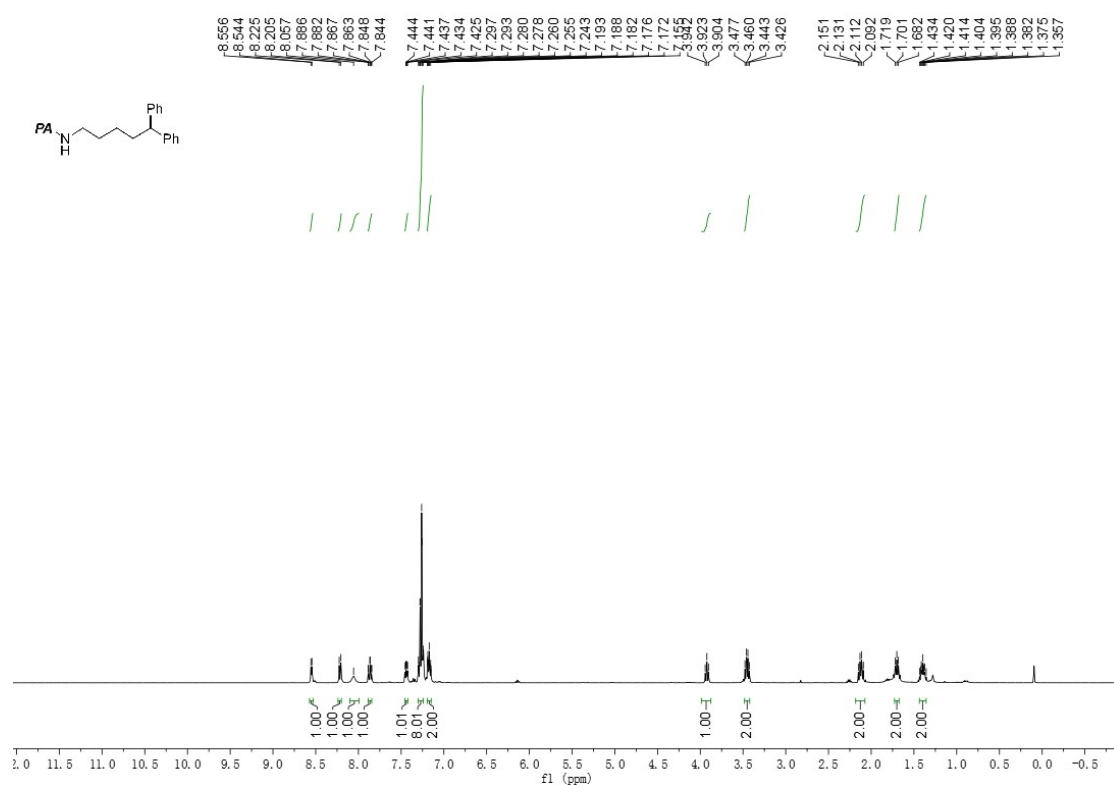

<sup>13</sup>C NMR (101 MHz, CDCl<sub>3</sub>) of **3al**

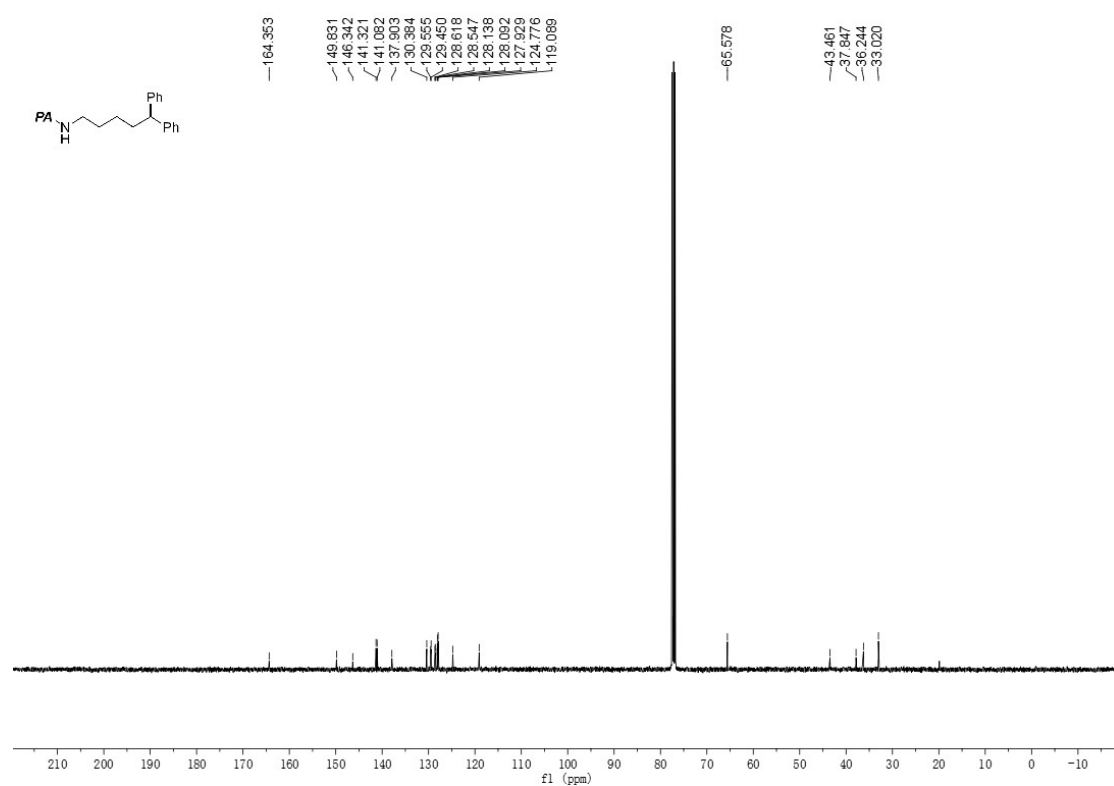

$^1\text{H}$  NMR (400 MHz,  $\text{CDCl}_3$ ) of **3am**

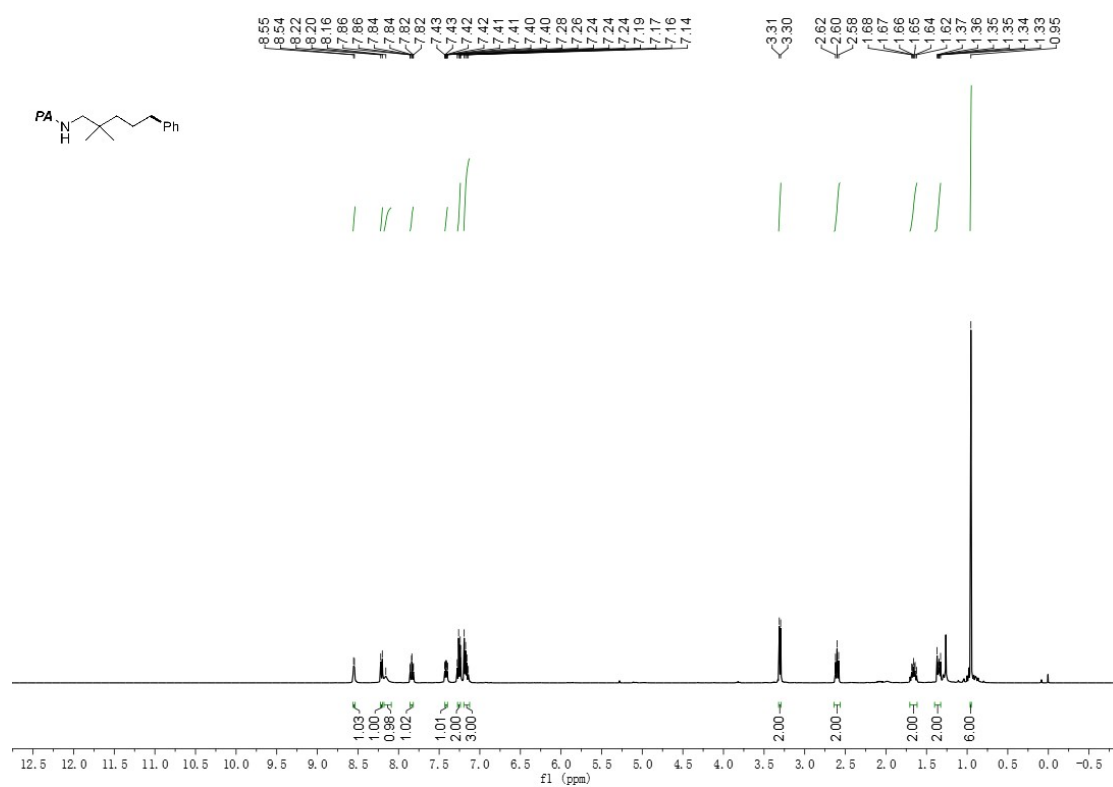

$^{13}\text{C}$  NMR (101 MHz,  $\text{CDCl}_3$ ) of **3am**

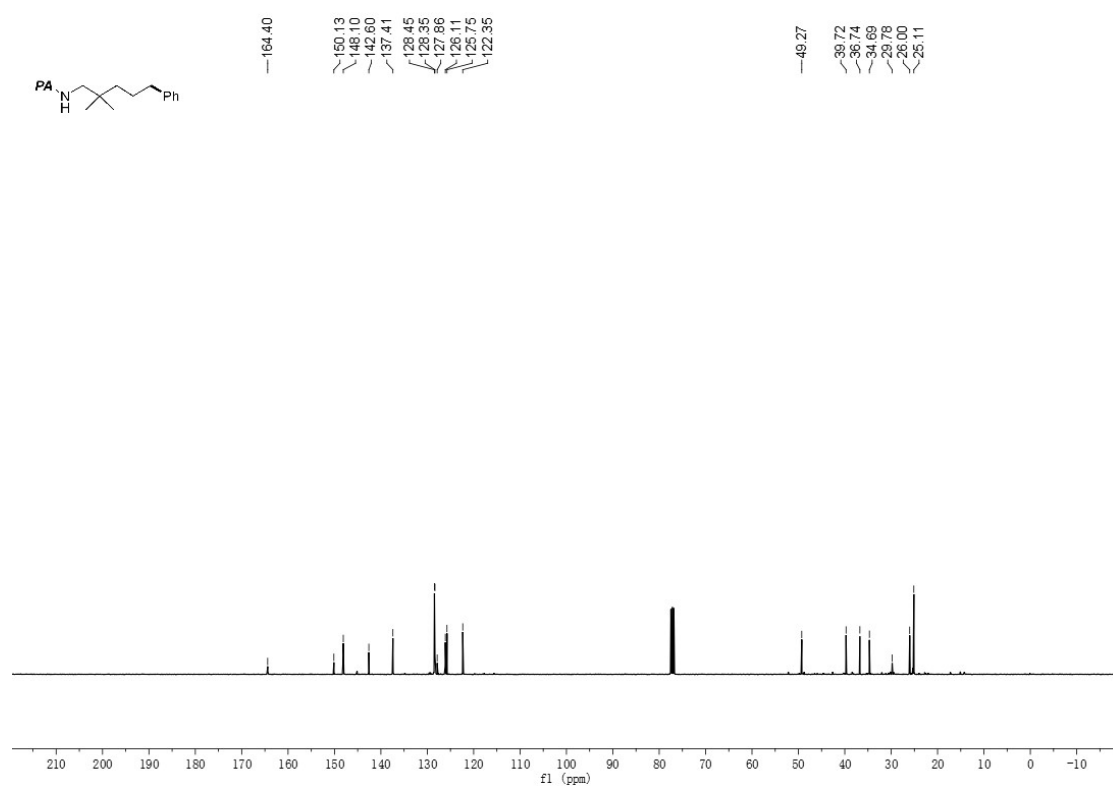

$^1\text{H}$  NMR (400 MHz,  $\text{CDCl}_3$ ) of **5a**

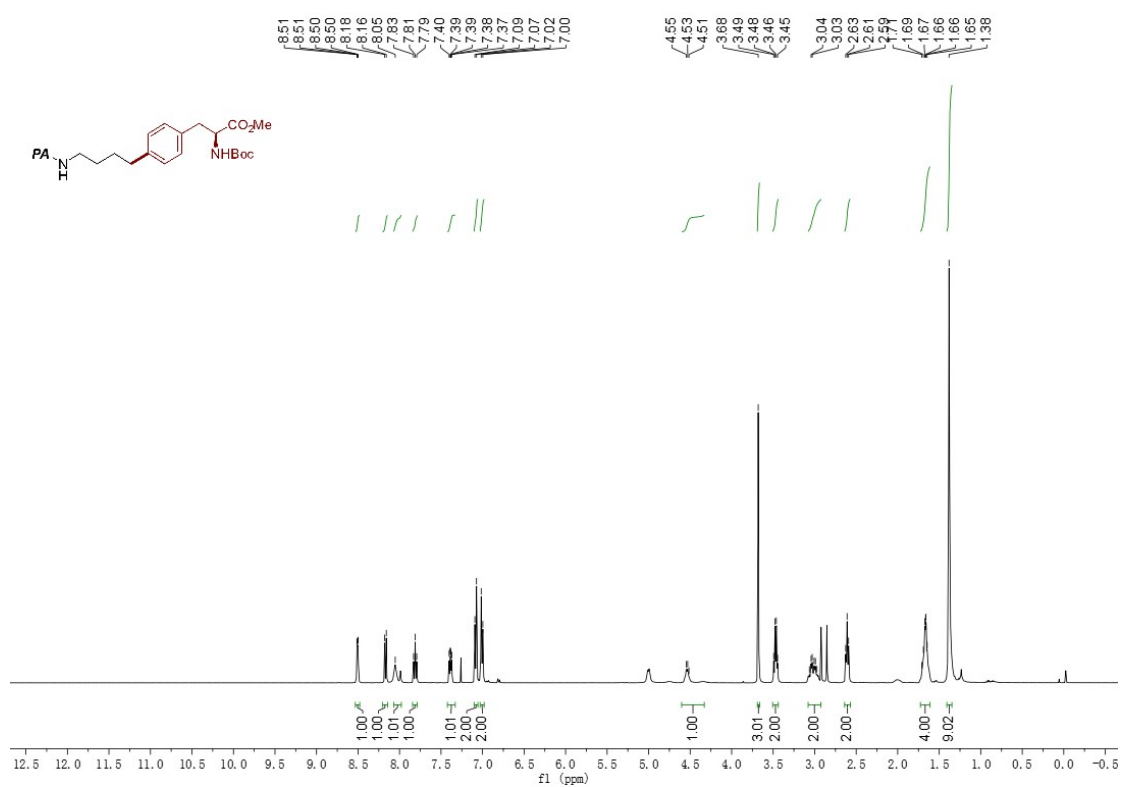

$^{13}\text{C}$  NMR (101 MHz,  $\text{CDCl}_3$ ) of **5a**

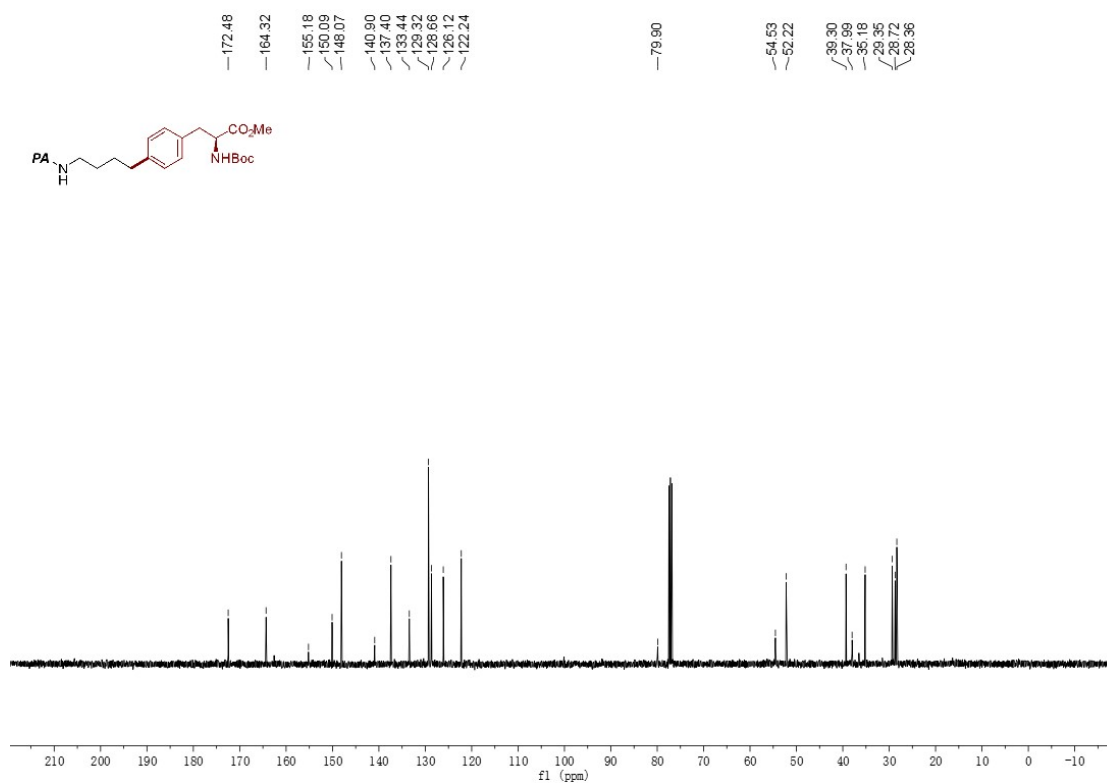

<sup>1</sup>H NMR (400 MHz, CDCl<sub>3</sub>) of **5b**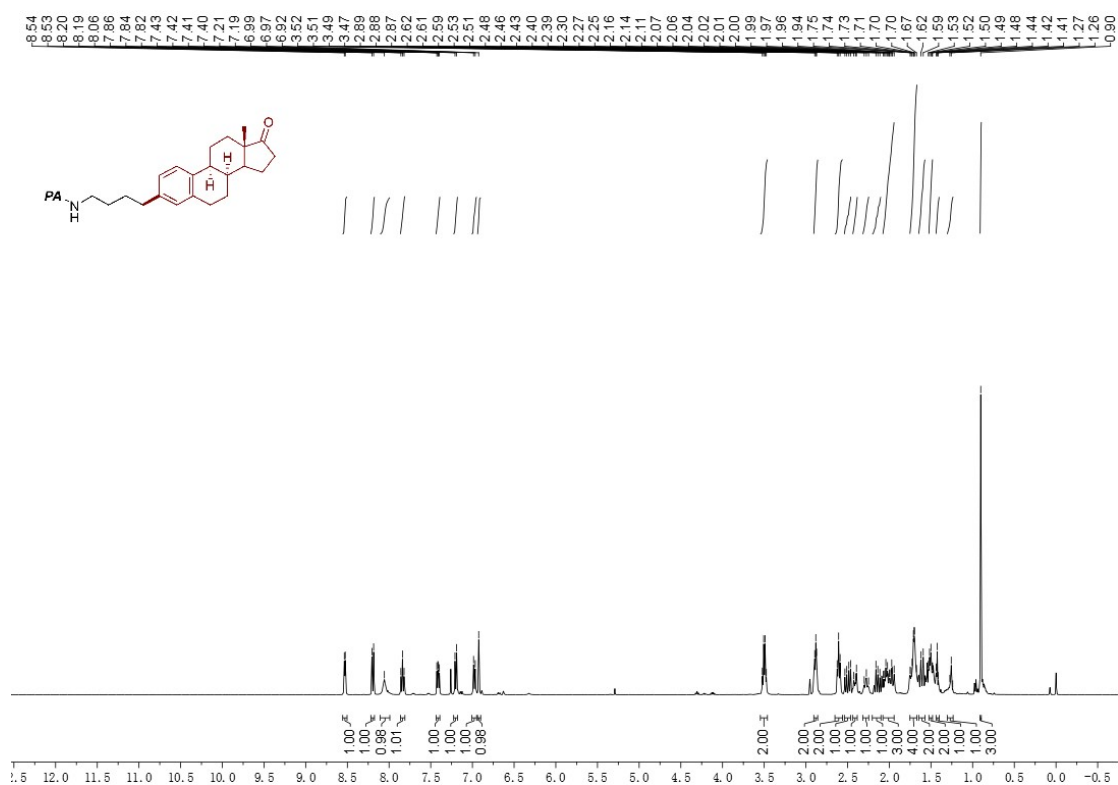 $^{13}\text{C}$  NMR (101 MHz,  $\text{CDCl}_3$ ) of **5b**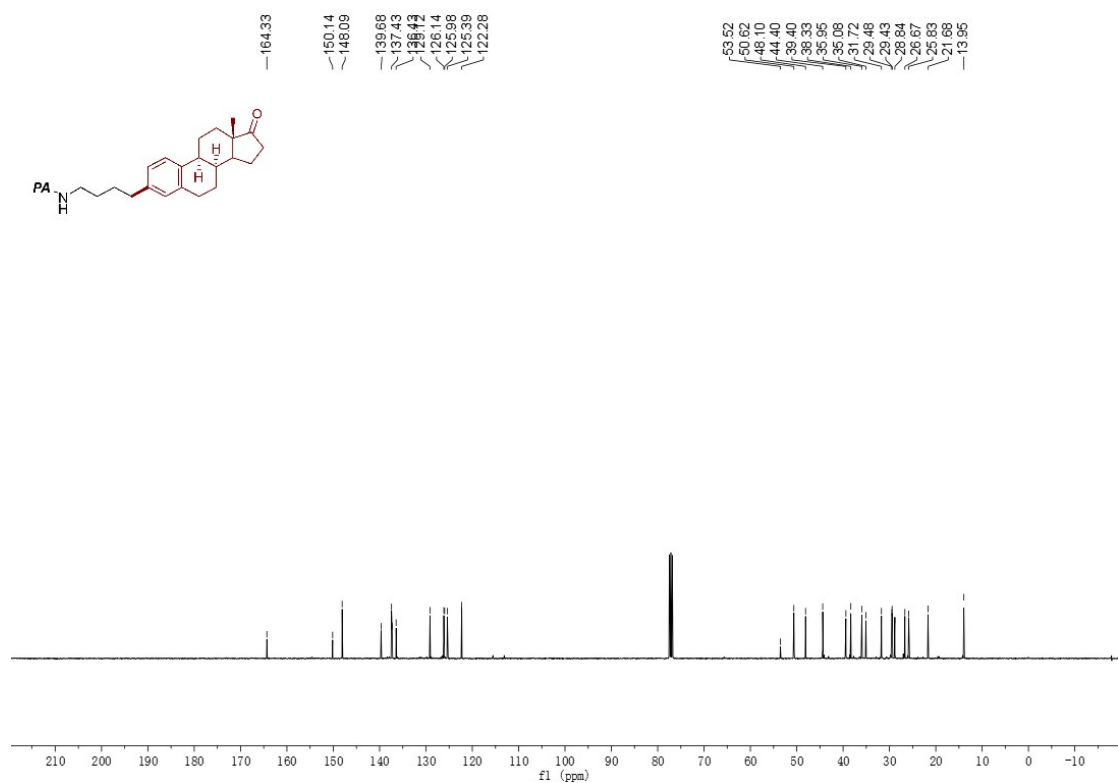

Supplement: d2cc04932e1.pdf [file d2cc04932e1.pdf]
